# Supplementary material for: Marine natural products from sponges (Porifera) of the order Dictyoceratida (2013 to 2019); a promising source for drug discovery
Source: PubMed Central journal article supplement (PMC9056847; doi:10.1039/d0ra04408c), 2020-09-21
Supplement: RA-010-D0RA04408C-s001.pdf [file RA-010-D0RA04408C-s001.pdf]

## Supplementary material

### **Marine natural products from sponges (Porifera) of the order Dictyoceratida (2013 to 2019); a promising source for drug discovery**

Enas Reda Abdelaleem<sup>a</sup>, Mamdouh Nabil Samy<sup>a</sup>, Samar Yehia Desoukey<sup>a</sup>, Miaomiao Liu<sup>b</sup>, Ronald J Quinn<sup>b</sup>, Usama Ramadan Abdelmohsen<sup>a,c\*</sup>

<sup>a</sup>Department of Pharmacognosy, Faculty of Pharmacy, Minia University, 61519Minia, Egypt.

<sup>b</sup>Griffith Institute for Drug Discovery, Griffith University Brisbane, Queensland, 4111Australia

<sup>c</sup>Department of Pharmacognosy, Faculty of Pharmacy, Deraya University, Universities Zone, 61111 New Minia City, Minia, Egypt

**Table (S1): Secondary metabolites isolated from dictyoceratida sponges and their biological tested activities (2013 to December 2019):**

| Compound                      | Class                | Bioactivity                              | Source             | Collection site         | Ref | State |
|-------------------------------|----------------------|------------------------------------------|--------------------|-------------------------|-----|-------|
| <b>A- Family: Thorectidae</b> |                      |                                          |                    |                         |     |       |
| Hyrtioerectine D              | Nitrogenous compound | Antimicrobial, Antioxidant and cytotoxic | <i>Hyrtios sp.</i> | The Red Sea             | 1   | New   |
| Hyrtioerectine E              | Nitrogenous compound | Antimicrobial, Antioxidant and cytotoxic | <i>Hyrtios sp.</i> | The Red Sea             | 1   | New   |
| Hyrtioerectine F              | Nitrogenous compound | Antimicrobial, Antioxidant and cytotoxic | <i>Hyrtios sp.</i> | The Red Sea             | 1   | New   |
| Hyrtimomine A                 | Nitrogenous compound | Cytotoxic activity                       | <i>Hyrtios sp.</i> | Kerama Islands, Okinawa | 2   | New   |
| Hyrtimomine B                 | Nitrogenous compound | NA                                       | <i>Hyrtios sp.</i> | Kerama Islands, Okinawa | 2   | New   |
| Hyrtimomine C                 | Nitrogenous compound | NA                                       | <i>Hyrtios sp.</i> | Kerama Islands, Okinawa | 2   | New   |
| Hyrtimomine D                 | Nitrogenous compound | Antimicrobial activity                   | <i>Hyrtios sp.</i> | Kerama Islands, Okinawa | 3   | New   |
| Hyrtimomine E                 | Nitrogenous compound | Antimicrobial activity                   | <i>Hyrtios sp.</i> | Kerama Islands, Okinawa | 3   | New   |
| Hyrtimomine F                 | Nitrogenous compound | Antimicrobial activity                   | <i>Hyrtios sp.</i> | Kerama Islands, Okinawa | 4   | New   |
| Hyrtimomine G                 | Nitrogenous compound | Antimicrobial activity                   | <i>Hyrtios sp.</i> | Kerama Islands, Okinawa | 4   | New   |
| Hyrtimomine H                 | Nitrogenous compound | Antimicrobial activity                   | <i>Hyrtios sp.</i> | Kerama Islands, Okinawa | 4   | New   |

|                                                                                                                                                                  |                      |                                        |                    |                            |   |       |
|------------------------------------------------------------------------------------------------------------------------------------------------------------------|----------------------|----------------------------------------|--------------------|----------------------------|---|-------|
| Hyrtimomine I                                                                                                                                                    | Nitrogenous compound | Antimicrobial activity                 | <i>Hyrtios sp.</i> | Kerama Islands,<br>Okinawa | 4 | New   |
| Hyrtimomine J                                                                                                                                                    | Nitrogenous compound | Antimicrobial activity                 | <i>Hyrtios sp.</i> | Kerama Islands,<br>Okinawa | 4 | New   |
| Hyrtimomine K                                                                                                                                                    | Nitrogenous compound | Antimicrobial activity                 | <i>Hyrtios sp.</i> | Kerama Islands,<br>Okinawa | 4 | New   |
| Sesterstamide                                                                                                                                                    | Sesterterpene        | Antileishmanial activity               | <i>Hyrtios sp.</i> | Paracel Islands,<br>China  | 5 | New   |
| (5bR,11aS,13R,13aS,13bR)-13-hydroxy-5b,8,8,11a,13a-pentamethyl-1,5,5a,6,7,7a,8,9,10,11,11a,11b,12,13,13a,13b-hexadecahydrochryseno[1,2-c]furan-3(5bH)-one        | Sesterterpene        | Cytotoxic activity                     | <i>Hyrtios sp.</i> | Paracel Islands,<br>China  | 5 | known |
| (4S,5bR,11aS,13R,13aS,13bR)-4,13-dihydroxy-5b,8,8,11a,13a-pentamethyl-5,5a,5b,6,7,7a,8,9,10,11,11a,11b,12,13,13a,13b-hexadecahydrochryseno[1,2-c]furan-1(4H)-one | Sesterterpene        | Cytotoxic activity                     | <i>Hyrtios sp.</i> | Paracel Islands,<br>China  | 5 | known |
| 16-epi-scalarafuran                                                                                                                                              | Sesterterpene        | Potent inhibitors of<br>TDP-43 protein | <i>Hyrtios sp.</i> | Fiji Islands               | 6 | New   |

|                                                                           |               |                                       |                           |                           |    |       |
|---------------------------------------------------------------------------|---------------|---------------------------------------|---------------------------|---------------------------|----|-------|
| Hemiacetal of 12-deacetyl-cis-24 $\alpha$ ,25 $\alpha$ -dimethoxyscalarin | Sesterterpene | Potent inhibitors of TDP-43 protein   | <i>Hyrtios sp.</i>        | Fiji Islands              | 6  | New   |
| Scalarafuran                                                              | Sesterterpene | Potent inhibitors of TDP-43 protein   | <i>Hyrtios sp.</i>        | Fiji Islands              | 6  | Known |
|                                                                           |               |                                       | <i>Petrosaspongia sp.</i> | Fiji Islands              | 6  |       |
|                                                                           |               |                                       | <i>Hyrtios erectus</i>    | Similan Island, Thailand  | 7  |       |
| 12-deacetyl-cis-24 $\alpha$ ,25 $\alpha$ -dimethoxyscalarin               | Sesterterpene | Potent inhibitors of TDP-43 protein   | <i>Hyrtios sp.</i>        | Fiji Islands              | 6  | Known |
| 12-deacetyl-trans-24 $\alpha$ ,25 $\beta$ -dimethoxyscalarin              | Sesterterpene | Potent inhibitors of TDP-43 protein   | <i>Hyrtios sp.</i>        | Fiji Islands              | 6  | Known |
| Heteronemin                                                               | Sesterterpene | Potent inhibitors of TDP-43 protein   | <i>Hyrtios sp.</i>        | Fiji Islands              | 6  | Known |
|                                                                           |               |                                       | <i>Petrosaspongia sp.</i> | Fiji Islands              | 6  |       |
|                                                                           |               | Cytotoxic activity                    | <i>Hyrtios erectus</i>    | The Red Sea Coast, Jeddah | 8  |       |
|                                                                           |               | Antitubercular & cytotoxic activities | <i>Hyrtios erectus</i>    | The Red Sea, Egypt        | 9  |       |
|                                                                           |               | Cytotoxic activity                    | <i>Hyrtios sp.</i>        | Grand Island              | 10 |       |
|                                                                           |               | Cytotoxic activity                    | <i>Hyrtios sp.</i>        | Paracel Islands, China    | 5  |       |
|                                                                           |               | Cytotoxic activity                    | <i>Hyrtios erectus</i>    | The Red Sea, Egypt        | 11 |       |

|                                  |               |                                                         |                        |                        |    |       |
|----------------------------------|---------------|---------------------------------------------------------|------------------------|------------------------|----|-------|
| Heteronemin acetate              | Sesterterpene | Potent inhibitors of TDP-43 protein                     | <i>Hyrtios sp.</i>     | Fiji Islands           | 6  | Known |
| 12-Deacetyl-12-epi-deoxoscalarin | Sesterterpene | Potent inhibitors of TDP-43 protein                     | <i>Hyrtios sp.</i>     | Fiji Islands           | 6  | Known |
| 12-epi-deoxoscalarin             | Sesterterpene | Potent inhibitors of TDP-43 protein                     | <i>Hyrtios sp.</i>     | Fiji Islands           | 6  | Known |
| Scalarolide                      | Sesterterpene | Potent inhibitors of TDP-43 protein - cytotoxic activit | <i>Hyrtios sp.</i>     | Fiji Islands           | 6  | Known |
|                                  |               | Anti-H. pylori& antitubercular activities               | <i>Hyrtios erectus</i> | The Red Sea, Egypt     | 9  |       |
|                                  |               |                                                         | <i>Hyrtios sp.</i>     | Paracel Islands, China | 5  |       |
|                                  |               | NA                                                      | <i>Hyrtios erectus</i> | The Red Sea, Egypt     | 11 |       |
| 12-episcalaradial                | Sesterterpene | Potent inhibitors of TDP-43 protein                     | <i>Hyrtios sp.</i>     | Fiji Islands           | 6  | Known |

|                                         |                      |                                                                                                                                                                                                                                 |                           |                                  |    |       |
|-----------------------------------------|----------------------|---------------------------------------------------------------------------------------------------------------------------------------------------------------------------------------------------------------------------------|---------------------------|----------------------------------|----|-------|
| 12-Deacetyl-12- <i>epi</i> -scalaradiol | Sesterterpene        | Potent inhibitors of TDP-43 protein - Anti- <i>H. pylori</i> -antitubercular-cytotoxic activities - Cytotoxic against hepatocellular carcinoma (HepG2), colorectal carcinoma (HCT-116) and breast adenocarcinoma cells (MCF-7). | <i>Hyrtios sp.</i>        | Fiji Islands Red Sea             | 6  | Known |
|                                         |                      |                                                                                                                                                                                                                                 | <i>Hyrtios erectus</i>    | The Red Sea, Egypt               | 9  |       |
|                                         |                      |                                                                                                                                                                                                                                 | <i>Hyrtios erectus</i>    | The Red Sea, Egypt               | 12 |       |
| 12-Deacetyl-12,18-diepi-scalaradiol     | Sesterterpene        | Potent inhibitors of TDP-43 protein                                                                                                                                                                                             | <i>Hyrtios sp.</i>        | Fiji Islands                     | 6  | Known |
| Hyrtiosal                               | Sesterterpene        | Potent inhibitors of TDP-43 protein                                                                                                                                                                                             | <i>Hyrtios sp.</i>        | Fiji Islands                     | 6  | Known |
|                                         |                      |                                                                                                                                                                                                                                 | <i>Petrosaspongia sp.</i> | Fiji Islands                     | 6  |       |
| Methyl diacarnate A                     | Terpene              | Potent inhibitors of TDP-43 protein                                                                                                                                                                                             | <i>Hyrtios sp.</i>        | Fiji Islands                     | 6  | Known |
| Hyrtinadines C                          | Nitrogenous compound | Antimicrobial activity                                                                                                                                                                                                          | <i>Hyrtios sp.</i>        | Okinawa                          | 13 | New   |
| Hyrtinadines D                          | Nitrogenous compound | Antimicrobial activity                                                                                                                                                                                                          | <i>Hyrtios sp.</i>        | Okinawa                          | 13 | New   |
| Hyrtiolacton A                          | Meroterpene          | NA                                                                                                                                                                                                                              | <i>Hyrtios sp.</i>        | Yongxing island, South China Sea | 14 | New   |
| Nakijinol F                             | Meroterpene          | NA                                                                                                                                                                                                                              | <i>Hyrtios sp.</i>        | Yongxing island, South China Sea | 14 | New   |

|                                                    |                      |                                                                                        |                         |                                         |    |       |
|----------------------------------------------------|----------------------|----------------------------------------------------------------------------------------|-------------------------|-----------------------------------------|----|-------|
| Nakijinol G                                        | Meroterpene          | Protein tyrosine phosphatase (PTP1B) inhibitory activity                               | <i>Hyrtios sp.</i>      | Yongxing island, South China Sea        | 14 | New   |
| Nakijinol B                                        | Meroterpene          | NA                                                                                     | <i>Hyrtios sp.</i>      | Yongxing island, South China Sea        | 14 | Known |
| Dactyloquinone A                                   | Meroterpene          | NA                                                                                     | <i>Hyrtios sp.</i>      | Yongxing island, South China Sea        | 14 | Known |
| 15 $\alpha$ -Methoxypuupehenol                     | Merosesquiterpene    | Cytotoxic due to antitumor effects against human glioblastoma (GBM) and breast cancer. | <i>Hyrtios sp.</i>      | Haleiwa Trench, the North Shore of Oahu | 15 | Known |
| Hyrtiodoline A                                     | Nitrogenous compound | Antitrypanosomal activity                                                              | <i>Hyrtios sp.</i>      | Sharm el-Sheikh, Egypt.                 | 16 | New   |
| 4-Hydroxy-1H-indole-6-carboxylic acid methyl ester | Nitrogenous compound | NA                                                                                     | <i>Hyrtios sp.</i>      | Sharm el-Sheikh, Egypt.                 | 16 | known |
| Dimer of indole-3-carbaldehyde                     | Nitrogenous compound | NA                                                                                     | <i>Hyrtios sp.</i>      | Sharm el-Sheikh, Egypt.                 | 16 | known |
| 3-Methylene hydroxy $\beta$ -carboline             | Nitrogenous compound | NA                                                                                     | <i>Hyrtios sp.</i>      | Sharm el-Sheikh, Egypt.                 | 16 | known |
| 2,3-Dibromo-4-hydroxybenzaldehyde                  | Halogenated compound | NA                                                                                     | <i>Hyrtios sp.</i>      | Sharm el-Sheikh, Egypt.                 | 16 | known |
| Thorectidaeolide A                                 | Sesterterpene        | HIF-1 inhibitory activity                                                              | <i>Hyrtios communis</i> | The coast of Palau                      | 17 | New   |
| 4-Acetoxythorectidaeolide A                        | Sesterterpene        | HIF-1 inhibitory activity                                                              | <i>Hyrtios communis</i> | The coast of Palau                      | 17 | New   |
| Thorectidaeolide B                                 | Sesterterpene        | HIF-1 inhibitory activity                                                              | <i>Hyrtios communis</i> | The coast of Palau                      | 17 | New   |
| Thorectidaeolide C                                 | Sesterterpene        | HIF-1 inhibitory activity                                                              | <i>Hyrtios communis</i> | The coast of Palau                      | 17 | New   |
| Thorectidaeolide D                                 | Sesterterpene        | HIF-1 inhibitory activity                                                              | <i>Hyrtios communis</i> | The coast of Palau                      | 17 | New   |

|                                                                                                                    |                      |                                                          |                         |                           |    |       |
|--------------------------------------------------------------------------------------------------------------------|----------------------|----------------------------------------------------------|-------------------------|---------------------------|----|-------|
| Thorectidaelolide E                                                                                                | Sesterterpene        | HIF-1 inhibitory activity                                | <i>Hyrtios communis</i> | The coast of Palau        | 17 | New   |
| Acantholide C                                                                                                      | Sesterterpene        | HIF-1 inhibitory activity                                | <i>Hyrtios communis</i> | The coast of Palau        | 17 | Known |
| Acantholide B                                                                                                      | Sesterterpene        | HIF-1 inhibitory activity                                | <i>Hyrtios communis</i> | The coast of Palau        | 17 | Known |
| 16-Hydroxyluffariellolide                                                                                          | Sesterterpene        | HIF-1 inhibitory activity                                | <i>Hyrtios communis</i> | The coast of Palau        | 17 | Known |
| Acantholide A                                                                                                      | Sesterterpene        | HIF-1 inhibitory activity                                | <i>Hyrtios communis</i> | The coast of Palau        | 17 | Known |
| Luffariellolide                                                                                                    | Sesterterpene        | HIF-1 inhibitory activity and antiproliferative activity | <i>Hyrtios communis</i> | The coast of Palau        | 17 | Known |
| Hainanerectamine A                                                                                                 | Nitrogenous compound | NA                                                       | <i>Hyrtios erecta.</i>  | Hainan Province, China    | 18 | New   |
| Hainanerectamine B                                                                                                 | Nitrogenous compound | Inhibitory activity against Aurora A                     | <i>Hyrtios erecta.</i>  | Hainan Province, China    | 18 | New   |
| (-)-(1R*, 3R*)-6-hydroxy-1-(4-methylene-1H-imidazole)-2,3,4,9-tetrahydro-1H- $\beta$ -carboline-3-carboxylic acid. | Nitrogenous compound | Inhibitory activity against Aurora A                     | <i>Hyrtios erecta.</i>  | Hainan Province, China    | 18 | Known |
| Hainanerectamine C                                                                                                 | Nitrogenous compound | Inhibitory activity against Aurora A                     | <i>Hyrtios erecta.</i>  | Hainan Province, China    | 18 | New   |
| 5-Hydroxyindole-3-carbaldehyde                                                                                     | Nitrogenous compound | NA                                                       | <i>Hyrtios erecta.</i>  | Hainan Province, China    | 18 | Known |
| 5-Hydroxyindole-3-carboxylic acid                                                                                  | Nitrogenous compound | NA                                                       | <i>Hyrtios erecta.</i>  | Hainan Province, China    | 18 | Known |
| 5-Hydroxy-3-(2-hydroxyethyl)-indole                                                                                | Nitrogenous compound | NA                                                       | <i>Hyrtios erecta.</i>  | Hainan Province, China    | 18 | Known |
| 5-Hydroxytryptophan                                                                                                | Nitrogenous compound | NA                                                       | <i>Hyrtios erecta.</i>  | Hainan Province, China    | 18 | Known |
| Scalarinol                                                                                                         | Sesterterpene        | Cytotoxic activity                                       | <i>Hyrtios erectus</i>  | The Red Sea Coast, Jeddah | 8  | New   |
| 12-O-deacetyl-19-deoxyscalarin                                                                                     | Sesterterpene        | Cytotoxic activity                                       | <i>Hyrtios erectus</i>  | The Red Sea Coast, Jeddah | 8  | known |
| 5 $\alpha$ , 8 $\alpha$ -epidioxy-24-methylcholesta-6-en-3 $\beta$ -ol                                             | Sterol               | NA                                                       | <i>Hyrtios erectus</i>  | The Red Sea Coast, Jeddah | 8  | known |



|                                                                      |               |                                                    |                        |                    |    |       |
|----------------------------------------------------------------------|---------------|----------------------------------------------------|------------------------|--------------------|----|-------|
| 12-Acetoxy,16-epi-hyrtiolide                                         | Sesterterpene | Cytotoxic activity                                 | <i>Hyrtios erectus</i> | The Red Sea, Egypt | 11 | New   |
|                                                                      |               | Anti-H. pylori-antitubercular-cytotoxic activities | <i>Hyrtios erectus</i> | The Red Sea, Egypt | 9  |       |
| 12 -Acetoxy,16 -methoxy,20 -hydroxy-17-scalaren-19,20-olide          | Sesterterpene | Cytotoxic activity                                 | <i>Hyrtios erectus</i> | The Red Sea, Egypt | 11 | New   |
| 12 $\beta$ ,20-Dihydroxy-16 $\beta$ -acetoxy-17-scalaren-19,20-olide | Sesterterpene | Cytotoxic activity                                 | <i>Hyrtios erectus</i> | The Red Sea, Egypt | 11 | known |
| Sesterstatin 7                                                       | Sesterterpene | Cytotoxic activity                                 | <i>Hyrtios erectus</i> | The Red Sea, Egypt | 11 | known |
|                                                                      |               | Anti-H. pylori-antitubercular-cytotoxic activities | <i>Hyrtios erectus</i> | The Red Sea, Egypt | 9  |       |
| 12- <i>epi</i> -24-deoxyscalarin                                     | Sesterterpene | Cytotoxic activity                                 | <i>Hyrtios erectus</i> | The Red Sea, Egypt | 11 | known |
|                                                                      |               | Anti-H. pylori-antitubercular-cytotoxic activities | <i>Hyrtios erectus</i> | The Red Sea, Egypt | 9  |       |
| Scalarolide acetate                                                  | Sesterterpene | Cytotoxic activity                                 | <i>Hyrtios erectus</i> | The Red Sea, Egypt | 11 | known |
|                                                                      |               | Anti-H. pylori-antitubercular-cytotoxic activities | <i>Hyrtios erectus</i> | The Red Sea, Egypt | 9  |       |
| 12-deacetyl-12,18-di- <i>epi</i> -scalaradial                        | Sesterterpene | Cytotoxic activity                                 | <i>Hyrtios erectus</i> | The Red Sea, Egypt | 11 | known |

|                                                                                |               |                                                                                                                                      |                        |                    |    |       |
|--------------------------------------------------------------------------------|---------------|--------------------------------------------------------------------------------------------------------------------------------------|------------------------|--------------------|----|-------|
| 24-Methoxypetrosaspongia C                                                     | Sesterterpene | Cytotoxic against hepatocellular carcinoma (HepG2), colorectal carcinoma (HCT-116) and breast adenocarcinoma cells (MCF-7).activity  | <i>Hyrtios erectus</i> | The Red Sea, Egypt | 12 | New   |
|                                                                                |               | Anti-H. pylori-antitubercular-cytotoxic activity                                                                                     | <i>Hyrtios erectus</i> | The Red Sea, Egypt | 9  |       |
| Sesterstatin 3                                                                 | Sesterterpene | Cytotoxic against hepatocellular carcinoma (HepG2), colorectal carcinoma (HCT-116) and breast adenocarcinoma cells (MCF-7) activity. | <i>Hyrtios erectus</i> | The Red Sea, Egypt | 12 | Known |
|                                                                                |               | Anti-H. pylori-antitubercular-cytotoxic activity                                                                                     |                        |                    | 9  |       |
| 12-Deacetyl-12,18-di- <i>epi</i> -scalaradial                                  | Sesterterpene | Cytotoxic against hepatocellular carcinoma (HepG2), colorectal carcinoma (HCT-116) and breast adenocarcinoma cells (MCF-7) activity  | <i>Hyrtios erectus</i> | The Red Sea, Egypt | 12 | Known |
|                                                                                |               | Anti-H. pylori-antitubercular-cytotoxic activity                                                                                     | <i>Hyrtios erectus</i> | The Red Sea, Egypt | 9  |       |
| 19 Acetylsesterstatin 3                                                        | Sesterterpene | Anti-H. pylori-antitubercular                                                                                                        | <i>Hyrtios erectus</i> | The Red Sea, Egypt | 9  | Known |
| 12 $\beta$ ,20 $\alpha$ -Dihydroxy-16 $\beta$ -acetoxy-17-scalaren-19,20-olide | Sesterterpene | Anti-H. pylori-antitubercular-cytotoxic activities                                                                                   | <i>Hyrtios erectus</i> | The Red Sea, Egypt | 9  | Known |
| 12- <i>O</i> -Acetyl-16- <i>O</i> -methylhyrtiolide                            | Sesterterpene | Anti-H. pylori-antitubercular-cytotoxic activities                                                                                   | <i>Hyrtios erectus</i> | The Red Sea, Egypt | 9  | Known |

|                                                                                      |                        |                                                    |                        |                                              |    |       |
|--------------------------------------------------------------------------------------|------------------------|----------------------------------------------------|------------------------|----------------------------------------------|----|-------|
| 12 $\beta$ -Acetoxy,16 $\beta$ -methoxy,20 $\alpha$ -hydroxy-17-scalarin-19,20-olide | Sesterterpene          | Anti-H. pylori-antitubercular-cytotoxic activities | <i>Hyrtios erectus</i> | The Red Sea, Egypt                           | 9  | Known |
| 12-O-Deacetyl-12,19-di- <i>epi</i> -scalarin                                         | Sesterterpene          | Anti-H. pylori & antitubercular activities         | <i>Hyrtios erectus</i> | The Red Sea, Egypt                           | 9  | New   |
| Smenotronic acid                                                                     | Sesquiterpene          | Antimalarial activity                              | <i>Hyrtios erectus</i> | Chuuk Island, Federated States of Micronesia | 19 | Known |
| Erectusolide B                                                                       | Sesterterpene          | NA                                                 | <i>Hyrtios erectus</i> | Similan Island, Thailand                     | 7  | New   |
| Erectusolide C                                                                       | Sesterterpene          | NA                                                 | <i>Hyrtios erectus</i> | Similan Island, Thailand                     | 7  | New   |
| Erectusolide D                                                                       | Sesterterpene          | Cytotoxic activity                                 | <i>Hyrtios erectus</i> | Similan Island, Thailand                     | 7  | New   |
| Seco-manoalide-25-methyl ether                                                       | Sesterterpene          | NA                                                 | <i>Hyrtios erectus</i> | Similan Island, Thailand                     | 7  | New   |
| Erectusfuranone A                                                                    | Miscellaneous compound | Cytotoxic activity                                 | <i>Hyrtios erectus</i> | Similan Island, Thailand                     | 7  | New   |
| Erectusfuranone B                                                                    | Miscellaneous compound | NA                                                 | <i>Hyrtios erectus</i> | Similan Island, Thailand                     | 7  | New   |
| (6Z)-neomanoalide-24-acetate                                                         | Sesterterpene          | Cytotoxic activity                                 | <i>Hyrtios erectus</i> | Similan Island, Thailand                     | 7  | Known |
| 24-O-Methylmanoalide                                                                 | Sesterterpene          | Cytotoxic activity                                 | <i>Hyrtios erectus</i> | Similan Island, Thailand                     | 7  | Known |
| Luffariolide B                                                                       | Sesterterpene          | Cytotoxic activity                                 | <i>Hyrtios erectus</i> | Similan Island, Thailand                     | 7  | Known |
| Manoalide                                                                            | Sesterterpene          | Cytotoxic activity                                 | <i>Hyrtios erectus</i> | Similan Island, Thailand                     | 7  | Known |
| (6E)- and (6Z)-neomanoalide                                                          | Sesterterpene          | Cytotoxic activity                                 | <i>Hyrtios erectus</i> | Similan Island, Thailand                     | 7  | Known |

|                                     |                        |                                                                                             |                                |                                     |    |       |
|-------------------------------------|------------------------|---------------------------------------------------------------------------------------------|--------------------------------|-------------------------------------|----|-------|
| Seco-manoolide                      | Sesterterpene          | Cytotoxic activity                                                                          | <i>Hyrtios erectus</i>         | Similan Island, Thailand            | 7  | Known |
| Cavernosine                         | Sesterterpene          | Cytotoxic activity - Antimicrobial activity                                                 | <i>Hyrtios erectus</i>         | Similan Island, Thailand            | 7  | Known |
|                                     |                        |                                                                                             | <i>Fasciospongia cavernosa</i> |                                     | 20 |       |
| 12-Acetylscalarolide                | Sesterterpene          | Cytotoxic activity                                                                          | <i>Hyrtios erectus</i>         | Similan Island, Thailand            | 7  | Known |
| 12-epi-O-deacetyl-19- deoxyscalarin | Sesterterpene          | Cytotoxic activity                                                                          | <i>Hyrtios erectus</i>         | Similan Island, Thailand            | 7  | Known |
| 12-epi-scalarin                     | Sesterterpene          | Cytotoxic activity                                                                          | <i>Hyrtios erectus</i>         | Similan Island, Thailand            | 7  | Known |
| 12-O-deacetyl-12-epi-scalarin       | Sesterterpene          | Cytotoxic activity                                                                          | <i>Hyrtios erectus</i>         | Similan Island, Thailand            | 7  | Known |
| 5-hydroxy-1H-indole-3-carbaldehyde  | Nitrogenous compound   | NA                                                                                          | <i>Hyrtios erectus</i>         | Similan Island, Thailand            | 7  | Known |
| Hyrtiosine A                        | Nitrogenous compound   | NA                                                                                          | <i>Hyrtios erectus</i>         | Similan Island, Thailand            | 7  | Known |
| Variabine B                         | Nitrogenous compound   | Cytotoxic activity                                                                          | <i>Hyrtios erectus</i>         | Similan Island, Thailand            | 7  | Known |
|                                     |                        | Inhibition of chymotrypsin-like activity of the proteasome and Ubc13 (E2)-Uev1A interaction | <i>Luffariella variabilis</i>  | North Sulawesi, Indonesia           | 21 |       |
| 4'-Methylheptyl benzoate            | Miscellaneous compound | Cytotoxic activity                                                                          | <i>Hyrtios erectus</i>         | Red Sea coast, Jeddah, Saudi Arabia | 22 | New   |

|                                                                       |                           |                                     |                               |                                     |    |       |
|-----------------------------------------------------------------------|---------------------------|-------------------------------------|-------------------------------|-------------------------------------|----|-------|
| 3- $\beta$ -Hydroxycholest-5-en-7-one                                 | Oxysterol                 | Cytotoxic activity                  | <i>Hyrtios erectus</i>        | Red Sea coast, Jeddah, Saudi Arabia | 22 | Known |
| 1H-indole-3-carbaldehyde                                              | Nitrogenous compound      | NA                                  | <i>Hyrtios erectus</i>        | Red Sea coast, Jeddah, Saudi Arabia | 22 | Known |
| Tryptoline                                                            | Nitrogenous compound      | NA                                  | <i>Hyrtios erectus</i>        | Red Sea coast, Jeddah, Saudi Arabia | 22 | Known |
| 6-Hydroxy-1,2,3,4-tetrahydro-9H- $\beta$ -carboline-3-carboxylic acid | Nitrogenous compound      | NA                                  | <i>Hyrtios erectus</i>        | Red Sea coast, Jeddah, Saudi Arabia | 22 | Known |
| Hyrtioreticulin B                                                     | Nitrogenous compound      | NA                                  | <i>Hyrtios erectus</i>        | Red Sea coast, Jeddah, Saudi Arabia | 22 | Known |
| 19-Methoxy-9,15-ene-puupehenol                                        | Merosesquiterpene         | Atherosclerosis inhibitor           | <i>Hyrtios digitatus</i>      | Australia                           | 23 | New   |
| 20-Methoxy-9,15-ene-puupehenol                                        | Merosesquiterpene         | Atherosclerosis inhibitor           | <i>Hyrtios digitatus</i>      | Australia                           | 23 | Known |
| Petrosaspongiolactam A                                                | Sesterterpene             | Potent inhibitors of TDP-43 protein | <i>Petrosaspongia species</i> | Fiji Islands                        | 6  | New   |
| Petrosaspongiolactam B                                                | Sesterterpene             | Potent inhibitors of TDP-43 protein | <i>Petrosaspongia species</i> | Fiji Islands                        | 6  | New   |
| Petrosaspongiolactam C                                                | Sesterterpene             | NA                                  | <i>Petrosaspongia species</i> | Fiji Islands                        | 6  | New   |
| Scalarolbutenolide                                                    | Sesterterpene             | Potent inhibitors of TDP-43 protein | <i>Petrosaspongia species</i> | Fiji Islands                        | 6  | Known |
| Episcalarolbutenolide                                                 | Sesterterpene             | Potent inhibitors of TDP-43 protein | <i>Petrosaspongia species</i> | Fiji Islands                        | 6  | Known |
| Smenamide A                                                           | Hybrid peptide/polyketide | Cytotoxic activity                  | <i>Smenospongia aurea</i>     | Bahamas Islands                     | 24 | New   |
|                                                                       |                           | NA                                  | <i>Smenospongia conulosa</i>  |                                     | 25 |       |
| Smenamide B                                                           | Hybrid peptide/polyketide | Cytotoxic activity                  | <i>Smenospongia aurea</i>     | Bahamas Islands                     | 24 | New   |
|                                                                       |                           | NA                                  | <i>Smenospongia conulosa</i>  |                                     | 25 |       |

|                                                    |                           |                            |                                                                                                             |                                             |    |     |
|----------------------------------------------------|---------------------------|----------------------------|-------------------------------------------------------------------------------------------------------------|---------------------------------------------|----|-----|
| (E)-10-Benzyl-5,7-dimethylundeca-1,5,10-trien-4-ol | Miscellaneous compound    | Cytotoxic activity         | Mixture of three sponges, <i>Smenospongia aurea</i> , <i>S. cerebriformis</i> , and <i>Verongula rigida</i> | Florida                                     | 26 | New |
| Smenothiazole A                                    | Hybrid peptide/polyketide | Cytotoxic activity         | <i>Smenospongia aurea</i>                                                                                   | Bahamas Islands                             | 27 | New |
|                                                    |                           | NA                         | <i>Smenospongia conulosa</i>                                                                                |                                             | 25 |     |
| Smenothiazole B                                    | Hybrid peptide/polyketide | Cytotoxic activity         | <i>Smenospongia aurea</i>                                                                                   | Bahamas Islands                             | 27 | New |
|                                                    |                           | NA                         | <i>Smenospongia conulosa</i>                                                                                |                                             | 25 |     |
| (-)-Nakijinol E                                    | Sesquiterpene             | NA                         | <i>Smenospongia aurea</i> and <i>S.cerebriformis</i>                                                        | Key Largo, Florida                          | 28 | New |
| (+)-5-epi-Nakijinol E                              | Sesquiterpene             | Cytotoxic activity         | <i>Smenospongia aurea</i> and <i>S.cerebriformis</i>                                                        | Key Largo, Florida                          | 28 | New |
| Mixture of nakijinone A and 5-epi-nakijinone A     | Sesquiterpene             | Cytotoxic activity         | <i>Smenospongia aurea</i> and <i>S.cerebriformis</i>                                                        | Key Largo, Florida                          | 28 | New |
| (-)-Dactylospongenone E                            | Sesquiterpene             | NA                         | <i>Smenospongia aurea</i> and <i>S.cerebriformis</i>                                                        | Key Largo, Florida                          | 28 | New |
| Mixture of 5-epi-dactylospongenones E and F        | Sesquiterpene             | NA                         | <i>Smenospongia aurea</i> and <i>S.cerebriformis</i>                                                        | Key Largo, Florida                          | 28 | New |
| (+)-5-epi-20-O-Ethylsmenoquinone                   | Sesquiterpene             | Cytotoxic activity         | <i>Smenospongia aurea</i> and <i>S.cerebriformis</i>                                                        | Key Largo, Florida                          | 28 | New |
| Smenopyrone                                        | Miscellaneous compound    | NA                         | <i>Smenospongia aurea</i>                                                                                   | The coast of Great Inagua (Bahamas Islands) | 29 | New |
| Smenolactone A                                     | Polyketide                | Antiproliferative activity | <i>Smenospongia aurea</i> .                                                                                 | Mayaguana Island, Bahamas                   | 30 | New |
| Smenolactone B                                     | Polyketide                | Antiproliferative activity | <i>Smenospongia aurea</i> .                                                                                 | Mayaguana Island, Bahamas                   | 30 | New |
| Smenolactone C                                     | Polyketide                | Antiproliferative activity | <i>Smenospongia aurea</i> .                                                                                 | Mayaguana Island, Bahamas                   | 30 | New |
| Smenolactone D                                     | Polyketide                | Antiproliferative activity | <i>Smenospongia aurea</i> .                                                                                 | Mayaguana Island, Bahamas                   | 30 | New |

|                     |                           |                                                                                                                                                                                           |                                   |                                  |    |       |
|---------------------|---------------------------|-------------------------------------------------------------------------------------------------------------------------------------------------------------------------------------------|-----------------------------------|----------------------------------|----|-------|
| Conulothiazoles A   | Hybrid peptide/polyketide | NA                                                                                                                                                                                        | <i>Smenospongia conulosa</i>      | Bahamas Islands                  | 25 | New   |
| Conulothiazoles B   | Hybrid peptide/polyketide | NA                                                                                                                                                                                        | <i>Smenospongia conulosa</i>      | Bahamas Islands                  | 25 | New   |
| Smenocerone A       | Miscellaneous compound    | NA                                                                                                                                                                                        | <i>Smenospongia cerebriformis</i> | Eastern Sea of Quangtri, Vietnam | 31 | New   |
| Smenocerone B       | Miscellaneous compound    | Cytotoxic activity towards lung carcinoma (LU-1), hepatocellular carcinoma (HepG-2), promyelocytic leukemia (HL-60), breast carcinoma (MCF-7), and melanoma (SK-Mel-2) human cancer cells | <i>Smenospongia cerebriformis</i> | Eastern Sea of Quangtri, Vietnam | 31 | New   |
| Dactylospongenone A | Sesquiterpene             | NA                                                                                                                                                                                        | <i>Smenospongia cerebriformis</i> | Eastern Sea of Quangtri, Vietnam | 31 | Known |
| Dactylospongenone B | Sesquiterpene             | NA                                                                                                                                                                                        | <i>Smenospongia cerebriformis</i> | Eastern Sea of Quangtri, Vietnam | 31 | Known |
| Dactylospongenone C | Sesquiterpene             | NA                                                                                                                                                                                        | <i>Smenospongia cerebriformis</i> | Eastern Sea of Quangtri, Vietnam | 31 | Known |
| Dactylospongenone D | Sesquiterpene             | NA                                                                                                                                                                                        | <i>Smenospongia cerebriformis</i> | Eastern Sea of Quangtri, Vietnam | 31 | Known |
| Smenohaimien A      | Sesquiterpene             | Anti-inflammatory activity                                                                                                                                                                | <i>Smenospongia cerebriformis</i> | Vinhmoc, Quangtri                | 32 | New   |
| Smenohaimien B      | Sesquiterpene             | Anti-inflammatory activity                                                                                                                                                                | <i>Smenospongia cerebriformis</i> | Vinhmoc, Quangtri                | 32 | New   |

|                                           |                      |                               |                                   |                                                   |    |       |
|-------------------------------------------|----------------------|-------------------------------|-----------------------------------|---------------------------------------------------|----|-------|
| Smenohaimien C                            | Sesquiterpene        | Anti-inflammatory activity    | <i>Smenospongia cerebriformis</i> | Vinhmoc, Quangtri                                 | 32 | New   |
| Smenohaimien D                            | Sesquiterpene        | Anti-inflammatory activity    | <i>Smenospongia cerebriformis</i> | Vinhmoc, Quangtri                                 | 32 | New   |
| Smenohaimien E                            | Sesquiterpene        | Anti-inflammatory activity    | <i>Smenospongia cerebriformis</i> | Vinhmoc, Quangtri                                 | 32 | New   |
| 19-Hydroxy-polyfibrospongol B             | Sesquiterpene        | Anti-inflammatory activity    | <i>Smenospongia cerebriformis</i> | Vinhmoc, Quangtri                                 | 32 | Known |
| Polyfibrospongol B                        | Sesquiterpene        | Anti-inflammatory activity    | <i>Smenospongia cerebriformis</i> | Vinhmoc, Quangtri                                 | 32 | Known |
| Smenohaimien F                            | Sesquiterpene        | Cytotoxic activity            | <i>Smenospongia cerebriformis</i> | Quang Tri, Vietnam                                | 33 | New   |
| Neodactyloquinone                         | Sesquiterpene        | NA                            | <i>Smenospongia cerebriformis</i> | Quang Tri, Vietnam                                | 33 | Known |
| Dactyloquinone C                          | Sesquiterpene        | Cytotoxic activity (moderate) | <i>Smenospongia cerebriformis</i> | Quang Tri, Vietnam                                | 33 | Known |
| Dactyloquinone D                          | Sesquiterpene        | Cytotoxic activity (moderate) | <i>Smenospongia cerebriformis</i> | Quang Tri, Vietnam                                | 33 | Known |
| Isoamijiol                                | Sesquiterpene        | NA                            | <i>Smenospongia cerebriformis</i> | Quang Tri, Vietnam                                | 33 | Known |
| Amijiol                                   | Sesquiterpene        | NA                            | <i>Smenospongia cerebriformis</i> | Quang Tri, Vietnam                                | 33 | Known |
| Fasciospyrinadine                         | Sesquiterpene        | NA                            | <i>Fasciospongia sp.</i>          | Weizhou Island, Guangxi Autonomous Region, China. | 34 | New   |
| Secomanoalide                             | Sesterterpene        | Antimicrobial activity        | <i>Fasciospongia cavernosa</i>    | Not detected                                      | 20 | known |
| 4E,6E-dehydromanoalide                    | Sesterterpene        | Antimicrobial activity        | <i>Fasciospongia cavernosa</i>    | Not detected                                      | 20 | known |
| 5-Hydroxyindole-3-glyoxylate methyl ester | Nitrogenous compound | Cytotoxic activity            | <i>Scalarispongia sp.</i>         | Dokdo island, Republic of Korea                   | 35 | New   |
| Hyrtinadine B                             | Nitrogenous compound | Cytotoxic activity            | <i>Scalarispongia sp.</i>         | Dokdo island, Republic of Korea                   | 35 | New   |
| Scalaridine A                             | Nitrogenous compound | Cytotoxic activity            | <i>Scalarispongia sp.</i>         | Dokdo island, Republic of Korea                   | 35 | New   |



|                                                             |                      |                    |                           |                                       |    |       |
|-------------------------------------------------------------|----------------------|--------------------|---------------------------|---------------------------------------|----|-------|
| Hyrniosin A                                                 | Nitrogenous compound | Cytotoxic activity | <i>Scalarispongia sp.</i> | Dokdo island,<br>Republic of<br>Korea | 35 | Known |
| 5-Hydroxytryprophol                                         | Nitrogenous compound | Cytotoxic activity | <i>Scalarispongia sp.</i> | Dokdo island,<br>Republic of<br>Korea | 35 | Known |
| 5-Hydroxy-1H-indole-3-<br>carboxylic acid methyl ester      | Nitrogenous compound | Cytotoxic activity | <i>Scalarispongia sp.</i> | Dokdo island,<br>Republic of<br>Korea | 35 | Known |
| 5-Hydroxyindole-3- carbaldehyde                             | Nitrogenous compound | Cytotoxic activity | <i>Scalarispongia sp.</i> | Dokdo island,<br>Republic of<br>Korea | 35 | Known |
| Hyrniosin B                                                 | Nitrogenous compound | Cytotoxic activity | <i>Scalarispongia sp.</i> | Dokdo island,<br>Republic of<br>Korea | 35 | Known |
| Hyrtinadine A                                               | Nitrogenous compound | Cytotoxic activity | <i>Scalarispongia sp.</i> | Dokdo island,<br>Republic of<br>Korea | 35 | Known |
| Begonanline                                                 | Nitrogenous compound | Cytotoxic activity | <i>Scalarispongia sp.</i> | Dokdo island,<br>Republic of<br>Korea | 35 | Known |
| Scalarin                                                    | Sesterterpene        | Cytotoxic activity | <i>Scalarispongia sp.</i> | Dokdo island,<br>Republic of<br>Korea | 36 | Known |
| 12- <i>epi</i> -12-O-acetylscalarolide                      | Sesterterpene        | Cytotoxic activity | <i>Scalarispongia sp.</i> | Dokdo island,<br>Republic of<br>Korea | 36 | Known |
| 12-O-Acetyl-12,16- <i>epi</i> -scalarolbutenolide           | Sesterterpene        | Cytotoxic activity | <i>Scalarispongia sp.</i> | Dokdo island,<br>Republic of<br>Korea | 36 | Known |
| 12 $\alpha$ - Acetoxy-16 $\beta$ -hydroxyscalarolbutenolide | Sesterterpene        | Cytotoxic activity | <i>Scalarispongia sp.</i> | Dokdo island,<br>Republic of<br>Korea | 36 | Known |

|                                                                                                                                                                                                                                                                                                                              |               |                                                                                      |                           |                                         |    |       |
|------------------------------------------------------------------------------------------------------------------------------------------------------------------------------------------------------------------------------------------------------------------------------------------------------------------------------|---------------|--------------------------------------------------------------------------------------|---------------------------|-----------------------------------------|----|-------|
| 16- <i>O</i> -Deacetyl-12,16-epi-scalarolbutanolide                                                                                                                                                                                                                                                                          | Sesterterpene | NA                                                                                   | <i>Scalarispongia sp.</i> | Dokdo island,<br>Republic of<br>Korea   | 36 | New   |
| (4 <i>S</i> ,5 <i>bR</i> ,11 <i>aS</i> ,13 <i>aS</i> ,13 <i>bR</i> )-5 <i>b</i> ,8,8,11 <i>a</i> ,13 <i>a</i> -<br>pentamethyl-2-oxo-<br>2,4,5,5 <i>a</i> ,5 <i>b</i> ,6,7,7 <i>a</i> ,8,9,10,11,11 <i>a</i> ,11 <i>b</i> ,12,13,13 <i>a</i> ,1<br>3 <i>b</i> -octadecahydrochryseno[1,2- <i>b</i> ]furan-4-yl<br>acetate    | Sesterterpene | Cytotoxic activity                                                                   | <i>Scalarispongia sp.</i> | Dokdo island,<br>Republic of<br>Korea   | 36 | New   |
| (4 <i>S</i> ,5 <i>bR</i> ,11 <i>aS</i> ,13 <i>aS</i> ,13 <i>bR</i> )-4-hydroxy-<br>5 <i>b</i> ,8,8,11 <i>a</i> ,13 <i>a</i> -pentamethyl-<br>5,5 <i>a</i> ,5 <i>b</i> ,6,7,7 <i>a</i> ,8,9,10,11,11 <i>a</i> ,11 <i>b</i> ,12,13,13 <i>a</i> ,13 <i>b</i> -<br>hexadecahydrochryseno[1,2- <i>b</i> ]furan-2(4 <i>H</i> )-one | Sesterterpene | Cytotoxic activity                                                                   | <i>Scalarispongia sp.</i> | Dokdo island,<br>Republic of<br>Korea   | 36 | New   |
| (4 <i>aS</i> ,6 <i>S</i> ,6 <i>aR</i> ,10 <i>bR</i> )-8-(hydroxymethyl)-<br>1,1,4 <i>a</i> ,6 <i>a</i> ,10 <i>b</i> -pentamethyl-9-oxo-<br>1,2,3,4,4 <i>a</i> ,4 <i>b</i> ,5,6,6 <i>a</i> ,9,10,10 <i>a</i> ,10 <i>b</i> ,11,12,12 <i>a</i> -<br>hexadecahydrochrysen-6-yl acetate                                           | Sesterterpene | Cytotoxic activity                                                                   | <i>Scalarispongia sp.</i> | Dokdo island,<br>Republic of<br>Korea   | 36 | New   |
| Isoscalarafuran A                                                                                                                                                                                                                                                                                                            | Sesterterpene | NA                                                                                   | <i>Scalarispongia sp.</i> | Dokdo (island),<br>Republic of<br>Korea | 37 | Known |
| Furoscalarol                                                                                                                                                                                                                                                                                                                 | Sesterterpene | NA                                                                                   | <i>Scalarispongia sp.</i> | Dokdo (island),<br>Republic of<br>Korea | 37 | Known |
| (5 <i>bR</i> ,11 <i>aS</i> ,13 <i>S</i> ,13 <i>aR</i> )-5 <i>b</i> ,8,8,11 <i>a</i> ,13 <i>a</i> -<br>pentamethyl-4-oxo-<br>4,5,5 <i>a</i> ,5 <i>b</i> ,6,7,7 <i>a</i> ,8,9,10,11,11 <i>a</i> ,11 <i>b</i> ,12,13,13 <i>a</i> -<br>hexadecahydrochryseno[1,2- <i>b</i> ]furan-13-yl<br>acetate                               | Sesterterpene | Cytotoxic activity                                                                   | <i>Scalarispongia sp.</i> | Dokdo (island),<br>Republic of<br>Korea | 37 | Known |
| (5 <i>bR</i> ,11 <i>aS</i> ,13 <i>S</i> ,13 <i>aS</i> )-5 <i>b</i> ,8,8,11 <i>a</i> ,13 <i>a</i> -<br>pentamethyl-4-oxo-<br>4,5,5 <i>a</i> ,5 <i>b</i> ,6,7,7 <i>a</i> ,8,9,10,11,11 <i>a</i> ,11 <i>b</i> ,12,13,13 <i>a</i> -<br>hexadecahydro-1 <i>H</i> -phenanthro[1,2- <i>g</i> ]indol-13-yl<br>acetate                | Sesterterpene | Cytotoxic activity                                                                   | <i>Scalarispongia sp.</i> | Dokdo (island),<br>Republic of<br>Korea | 37 | New   |
| Scalaradial                                                                                                                                                                                                                                                                                                                  | Sesterterpene | Inhibitor of Transient<br>Receptor Potential<br>Melastatin 2 (TRPM2)<br>Ion Channels | <i>Cacospongia sp.</i>    | Pupukea, Beach<br>Park, Oahu,<br>Hawaii | 38 | Known |

|                          |               |                                                                             |                        |                                   |    |       |
|--------------------------|---------------|-----------------------------------------------------------------------------|------------------------|-----------------------------------|----|-------|
| 12-Deacetylscalaradial   | Sesterterpene | Inhibitor of Transient Receptor Potential Melastatin 2 (TRPM2) Ion Channels | <i>Cacospongia sp.</i> | Pupukea, Beach Park, Oahu, Hawaii | 38 | Known |
| Cacolide A               | Sesterterpene | NA                                                                          | <i>Cacospongia sp.</i> | Australia                         | 39 | New   |
| Cacolide B               | Sesterterpene | NA                                                                          | <i>Cacospongia sp.</i> | Australia                         | 39 | New   |
| Cacolide C               | Sesterterpene | NA                                                                          | <i>Cacospongia sp.</i> | Australia                         | 39 | New   |
| Cacolide D               | Sesterterpene | NA                                                                          | <i>Cacospongia sp.</i> | Australia                         | 39 | New   |
| Cacolide E               | Sesterterpene | NA                                                                          | <i>Cacospongia sp.</i> | Australia                         | 39 | New   |
| Cacolide F               | Sesterterpene | NA                                                                          | <i>Cacospongia sp.</i> | Australia                         | 39 | New   |
| Cacolide G               | Sesterterpene | NA                                                                          | <i>Cacospongia sp.</i> | Australia                         | 39 | New   |
| Cacolide H               | Sesterterpene | NA                                                                          | <i>Cacospongia sp.</i> | Australia                         | 39 | New   |
| Cacolide I               | Sesterterpene | NA                                                                          | <i>Cacospongia sp.</i> | Australia                         | 39 | New   |
| Cacolide J               | Sesterterpene | NA                                                                          | <i>Cacospongia sp.</i> | Australia                         | 39 | New   |
| Cacolide K               | Sesterterpene | NA                                                                          | <i>Cacospongia sp.</i> | Australia                         | 39 | New   |
| Cacolide L               | Sesterterpene | NA                                                                          | <i>Cacospongia sp.</i> | Australia                         | 39 | New   |
| Cacolic acid A           | Sesterterpene | NA                                                                          | <i>Cacospongia sp.</i> | Australia                         | 39 | New   |
| Cacolic acid B           | Sesterterpene | NA                                                                          | <i>Cacospongia sp.</i> | Australia                         | 39 | New   |
| Cacolic acid C           | Sesterterpene | NA                                                                          | <i>Cacospongia sp.</i> | Australia                         | 39 | New   |
| (+)-Cavernosine          | Norditerpene  | NA                                                                          | <i>Cacospongia sp.</i> | Yong Xing Island                  | 40 | Known |
| (-)-Cavernosine          | Norditerpene  | NA                                                                          | <i>Cacospongia sp.</i> | Yong Xing Island                  | 40 | Known |
| (+)-8,13-Secocavernosine | Norditerpene  | NA                                                                          | <i>Cacospongia sp.</i> | Yong Xing Island                  | 40 | Known |
| (-)-8,13-Secocavernosine | Norditerpene  | NA                                                                          | <i>Cacospongia sp.</i> | Yong Xing Island                  | 40 | Known |

|                                  |                        |                    |                                  |                       |    |       |
|----------------------------------|------------------------|--------------------|----------------------------------|-----------------------|----|-------|
| (+)-8,13-Secoepicavernosine      | Norditerpene           | NA                 | <i>Cacospongia sp.</i>           | Yong Xing Island      | 40 | New   |
| (-)-8,13-Secoepicavernosine      | Norditerpene           | NA                 | <i>Cacospongia sp.</i>           | Yong Xing Island      | 40 | New   |
| (+)-Hippolide E                  | Sesterterpene          | NA                 | <i>Cacospongia sp.</i>           | Yong Xing Island      | 40 | New   |
| (-)-Hippolide E                  | Sesterterpene          | NA                 | <i>Cacospongia sp.</i>           | Yong Xing Island      | 40 | New   |
| (+)-(6E)-neomanoalide            | Sesterterpene          | NA                 | <i>Cacospongia sp.</i>           | Yong Xing Island      | 40 | New   |
| (-)-(6E)-neomanoalide            | Sesterterpene          | NA                 | <i>Cacospongia sp.</i>           | Yong Xing Island      | 40 | New   |
| (3R,4R)-14,18-Secoluffariolide C | Sesterterpene          | NA                 | <i>Cacospongia sp.</i>           | Yong Xing Island      | 40 | New   |
| Cacospongine A                   | C21 pyridine terpenoid | NA                 | <i>Cacospongia sp.</i>           | Yong Xing Island      | 40 | New   |
| Luffariolide C                   | Sesterterpene          | NA                 | <i>Cacospongia sp.</i>           | Yong Xing Island      | 40 | known |
| (Z)-neomanoalide                 | Sesterterpene          | NA                 | <i>Cacospongia sp.</i>           | Yong Xing Island      | 40 | known |
| Hippolide J                      | Sesterterpene          | NA                 | <i>Cacospongia sp.</i>           | Yong Xing Island      | 40 | known |
| (-)-Zampanolide                  | Macrolide              | Cytotoxic activity | <i>Cacospongia mycofijiensis</i> | Cathedral Cave, Tonga | 41 | Known |
| Zampanolide B                    | Macrolide              | Cytotoxic activity | <i>Cacospongia mycofijiensis</i> | Cathedral Cave, Tonga | 41 | New   |
| Zampanolide C                    | Macrolide              | Cytotoxic activity | <i>Cacospongia mycofijiensis</i> | Cathedral Cave, Tonga | 41 | New   |
| Zampanolide D                    | Macrolide              | Cytotoxic activity | <i>Cacospongia mycofijiensis</i> | Cathedral Cave, Tonga | 41 | New   |
| Zampanolides E                   | Macrolide              | Cytotoxic activity | <i>Cacospongia mycofijiensis</i> | Cathedral Cave, Tonga | 41 | New   |
| (-)-Dactylolide                  | Macrolide              | Cytotoxic activity | <i>Cacospongia mycofijiensis</i> | Cathedral Cave, Tonga | 41 | Known |

|                                                                         |                      |                                            |                                  |                                                   |    |       |
|-------------------------------------------------------------------------|----------------------|--------------------------------------------|----------------------------------|---------------------------------------------------|----|-------|
| Thiopyrone CTP-431                                                      | Nitrogenous compound | NA                                         | <i>Cacospongia mycofijiensis</i> | Fiji islands                                      | 42 | New   |
| Phyllospongin A                                                         | Sesterterpene        | Cytotoxic activity &Antibacterial activity | <i>Phyllospongia lamellosa</i>   | Shaab Saad area, Hurghada along the Red Sea Coast | 43 | New   |
| Phyllospongin B                                                         | Sesterterpene        | Cytotoxic activity &Antibacterial activity | <i>Phyllospongia lamellosa</i>   | Shaab Saad area, Hurghada along the Red Sea Coast | 43 | New   |
| Phyllospongin C                                                         | Sesterterpene        | Cytotoxic activity &Antibacterial activity | <i>Phyllospongia lamellosa</i>   | Shaab Saad area, Hurghada along the Red Sea Coast | 43 | New   |
| Phyllospongin D                                                         | Sesterterpene        | Cytotoxic activity &Antibacterial activity | <i>Phyllospongia lamellosa</i>   | Shaab Saad area, Hurghada along the Red Sea Coast | 43 | New   |
| Phyllospongin E                                                         | Sesterterpene        | Cytotoxic activity &Antibacterial activity | <i>Phyllospongia lamellosa</i>   | Shaab Saad area, Hurghada along the Red Sea Coast | 43 | New   |
| 12a-Acetoxy-20,24-dimethyl-25-norscalar-16-en-24-one                    | Sesterterpene        | Cytotoxic activity &Antibacterial activity | <i>Phyllospongia lamellosa</i>   | Shaab Saad area, Hurghada along the Red Sea Coast | 43 | Known |
| 12a-Acetoxy-13b,18b-cyclobutan-20,24-dimethyl-24-oxoscalar-16-en-25b-ol | Sesterterpene        | Cytotoxic activity &Antibacterial activity | <i>Phyllospongia lamellosa</i>   | Shaab Saad area, Hurghada along the Red Sea Coast | 43 | Known |
| 12a-Acetoxy-24,25-epoxy-24-hydroxy-20,24-dimethylsclarane               | Sesterterpene        | Cytotoxic activity &Antibacterial activity | <i>Phyllospongia lamellosa</i>   | Shaab Saad area, Hurghada along the Red Sea Coast | 43 | Known |

|                                                                           |                      |                                            |                                                                             |                                                                        |    |       |
|---------------------------------------------------------------------------|----------------------|--------------------------------------------|-----------------------------------------------------------------------------|------------------------------------------------------------------------|----|-------|
| Scalardysin-A                                                             | Sesterterpene        | Cytotoxic activity &Antibacterial activity | <i>Phyllospongia lamellosa</i>                                              | Shaab Saad area, Hurghada along the Red Sea Coast                      | 43 | Known |
| 2-(3',5'-Dibromo-2'-methoxyphenoxy)-3,5-dibromophenol                     | Halogenated compound | Antibacterial activity                     | <i>Phyllospongia papyracea</i>                                              | The natural products repository of the National Cancer Institute (NCI) | 44 | Known |
| Phyllactone A                                                             | Sesterterpene        | Cytotoxic activity                         | <i>Phyllospongia papyracea</i>                                              | Sangihe Island, Indonesia                                              | 45 | Known |
| Phyllactone B                                                             | Sesterterpene        | Cytotoxic activity                         | <i>Phyllospongia papyracea</i>                                              | Sangihe Island, Indonesia                                              | 45 | Known |
| Phyllactone D                                                             | Sesterterpene        | Cytotoxic activity                         | <i>Phyllospongia papyracea</i>                                              | Sangihe Island, Indonesia                                              | 45 | Known |
| Phyllactone E                                                             | Sesterterpene        | Cytotoxic activity                         | <i>Phyllospongia papyracea</i>                                              | Sangihe Island, Indonesia                                              | 45 | Known |
| Phyllactone F                                                             | Sesterterpene        | Cytotoxic activity                         | <i>Phyllospongia papyracea</i>                                              | Sangihe Island, Indonesia                                              | 45 | Known |
| Phyllactone G                                                             | Sesterterpene        | Cytotoxic activity                         | <i>Phyllospongia papyracea</i>                                              | Sangihe Island, Indonesia                                              | 45 | Known |
| 12 $\alpha$ , 24-Dihydroxy-20, 24-dimethyl-15, 17-scalaradien-25,24-olide | Sesterterpene        | Cytotoxic activity                         | <i>Phyllospongia papyracea</i>                                              | Sangihe Island, Indonesia                                              | 45 | Known |
| Phyllactone H                                                             | Sesterterpene        | Cytotoxic activity                         | <i>Phyllospongia papyracea</i>                                              | Sangihe Island, Indonesia                                              | 45 | New   |
| 12 $\alpha$ -Acetoxy-22-hydroxy-24-methyl-24-oxoscalar-16-en-25-al        | Sesterterpene        | Antiproliferative activity                 | <i>Carteriospongia sp.</i>                                                  | The coast of Nosy Be, Madagascar                                       | 46 | Known |
| 16 $\beta$ ,22-Dihydroxy-24-methyl-24-oxoscalaran-25,12 $\beta$ -olactone | Sesterterpene        | NA                                         | <i>Carteriospongia sp.</i>                                                  | The coast of Nosy Be, Madagascar                                       | 46 | Known |
| 12 $\alpha$ ,22-Dihydroxy-24-methyl-24-oxoscalar-16-en-25 $\alpha$ -al    | Sesterterpene        | Antiproliferative activity                 | <i>Closely similar species to Carteriospongia sp.designated NB-04-06-17</i> | The coast of Nosy Be, Madagascar                                       | 46 | New   |
| 12 $\beta$ ,22-Dihydroxy-24-methyl-24-oxoscalar-16-en-25 $\beta$ -al      | Sesterterpene        | Antiproliferative activity                 | <i>Closely similar species to Carteriospongia sp.designated NB-04-06-17</i> | The coast of Nosy Be, Madagascar                                       | 46 | New   |

|                                                                                    |               |                                    |                                                                             |                                         |    |     |
|------------------------------------------------------------------------------------|---------------|------------------------------------|-----------------------------------------------------------------------------|-----------------------------------------|----|-----|
| 12 $\beta$ ,22-Dihydroxy-24-oxo-24-homoscalar-16,25(26)-diene                      | Sesterterpene | Antiproliferative activity         | <i>Closely similar species to Carteriospongia sp.designated NB-04-06-17</i> | The coast of Nosy Be, Madagascar        | 46 | New |
| 12 $\beta$ ,22,24 $\epsilon$ -Trihydroxy-24-methylscalar-17-ene-18,24-carbolactone | Sesterterpene | Antiproliferative activity         | <i>Closely similar species to Carteriospongia sp.designated NB-04-06-17</i> | The coast of Nosy Be, Madagascar        | 46 | New |
| Carteriofenone A                                                                   | Sesterterpene | Cytotoxic activity (Insignificant) | <i>Carteriospongia foliascens</i>                                           | Dongluoxigu Island, the South China Sea | 47 | New |
| Carteriofenone B                                                                   | Sesterterpene | Cytotoxic activity (Insignificant) | <i>Carteriospongia foliascens</i>                                           | Dongluoxigu Island, the South China Sea | 47 | New |
| Carteriofenone C                                                                   | Sesterterpene | Cytotoxic activity (Insignificant) | <i>Carteriospongia foliascens</i>                                           | Dongluoxigu Island, the South China Sea | 47 | New |
| Carteriofenone D                                                                   | Sesterterpene | Cytotoxic activity                 | <i>Carteriospongia foliascens</i>                                           | Dongluoxigu Island, the South China Sea | 47 | New |
| Carteriofenone E                                                                   | Sesterterpene | Cytotoxic activity                 | <i>Carteriospongia foliascens</i>                                           | Dongluoxigu Island, the South China Sea | 47 | New |
| Carteriofenone F                                                                   | Sesterterpene | Cytotoxic activity                 | <i>Carteriospongia foliascens</i>                                           | Dongluoxigu Island, the South China Sea | 47 | New |
| Carteriofenone G                                                                   | Sesterterpene | Cytotoxic activity                 | <i>Carteriospongia foliascens</i>                                           | Dongluoxigu Island, the South China Sea | 47 | New |

|                                                                                         |                |                       |                                   |                                         |    |       |
|-----------------------------------------------------------------------------------------|----------------|-----------------------|-----------------------------------|-----------------------------------------|----|-------|
| Carteriofenone H                                                                        | Sesterterpene  | Cytotoxic activity    | <i>Carteriospongia foliascens</i> | Dongluoxigu Island, the South China Sea | 47 | New   |
| Carteriofenone I                                                                        | Sesterterpene  | Cytotoxic activity    | <i>Carteriospongia foliascens</i> | Dongluoxigu Island, the South China Sea | 47 | New   |
| Carteriofenone J                                                                        | Sesterterpene  | Cytotoxic activity    | <i>Carteriospongia foliascens</i> | Dongluoxigu Island, the South China Sea | 47 | New   |
| Carteriofenone K                                                                        | Sesterterpene  | Cytotoxic activity    | <i>Carteriospongia foliascens</i> | Dongluoxigu Island, the South China Sea | 47 | New   |
| Phyllofenone B                                                                          | Sesterterpene  | Cytotoxic activity    | <i>Carteriospongia foliascens</i> | Dongluoxigu Island, the South China Sea | 47 | known |
| Phyllofenone E                                                                          | Sesterterpene  | Cytotoxic activity    | <i>Carteriospongia foliascens</i> | Dongluoxigu Island, the South China Sea | 47 | known |
| 12 $\beta$ -(3' $\beta$ -Hydroxybutanoyloxy)-20,24-dimethyl-24-oxo-scalara-16-en-25-al  | Sesterterpene, | Antileukemic activity | <i>Carteriospongia sp.</i>        | The coast of Tai-tung, Taiwan           | 48 | New   |
| 12 $\beta$ -(3' $\beta$ -Hydroxypentanoyloxy)-20,24-dimethyl-24-oxo-scalara-16-en-25-al | Sesterterpene, | Antileukemic activity | <i>Carteriospongia sp.</i>        | The coast of Tai-tung, Taiwan           | 48 | New   |
| 2-Tetraprenil-1,4-benzochinone                                                          | Meroditerpene  | Antileukemic activity | <i>Carteriospongia sp.</i>        | The coast of Tai-tung, Taiwan           | 48 | Known |



|                   |               |                                |                           |                                       |    |       |
|-------------------|---------------|--------------------------------|---------------------------|---------------------------------------|----|-------|
| Puupehenol        | Meroterpene   | Antioxidant -<br>Antimicrobial | <i>Dactylosporgia sp.</i> | Hawaiian island<br>of Maui            | 49 | New   |
| Puupehenone       | Meroterpene   | Antioxidant -<br>Antimicrobial | <i>Dactylosporgia sp.</i> | Hawaiian island<br>of Maui            | 49 | Known |
| Dactylospongin A  | Sesquiterpene | Anti-inflammatory<br>activity  | <i>Dactylosporgia sp</i>  | Xisha Island of<br>South China<br>Sea | 50 | New   |
| Dactylospongin B  | Sesquiterpene | Anti-inflammatory<br>activity  | <i>Dactylosporgia sp</i>  | Xisha Island of<br>South China<br>Sea | 50 | New   |
| Dactylospongin C  | Sesquiterpene | NA                             | <i>Dactylosporgia sp</i>  | Xisha Island of<br>South China<br>Sea | 50 | New   |
| Dactylospongin D  | Sesquiterpene | Anti-inflammatory<br>activity  | <i>Dactylosporgia sp</i>  | Xisha Island of<br>South China<br>Sea | 50 | New   |
| ent-Melemeleone B | Sesquiterpene | Anti-inflammatory<br>activity  | <i>Dactylosporgia sp</i>  | Xisha Island of<br>South China<br>Sea | 50 | known |
| Melemeleone C     | Sesquiterpene | NA                             | <i>Dactylosporgia sp</i>  | Xisha Island of<br>South China<br>Sea | 50 | New   |

|                      |               |                                                 |                               |                                              |    |       |
|----------------------|---------------|-------------------------------------------------|-------------------------------|----------------------------------------------|----|-------|
| Melemeleone D        | Sesquiterpene | NA                                              | <i>Dactylosporgia sp</i>      | Xisha Island of South China Sea              | 50 | New   |
| Melemeleone E        | Sesquiterpene | NA                                              | <i>Dactylosporgia sp</i>      | Xisha Island of South China Sea              | 50 | New   |
| Dysidaminone N       | Sesquiterpene | Anti-inflammatory activity                      | <i>Dactylosporgia sp</i>      | Xisha Island of South China Sea              | 50 | New   |
| 19-O-Methylpelorol   | Sesquiterpene | Cytotoxic activity - Anti-inflammatory activity | <i>Dactylosporgia sp</i>      | Xisha Island of South China Sea              | 50 | New   |
| Pelorol              | Sesquiterpene | NA                                              | <i>Dactylosporgia sp</i>      | Xisha Island of South China Sea              | 50 | known |
|                      |               |                                                 | <i>Dactylosporgia elegans</i> | The island of Ambon, Indonesia               | 51 |       |
|                      |               | Antimalarial activity                           | <i>Hyrrios erectus</i>        | Chuuk Island, Federated States of Micronesia | 19 |       |
| 17-O-Acetylavarol    | Sesquiterpene | NA                                              | <i>Dactylosporgia sp</i>      | Xisha Island of South China Sea              | 50 | known |
| 20-O-Acetylavarol    | Sesquiterpene | NA                                              | <i>Dactylosporgia sp</i>      | Xisha Island of South China Sea              | 50 | known |
| 20-O-Acetylneoavarol | Sesquiterpene | NA                                              | <i>Dactylosporgia sp</i>      | Xisha Island of South China Sea              | 50 | known |

|                                       |               |                                                             |                                       |                             |    |       |
|---------------------------------------|---------------|-------------------------------------------------------------|---------------------------------------|-----------------------------|----|-------|
| 5- <i>epi</i> -nakijiquinone S        | Sesquiterpene | Cytotoxic activity<br>protein kinase<br>inhibitory activity | <i>Dactylosporgia<br/>metachromia</i> | Ambon islands,<br>Indonesia | 52 | New   |
| 5- <i>epi</i> -nakijiquinone Q        | Sesquiterpene | Cytotoxic activity<br>protein kinase<br>inhibitory activity | <i>Dactylosporgia<br/>metachromia</i> | Ambon islands,<br>Indonesia | 52 | New   |
|                                       |               | Antimicrobial activity                                      | <i>Dactylosporgia<br/>elegans</i>     | Ambon islands,<br>Indonesia | 51 |       |
| 5- <i>epi</i> -nakijiquinone T        | Sesquiterpene | Cytotoxic activity<br>protein kinase<br>inhibitory activity | <i>Dactylosporgia<br/>metachromia</i> | Ambon islands,<br>Indonesia | 52 | New   |
| 5- <i>epi</i> -nakijiquinone U        | Sesquiterpene | Cytotoxic activity<br>protein kinase<br>inhibitory activity | <i>Dactylosporgia<br/>metachromia</i> | Ambon islands,<br>Indonesia | 52 | New   |
| 5- <i>epi</i> -nakijiquinone N        | Sesquiterpene | Cytotoxic activity<br>protein kinase<br>inhibitory activity | <i>Dactylosporgia<br/>metachromia</i> | Ambon islands,<br>Indonesia | 52 | New   |
| 5- <i>epi</i> -nakijinol C            | Sesquiterpene | Protein kinase<br>inhibitory activity                       | <i>Dactylosporgia<br/>metachromia</i> | Ambon islands,<br>Indonesia | 52 | New   |
| 5- <i>epi</i> -nakijinol D            | Sesquiterpene | Protein kinase<br>inhibitory activity                       | <i>Dactylosporgia<br/>metachromia</i> | Ambon islands,<br>Indonesia | 52 | New   |
| 18-Hydroxy-5- <i>epi</i> hyrtiophenol | Sesquiterpene | Protein kinase<br>inhibitory activity                       | <i>Dactylosporgia<br/>metachromia</i> | Ambon islands,<br>Indonesia | 52 | Known |

|                                 |                        |                                                                                                                                                                                              |                                   |                                                     |    |       |
|---------------------------------|------------------------|----------------------------------------------------------------------------------------------------------------------------------------------------------------------------------------------|-----------------------------------|-----------------------------------------------------|----|-------|
| 1-O-13-Methyltetradecylglycerol | Miscellaneous compound | NA                                                                                                                                                                                           | <i>Dactylosporgia metachromia</i> | Ambon islands, Indonesia                            | 52 | Known |
| Ilimaquinone                    | Sesquiterpene          | Inhibits protein transport between successive Golgi cisternae by inducing the vesiculation of Golgi membranes - Antitumor (antiproliferative) at high concentration - antimicrobial activity | <i>Dactylosporgia elegans</i>     | The coast of Malaysia & Palau                       | 53 | Known |
|                                 |                        |                                                                                                                                                                                              | <i>Dactylosporgia elegans</i>     | Sangihe Islands, North Sulawesi Province, Indonesia | 54 |       |
|                                 |                        | Anti-inflammatory activity                                                                                                                                                                   | <i>Smenospongia cerebriformis</i> | Vinhmoc, Quangtri                                   | 32 |       |
|                                 |                        | Antimalarial activity                                                                                                                                                                        | <i>Hyrtios erectus</i>            | Chuuk Island, Federated States of Micronesia        | 19 |       |
| 5,8- Diepi-ilimaquinone         | Sesquiterpene          | HIF-1 activator - Antitumor                                                                                                                                                                  | <i>Dactylosporgia elegans</i>     | The coast of Malaysia & Palau                       | 53 | New   |
| 4,5-Diepi-dactylosporgiaquinone | Sesquiterpene          | HIF-1 activator - Antitumor                                                                                                                                                                  | <i>Dactylosporgia elegans</i>     | The coast of Malaysia & Palau                       | 53 | New   |

|                                                        |               |                        |                               |                               |    |       |
|--------------------------------------------------------|---------------|------------------------|-------------------------------|-------------------------------|----|-------|
| 8- <i>epi</i> -Dactyloquinone B                        | Sesquiterpene | Antitumor              | <i>Dactylosporgia elegans</i> | The coast of Malaysia & Palau | 53 | New   |
| 10,17- <i>O</i> -Cyclo-4,5-diepi-dactylosporgiaquinone | Sesquiterpene | Antitumor              | <i>Dactylosporgia elegans</i> | The coast of Malaysia & Palau | 53 | New   |
| Cyclosporgiacatechol                                   | Sesquiterpene | Antitumor              | <i>Dactylosporgia elegans</i> | The coast of Malaysia & Palau | 53 | New   |
| 8- <i>epi</i> -ent-chromazonarol                       | Sesquiterpene | NA                     | <i>Dactylosporgia elegans</i> | The coast of Malaysia & Palau | 53 | Known |
| Cyclosporgiaquinone-1                                  | Sesquiterpene | Antitumor              | <i>Dactylosporgia elegans</i> | The coast of Malaysia & Palau | 53 | Known |
| Cyclosporgiaquinone-2                                  | Sesquiterpene | Antitumor              | <i>Dactylosporgia elegans</i> | The coast of Malaysia & Palau | 53 | Known |
| 19 <i>R</i> -Dactyltronic acid                         | Sesquiterpene | Antibacterial activity | <i>Dactylosporgia elegans</i> | Sanya, China                  | 55 | Known |
| 19 <i>S</i> -Dactyltronic acid                         | Sesquiterpene | Antibacterial activity | <i>Dactylosporgia elegans</i> | Sanya, China                  | 55 | Known |

|                                                                                                                                        |                     |                                |                                       |                                                              |    |       |
|----------------------------------------------------------------------------------------------------------------------------------------|---------------------|--------------------------------|---------------------------------------|--------------------------------------------------------------|----|-------|
| Dictyoceratin C                                                                                                                        | Sesquiterpene       | Antibacterial activity         | <i>Dactylosporgia elegans</i>         | Sanya, China                                                 | 55 | Known |
|                                                                                                                                        |                     |                                | <i>Dactylosporgia elegans</i>         | Sangihe Islands,<br>North Sulawesi<br>Province,<br>Indonesia | 54 |       |
|                                                                                                                                        |                     | Anti-inflammatory<br>activity  | <i>Smenospongia<br/>cerebriformis</i> | Vinhmoc,<br>Quangtri                                         | 32 |       |
| Polyfibrospongol A                                                                                                                     | Sesquiterpene       | Antibacterial activity         | <i>Dactylosporgia elegans</i>         | Sanya, China                                                 | 55 | Known |
|                                                                                                                                        |                     | Anti-inflammatory<br>activity  | <i>Smenospongia<br/>cerebriformis</i> | Vinhmoc,<br>Quangtri                                         | 32 |       |
| 3 -Hydroxycholesta-5,8-dien-7-one                                                                                                      | Sterol              | Antibacterial activity         | <i>Dactylosporgia elegans</i>         | Sanya, China                                                 | 55 | Known |
| Pregna-1,20-dien-3-one                                                                                                                 | Sterol              | Antibacterial activity         | <i>Dactylosporgia elegans</i>         | Sanya, China                                                 | 55 | Known |
| Eleganstone A                                                                                                                          | Diterpene           | Weak antibacterial<br>activity | <i>Dactylosporgia elegans</i>         | Yongxing<br>Island, China                                    | 56 | New   |
| (1 <i>R</i> *,2 <i>E</i> ,4 <i>R</i> *,7 <i>E</i> ,10 <i>S</i> *,11 <i>S</i> *,12 <i>R</i> *)-10,18-Diacetoxydolabella-2,7-dien-6-one  | Terpene             | Weak antibacterial<br>activity | <i>Dactylosporgia elegans</i>         | Yongxing<br>Island, China                                    | 56 | known |
| (1 <i>R</i> *,2 <i>E</i> ,4 <i>R</i> *,8 <i>E</i> ,10 <i>S</i> *,11 <i>S</i> *,12 <i>R</i> *)-10,18-diacetoxydolabella-2,8- dien-6-one | Diterpene           | Weak antibacterial<br>activity | <i>Dactylosporgia elegans</i>         | Yongxing<br>Island, China                                    | 56 | New   |
| (1 <i>R</i> *,2 <i>E</i> ,4 <i>R</i> *,7 <i>Z</i> ,10 <i>S</i> *,11 <i>S</i> *,12 <i>R</i> *)-10,18-Diacetoxydolabella-2,7-dien-6-one  | Diterpene           | Weak antibacterial<br>activity | <i>Dactylosporgia elegans</i>         | Yongxing<br>Island, China                                    | 56 | known |
| Dactylospongenone G                                                                                                                    | Drimane meroterpene | NA                             | <i>Dactylosporgia elegans</i>         | The island of<br>Ambon,<br>Indonesia                         | 51 | New   |
| Dactylospongenone H                                                                                                                    | Drimane meroterpene | NA                             | <i>Dactylosporgia elegans</i>         | The island of<br>Ambon,<br>Indonesia                         | 51 | New   |
| 5- <i>epi</i> -ilimaquinone                                                                                                            | Sesquiterpene       | Cytotoxic activity             | <i>Dactylosporgia elegans</i>         | The island of<br>Ambon,<br>Indonesia                         | 51 | known |
| 5- <i>epi</i> -smenospongine                                                                                                           | Sesquiterpene       | NA                             | <i>Dactylosporgia elegans</i>         | The island of<br>Ambon,<br>Indonesia                         | 51 | known |
| 5- <i>epi</i> -smenospongidine                                                                                                         | Sesquiterpene       | Cytotoxic activity             | <i>Dactylosporgia elegans</i>         | The island of<br>Ambon,<br>Indonesia                         | 51 | known |

|                                                                                                                                                             |               |                                             |                               |                                |    |       |
|-------------------------------------------------------------------------------------------------------------------------------------------------------------|---------------|---------------------------------------------|-------------------------------|--------------------------------|----|-------|
| Nakijiquinone D                                                                                                                                             | Sesquiterpene | NA                                          | <i>Dactylosporgia elegans</i> | The island of Ambon, Indonesia | 51 | known |
| Smenospongine C                                                                                                                                             | Sesquiterpene | NA                                          | <i>Dactylosporgia elegans</i> | The island of Ambon, Indonesia | 51 | known |
| Isospongiaquinone                                                                                                                                           | Sesquiterpene | Cytotoxic activity                          | <i>Dactylosporgia elegans</i> | The island of Ambon, Indonesia | 51 | known |
| Isosmenospongine                                                                                                                                            | Sesquiterpene | Cytotoxic activity - Antimicrobial activity | <i>Dactylosporgia elegans</i> | The island of Ambon, Indonesia | 51 | known |
| Nakijiquinone A                                                                                                                                             | Sesquiterpene | Cytotoxic activity                          | <i>Dactylosporgia elegans</i> | The island of Ambon, Indonesia | 51 | known |
| Nakijiquinone B                                                                                                                                             | Sesquiterpene | NA                                          | <i>Dactylosporgia elegans</i> | The island of Ambon, Indonesia | 51 | known |
| Nakijiquinone C                                                                                                                                             | Sesquiterpene | NA                                          | <i>Dactylosporgia elegans</i> | The island of Ambon, Indonesia | 51 | known |
| Nakijiquinone A                                                                                                                                             | Sesquiterpene | Cytotoxic activity                          | <i>Dactylosporgia elegans</i> | The island of Ambon, Indonesia | 51 | known |
| (3 <i>S</i> ,5 <i>R</i> ,9 <i>R</i> ,10 <i>S</i> ,13 <i>R</i> ,17 <i>R</i> ,20 <i>R</i> ,24 <i>S</i> ,22 <i>E</i> )-ergosta-6,8,22-triene-3,25-diol         | Sterol        | Cytotoxic activity                          | <i>Dactylosporgia elegans</i> | Xisha islands, China           | 57 | New   |
| (3 <i>S</i> ,5 <i>R</i> ,9 <i>R</i> ,10 <i>S</i> ,13 <i>R</i> ,17 <i>R</i> ,20 <i>R</i> ,24 <i>S</i> ,22 <i>E</i> )-ergosta-6,8,22-triene-25-ol-3-sulfonate | Sterol        | Cytotoxic activity                          | <i>Dactylosporgia elegans</i> | Xisha islands, China           | 57 | New   |
| 5 $\alpha$ ,8 $\alpha$ -epidioxy-cholest-6-en-3 $\beta$ -ol                                                                                                 | Sterol        | NA                                          | <i>Dactylosporgia elegans</i> | Xisha islands, China           | 57 | known |
| Popolohuanone G                                                                                                                                             | Sesquiterpene | Anti-inflammatory activity                  | <i>Dactylosporgia elegans</i> | Xisha islands, China           | 58 | New   |
| Popolohuanone H                                                                                                                                             | Sesquiterpene | Anti-inflammatory activity                  | <i>Dactylosporgia elegans</i> | Xisha islands, China           | 58 | New   |

|                                                |                      |                                                                                              |                                    |                                                     |    |       |
|------------------------------------------------|----------------------|----------------------------------------------------------------------------------------------|------------------------------------|-----------------------------------------------------|----|-------|
| Popolohuanone I                                | Sesquiterpene        | Anti-inflammatory activity                                                                   | <i>Dactylosporgia elegans</i>      | Xisha islands, China                                | 58 | New   |
| Popolohuanone B                                | Sesquiterpene        | Anti-inflammatory activity                                                                   | <i>Dactylosporgia elegans</i>      | Xisha islands, China                                | 58 | known |
| Popolohuanone C                                | Sesquiterpene        | Anti-inflammatory activity                                                                   | <i>Dactylosporgia elegans</i>      | Xisha islands, China                                | 58 | known |
| Nakijiquinone V                                | Merosesquiterpene    | NA                                                                                           | <i>Dactylosporgia elegans</i>      | Sangihe Islands, North Sulawesi Province, Indonesia | 54 | New   |
| Smenospongine                                  | Merosesquiterpene    | Antimicrobial activity                                                                       | <i>Dactylosporgia elegans</i>      | Sangihe Islands, North Sulawesi Province, Indonesia | 54 | Known |
| 20-demethoxy-20-isopentylaminodactyloquinone D | Sesquiterpene        | NA                                                                                           | <i>Dactylosporgia elegans</i>      | Not detected                                        | 59 | New   |
| 20-demethoxy-20-isobutylaminodactyloquinone D  | Sesquiterpene        | NA                                                                                           | <i>Dactylosporgia elegans</i>      | Not detected                                        | 59 | New   |
| 19-methoxy-dictyoceratin-A                     | Sesquiterpene        | Cytotoxic activity                                                                           | <i>Dactylosporgia elegans</i>      | Not detected                                        | 59 | New   |
| (+)-Spiroreticulatine                          | Nitrogenous compound | Inhibitory activity on Interleukin-2 production but inactive against normal tumor cell lines | <i>Fascaplysinopsis reticulata</i> | The South China Sea                                 | 60 | New   |



|                                                           |                               |                                                                                              |                                    |                      |    |       |
|-----------------------------------------------------------|-------------------------------|----------------------------------------------------------------------------------------------|------------------------------------|----------------------|----|-------|
| (-)-Spiroreticulatine                                     | Nitrogenous compound          | Inhibitory activity on Interleukin-2 production but inactive against normal tumor cell lines | <i>Fascaplysinopsis reticulata</i> | The South China Sea  | 60 | New   |
| Clavirolide H                                             | Diterpene                     | Cytotoxic activity (Not significant)                                                         | <i>Fascaplysinopsis reticulata</i> | Xisha islands, China | 61 | New   |
| Clavirolide D                                             | Diterpene                     | NA                                                                                           | <i>Fascaplysinopsis reticulata</i> | Xisha islands, China | 61 | Known |
| Clavulactone                                              | Diterpene                     | NA                                                                                           | <i>Fascaplysinopsis reticulata</i> | Xisha islands, China | 61 | Known |
| Cavernosine                                               | C17 $\gamma$ -lactone terpene | Cytotoxic activity                                                                           | <i>Fascaplysinopsis reticulata</i> | Xisha islands, China | 61 | Known |
| Dihydrodysamide C                                         | Nitrogenous compound          | Cytotoxic activity                                                                           | <i>Fascaplysinopsis reticulata</i> | Xisha islands, China | 61 | Known |
| (22E)-cholesta-4,6,8(14),22-tetraen-3-one                 | Sterol                        | Cytotoxic activity                                                                           | <i>Fascaplysinopsis reticulata</i> | Xisha islands, China | 61 | Known |
| Cholesta-4,6,8(14)-trien-3-one                            | Sterol                        | NA                                                                                           | <i>Fascaplysinopsis reticulata</i> | Xisha islands, China | 61 | Known |
| (22E)-ergosta-4,6,8(14),22-tetraen-3-one                  | Sterol                        | NA                                                                                           | <i>Fascaplysinopsis reticulata</i> | Xisha islands, China | 61 | Known |
| (24E)-stigmasta-4,6,8(14),24(28)-tetraen-3-one            | Sterol                        | Cytotoxic activity (Not significant)                                                         | <i>Fascaplysinopsis reticulata</i> | Xisha islands, China | 61 | Known |
| (24S)-ergosta-4,6,8(14)-trien-3-one                       | Sterol                        | Cytotoxic activity                                                                           | <i>Fascaplysinopsis reticulata</i> | Xisha islands, China | 61 | Known |
| (22E)-stigmasta-4,6,8(14),22-tetraen-3-one                | Sterol                        | Cytotoxic activity                                                                           | <i>Fascaplysinopsis reticulata</i> | Xisha islands, China | 61 | Known |
| C(24)-epimeric mixture of stigmasta-4,6,8(14)-trien-3-one | Sterol                        | Cytotoxic activity                                                                           | <i>Fascaplysinopsis reticulata</i> | Xisha islands, China | 61 | Known |
| 6,60-bis-(debromo)-gelliusine F                           | Nitrogenous compound          | Antimicrobial activity                                                                       | <i>Fascaplysinopsis reticulata</i> | Mayotte              | 62 | New   |
| 6-Bromo-8,1'-dihydro-isoplysin A                          | Nitrogenous compound          | Antimicrobial activity                                                                       | <i>Fascaplysinopsis reticulata</i> | Mayotte              | 62 | New   |

|                                                 |                      |                                                                          |                                    |                                 |    |       |
|-------------------------------------------------|----------------------|--------------------------------------------------------------------------|------------------------------------|---------------------------------|----|-------|
| 5,6-Dibromo-8,1'-dihydro-isoplysin A            | Nitrogenous compound | Antimicrobial activity                                                   | <i>Fascaplysinopsis reticulata</i> | Mayotte                         | 62 | New   |
| 8-Oxo-tryptamine                                | Nitrogenous compound | Moderate antimalarial activity                                           | <i>Fascaplysinopsis reticulata</i> | Mayotte                         | 62 | Known |
| Tryptamine                                      | Nitrogenous compound | Antimicrobial activity                                                   | <i>Fascaplysinopsis reticulata</i> | Mayotte                         | 62 | Known |
| (E)-6-Bromo-20-demethyl-30-N-methylaplysinopsin | Nitrogenous compound | Moderate antimalarial activity                                           | <i>Fascaplysinopsis reticulata</i> | Mayotte                         | 62 | Known |
| (Z)-6-Bromo-20-demethyl-30-N-methylaplysinopsin | Nitrogenous compound | Moderate antimalarial activity                                           | <i>Fascaplysinopsis reticulata</i> | Mayotte                         | 62 | Known |
| (+)& (-)Oxoaplysinopsin A                       | Nitrogenous compound | Cytotoxic activity & tyrosine phosphatase 1B (PTP1B) inhibition activity | <i>Fascaplysinopsis reticulata</i> | Xisha Island of South China Sea | 63 | New   |
| (+)& (-)Oxoaplysinopsin B                       | Nitrogenous compound | Cytotoxic activity & tyrosine phosphatase 1B (PTP1B) inhibition activity | <i>Fascaplysinopsis reticulata</i> | Xisha Island of South China Sea | 63 | New   |
| (+)& (-)Oxoaplysinopsin C                       | Nitrogenous compound | Cytotoxic activity & tyrosine phosphatase 1B (PTP1B) inhibition activity | <i>Fascaplysinopsis reticulata</i> | Xisha Island of South China Sea | 63 | New   |
| (+)& (-)Oxoaplysinopsin D                       | Nitrogenous compound | Cytotoxic activity & tyrosine phosphatase 1B (PTP1B) inhibition activity | <i>Fascaplysinopsis reticulata</i> | Xisha Island of South China Sea | 63 | New   |

|                                   |                      |                                                                          |                                    |                                 |    |       |
|-----------------------------------|----------------------|--------------------------------------------------------------------------|------------------------------------|---------------------------------|----|-------|
| (+)& (-)Oxoaplysinopsin E         | Nitrogenous compound | Cytotoxic activity & tyrosine phosphatase 1B (PTP1B) inhibition activity | <i>Fascaplysinopsis reticulata</i> | Xisha Island of South China Sea | 63 | New   |
| (+)& (-)Oxoaplysinopsin F         | Nitrogenous compound | Cytotoxic activity & tyrosine phosphatase 1B (PTP1B) inhibition activity | <i>Fascaplysinopsis reticulata</i> | Xisha Island of South China Sea | 63 | New   |
| (+)& (-)Oxoaplysinopsin G         | Nitrogenous compound | Cytotoxic activity & tyrosine phosphatase 1B (PTP1B) inhibition activity | <i>Fascaplysinopsis reticulata</i> | Xisha Island of South China Sea | 63 | New   |
| (Z)-3'-Deimino-3'-oxoaplysinopsin | Nitrogenous compound | Cytotoxic activity & tyrosine phosphatase 1B (PTP1B) inhibition activity | <i>Fascaplysinopsis reticulata</i> | Xisha Island of South China Sea | 63 | Known |
| (E)-3'-Deimino-3'-oxoaplysinopsin | Nitrogenous compound | Cytotoxic activity & tyrosine phosphatase 1B (PTP1B) inhibition activity | <i>Fascaplysinopsis reticulata</i> | Xisha Island of South China Sea | 63 | Known |
| (E)-3-Indolylpropenoate           | Nitrogenous compound | Cytotoxic activity & tyrosine phosphatase 1B (PTP1B) inhibition activity | <i>Fascaplysinopsis reticulata</i> | Xisha Island of South China Sea | 63 | Known |

|                                           |                      |                                                                          |                                    |                                 |    |       |
|-------------------------------------------|----------------------|--------------------------------------------------------------------------|------------------------------------|---------------------------------|----|-------|
| Indolyl-3-acetic acid methyl ester        | Nitrogenous compound | Cytotoxic activity & tyrosine phosphatase 1B (PTP1B) inhibition activity | <i>Fascaplysinopsis reticulata</i> | Xisha Island of South China Sea | 63 | Known |
| 3-Methoxycarbonylindole                   | Nitrogenous compound | Cytotoxic activity & tyrosine phosphatase 1B (PTP1B) inhibition activity | <i>Fascaplysinopsis reticulata</i> | Xisha Island of South China Sea | 63 | Known |
| 3-Formylindole                            | Nitrogenous compound | Cytotoxic activity & tyrosine phosphatase 1B (PTP1B) inhibition activity | <i>Fascaplysinopsis reticulata</i> | Xisha Island of South China Sea | 63 | Known |
|                                           |                      |                                                                          | <i>Hyrtios erectus</i>             | The Red Sea Coast, Jeddah       | 8  |       |
| 3, 5-Dibromoverongiaquinol dimethyl ketal | Nitrogenous compound | Cytotoxic activity & tyrosine phosphatase 1B (PTP1B) inhibition activity | <i>Fascaplysinopsis reticulata</i> | Xisha Island of South China Sea | 63 | Known |
| Purealidin R                              | Nitrogenous compound | Cytotoxic activity & tyrosine phosphatase 1B (PTP1B) inhibition activity | <i>Fascaplysinopsis reticulata</i> | Xisha Island of South China Sea | 63 | Known |
| Aerothionin                               | Nitrogenous compound | Cytotoxic activity & tyrosine phosphatase 1B (PTP1B) inhibition activity | <i>Fascaplysinopsis reticulata</i> | Xisha Island of South China Sea | 63 | Known |
| Homoaerothionin                           | Nitrogenous compound | Cytotoxic activity & tyrosine phosphatase 1B (PTP1B) inhibition activity | <i>Fascaplysinopsis reticulata</i> | Xisha Island of South China Sea | 63 | Known |
| Subreamolline C                           | Nitrogenous compound | Cytotoxic activity & tyrosine phosphatase 1B (PTP1B) inhibition activity | <i>Fascaplysinopsis reticulata</i> | Xisha Island of South China Sea | 63 | New   |
| Subreamolline D                           | Nitrogenous compound | Cytotoxic activity & tyrosine phosphatase 1B (PTP1B) inhibition activity | <i>Fascaplysinopsis reticulata</i> | Xisha Island of South China Sea | 63 | New   |

|                          |               |                    |                        |                                      |    |       |
|--------------------------|---------------|--------------------|------------------------|--------------------------------------|----|-------|
| Luffalide A              | Sesterterpene | NA                 | <i>Luffariella sp.</i> | The western coast of Pingtung county | 64 | New   |
| Luffalide B              | Sesterterpene | NA                 | <i>Luffariella sp.</i> | The western coast of Pingtung county | 64 | New   |
| Luffalide C              | Sesterterpene | NA                 | <i>Luffariella sp.</i> | The western coast of Pingtung county | 64 | New   |
| Luffalide D              | Sesterterpene | NA                 | <i>Luffariella sp.</i> | The western coast of Pingtung county | 64 | New   |
| Luffalide E              | Sesterterpene | Cytotoxic activity | <i>Luffariella sp.</i> | The western coast of Pingtung county | 64 | New   |
| Luffalide F              | Sesterterpene | NA                 | <i>Luffariella sp.</i> | The western coast of Pingtung county | 64 | New   |
| Z-24-Acetoxyneomanoalide | Sesterterpene | NA                 | <i>Luffariella sp.</i> | The western coast of Pingtung county | 64 | Known |

|                                                                                                                                            |                      |                                                                                             |                               |                                      |    |       |
|--------------------------------------------------------------------------------------------------------------------------------------------|----------------------|---------------------------------------------------------------------------------------------|-------------------------------|--------------------------------------|----|-------|
| (Z)- neomanoalide 24,25-diacetate                                                                                                          | Sesterterpene        | Cytotoxic activity                                                                          | <i>Luffariella sp.</i>        | The western coast of Pingtung county | 64 | Known |
| Luffariellin B                                                                                                                             | Sesterterpene        | Cytotoxic activity                                                                          | <i>Luffariella sp.</i>        | The western coast of Pingtung county | 64 | Known |
| 25- Acetoxyluffariellin A                                                                                                                  | Sesterterpene        | Cytotoxic activity                                                                          | <i>Luffariella sp.</i>        | The western coast of Pingtung county | 64 | Known |
| Cacofuran A                                                                                                                                | Diterpene            | NA                                                                                          | <i>Luffariella sp.</i>        | Cape Hedo, Okinawa                   | 65 | Known |
| Cacofuran B                                                                                                                                | Diterpene            | NA                                                                                          | <i>Luffariella sp.</i>        | Cape Hedo, Okinawa                   | 65 | Known |
| (3b <i>R</i> ,7 <i>S</i> ,9a <i>S</i> )-3b,6,6,9a-tetramethyl-3b,4,5,5a,6,7,8,9,9a,9b,10,11-dodecahydrophenanthro[1,2-b]furan-7-ol         | Diterpene            | Cytotoxic activity                                                                          | <i>Luffariella sp.</i>        | Cape Hedo, Okinawa                   | 65 | New   |
| (3b <i>R</i> ,7 <i>S</i> ,9a <i>S</i> )-3b,6,6,9a-tetramethyl-3b,4,5,5a,6,7,8,9,9a,9b,10,11-dodecahydrophenanthro[1,2-b]furan-7-yl acetate | Diterpene            | Cytotoxic activity                                                                          | <i>Luffariella sp.</i>        | Cape Hedo, Okinawa                   | 65 | New   |
| Variabine A                                                                                                                                | Nitrogenous compound | Inhibition of chymotrypsin-like activity of the proteasome and Ubc13 (E2)–Uev1A interaction | <i>Luffariella variabilis</i> | North Sulawesi, Indonesia            | 21 | New   |

|                                                                                                                    |               |                                                                                                    |                               |                                    |    |       |
|--------------------------------------------------------------------------------------------------------------------|---------------|----------------------------------------------------------------------------------------------------|-------------------------------|------------------------------------|----|-------|
| 5-((2E,6E)-7-((Z)-4-(3-(furan-3-yl)propylidene)tetrahydrofuran-2-yl)hepta-2,6-dien-1-yl)furan-3-carboxylic acid    | Sesterterpene | Cytotoxic activity                                                                                 | <i>Luffariella variabilis</i> | Iriomote Island, Okinawa           | 66 | New   |
| 6-(5-(2-(furan-3-yl)ethyl)-6-hydroxy-1,4a,6-trimethyldecahydronaphthalen-1-yl)-3-methyl-5,6-dihydro-2H-pyran-2-one | Sesterterpene | Cytotoxic activity                                                                                 | <i>Luffariella variabilis</i> | Iriomote Island, Okinawa           | 66 | New   |
| <b>B- Family: Dysideidae</b>                                                                                       |               |                                                                                                    |                               |                                    |    |       |
| 5'-Monoacetylavarol                                                                                                | Sesquiterpene | NA                                                                                                 | <i>Dysidea avara</i>          | The Northwest Mediterranean sea    | 67 | Known |
| (+)-Avarone                                                                                                        | Sesquiterpene | Cytotoxic activity - NF-κB inhibiting activity - protein kinase inhibition - Insecticidal activity | <i>Dysidea avara</i>          | Mediterranean Sea (Fethiye,Turkey) | 68 | known |
| (-)-3'-Methylaminoavarone                                                                                          | Sesquiterpene | Cytotoxic activity - NF-κB inhibiting activity - protein kinase inhibition - Insecticidal activity | <i>Dysidea avara</i>          | Mediterranean Sea (Fethiye,Turkey) | 68 | known |
| (-)-4'-Methylaminoavarone                                                                                          | Sesquiterpene | Cytotoxic activity - NF-κB inhibiting activity                                                     | <i>Dysidea avara</i>          | Mediterranean Sea (Fethiye,Turkey) | 68 | known |

|                                    |               |                                                                        |                      |                                    |    |     |
|------------------------------------|---------------|------------------------------------------------------------------------|----------------------|------------------------------------|----|-----|
| (-)-N-Methylmelemeleone-A          | Sesquiterpene | Cytotoxic activity - protein kinase inhibition - Insecticidal activity | <i>Dysidea avara</i> | Mediterranean Sea (Fethiye,Turkey) | 68 | New |
| Dysideanone A                      | Sesquiterpene | NA                                                                     | <i>Dysidea avara</i> | The south China sea                | 69 | New |
| Dysideanone B                      | Sesquiterpene | Cytotoxic activity                                                     | <i>Dysidea avara</i> | The south China sea                | 69 | New |
| Dysideanone C                      | Sesquiterpene | NA                                                                     | <i>Dysidea avara</i> | The south China sea                | 69 | New |
| Dysiquinol A                       | Sesquiterpene | Cytotoxic activity                                                     | <i>Dysidea avara</i> | The south China sea                | 70 | New |
| Dysiquinol B                       | Sesquiterpene | Cytotoxic activity                                                     | <i>Dysidea avara</i> | The south China sea                | 70 | New |
| Dysiquinol C                       | Sesquiterpene | Cytotoxic activity                                                     | <i>Dysidea avara</i> | The south China sea                | 70 | New |
| Dysiquinol D                       | Sesquiterpene | Cytotoxic - NF-kB inhibitory activity                                  | <i>Dysidea avara</i> | The south China sea                | 70 | New |
| (5S,8S,9R,10S)-18-Ethoxyneoavarone | Sesquiterpene | Cytotoxic activity                                                     | <i>Dysidea avara</i> | The south China sea                | 70 | New |
| (5S,8S,9R,10S)-19-Ethoxyneoavarone | Sesquiterpene | Cytotoxic activity                                                     | <i>Dysidea avara</i> | The south China sea                | 70 | New |



|                                                                     |                                           |                                                                                                            |                          |                                    |    |       |
|---------------------------------------------------------------------|-------------------------------------------|------------------------------------------------------------------------------------------------------------|--------------------------|------------------------------------|----|-------|
| (5 <i>R</i> ,8 <i>R</i> ,9 <i>S</i> ,10 <i>R</i> )-18-Ethoxyavarone | Sesquiterpene                             | Cytotoxic activity                                                                                         | <i>Dysidea avara</i>     | The south China sea                | 70 | New   |
| (5 <i>R</i> ,8 <i>R</i> ,9 <i>S</i> ,10 <i>R</i> )-19-Ethoxyavarone | Sesquiterpene                             | Cytotoxic activity                                                                                         | <i>Dysidea avara</i>     | The south China sea                | 70 | New   |
| Avarol                                                              | Sesquiterpene                             | Cytotoxic activity                                                                                         | <i>Dysidea avara</i> - . | The south China sea                | 70 | Known |
|                                                                     |                                           | Cytotoxic activity - NF- $\kappa$ B inhibiting activity - protein kinase inhibition - Insecticidal activit | <i>Dysidea avara</i>     | Mediterranean Sea (Fethiye,Turkey) | 68 |       |
|                                                                     |                                           |                                                                                                            | <i>Dysidea avara</i>     |                                    | 69 |       |
|                                                                     |                                           | NA                                                                                                         | <i>Dysidea avara</i>     | The Northwest Mediterranean sea    | 67 |       |
|                                                                     |                                           | Protein Tyrosine Phosphatase 1B Inhibitory Activity                                                        | <i>Dysidea sp</i>        | Iriomote Island, Okinawa, Japan    | 71 |       |
| Biaketide                                                           | Miscellaneous compound                    | Cytotoxic activity                                                                                         | <i>Dysidea sp</i>        | Biak, West Papua, Indonesia        | 72 | New   |
| Debromoantazirine                                                   | Nitrogenous compound (azirine) derivative | Cytotoxic activity                                                                                         | <i>Dysidea sp</i>        | Biak, West Papua, Indonesia        | 72 | New   |
| Antazirine                                                          | Nitrogenous compound (azirine) derivative | NA                                                                                                         | <i>Dysidea sp</i>        | Biak, West Papua, Indonesia        | 72 | Known |
| Dysidazirine                                                        | Nitrogenous compound (azirine) derivative | NA                                                                                                         | <i>Dysidea sp</i>        | Biak, West Papua, Indonesia        | 72 | Known |

|                                            |                        |                                                                                                            |                    |                                  |    |       |
|--------------------------------------------|------------------------|------------------------------------------------------------------------------------------------------------|--------------------|----------------------------------|----|-------|
| neoavarol                                  | Sesquiterpene          | NA                                                                                                         | <i>Dysidea sp</i>  | Biak, West Papua, Indonesia      | 72 | Known |
|                                            |                        | Protein Tyrosine Phosphatase 1B Inhibitory Activity                                                        | <i>Dysidea sp</i>  | Iriomote Island, Okinawa, Japan. | 71 |       |
| Fronodosin                                 | Miscellaneous compound | NA                                                                                                         | <i>Dysidea sp</i>  | Biak, West Papua, Indonesia      | 72 | Known |
| Dysidinoid A                               | Meroterpene            | Antibacterial activity                                                                                     | <i>Dysidea sp.</i> | Yongxing Island, Xiasha          | 73 | New   |
| 2-(20,40-Dibromophenoxy)-4,6-dibromophenol | Halogenated compound   | Antibacterial activity                                                                                     | <i>Dysidea sp.</i> | not detected                     | 74 | Known |
| Aureol B                                   | Meroterpene            | Cytotoxic and antimicrobial activities and weak inhibition against Na <sup>+</sup> /K <sup>+</sup> -ATPase | <i>Dysidea sp.</i> | Federated States of Micronesia   | 75 | New   |
| Melemeleone C                              | Meroterpene            | Cytotoxic and antimicrobial activities and weak inhibition against Na <sup>+</sup> /K <sup>+</sup> -ATPase | <i>Dysidea sp.</i> | Federated States of Micronesia   | 75 | New   |
| Melemeleone D                              | Meroterpene            | Cytotoxic and antimicrobial activities and weak inhibition against Na <sup>+</sup> /K <sup>+</sup> -ATPase | <i>Dysidea sp.</i> | Federated States of Micronesia   | 75 | New   |
| Cycloaurenone A                            | Meroterpene            | Cytotoxic and antimicrobial activities and weak inhibition against Na <sup>+</sup> /K <sup>+</sup> -ATPase | <i>Dysidea sp.</i> | Federated States of Micronesia   | 75 | New   |

|                  |                       |                                                                                                            |                        |                                |    |       |
|------------------|-----------------------|------------------------------------------------------------------------------------------------------------|------------------------|--------------------------------|----|-------|
| Cycloaurenone B  | Meroterpene           | Cytotoxic and antimicrobial activities and weak inhibition against Na <sup>+</sup> /K <sup>+</sup> -ATPase | <i>Dysidea sp.</i>     | Federated States of Micronesia | 75 | New   |
| Cycloaurenone C  | Meroterpene           | Cytotoxic and antimicrobial activities and weak inhibition against Na <sup>+</sup> /K <sup>+</sup> -ATPase | <i>Dysidea sp.</i>     | Federated States of Micronesia | 75 | New   |
| Arenarol         | Drimane sesquiterpene | Cytotoxic and antimicrobial activities and weak inhibition against Na <sup>+</sup> /K <sup>+</sup> -ATPase | <i>Dysidea sp.</i>     | Federated States of Micronesia | 75 | Known |
| Dysidphenol A    | Sesquiterpene         | Antibacterial                                                                                              | <i>Dysidea species</i> | The south China sea            | 76 | New   |
| Dysidphenol B    | Sesquiterpene         | NA                                                                                                         | <i>Dysidea species</i> | The south China sea            | 76 | New   |
| Dysidphenol C    | Sesquiterpene         | Antibacterial                                                                                              | <i>Dysidea species</i> | The south China sea            | 76 | New   |
| Smenospongimine  | Sesquiterpene         | Antibacterial                                                                                              | <i>Dysidea species</i> | The south China sea            | 76 | New   |
| Smenospongine    | Sesquiterpene         | Antibacterial                                                                                              | <i>Dysidea species</i> | The south China sea            | 76 | Known |
| Smenospongiorine | Sesquiterpene         | Antibacterial                                                                                              | <i>Dysidea species</i> | The south China sea            | 76 | Known |
| Smenospongjarine | Sesquiterpene         | Antibacterial                                                                                              | <i>Dysidea species</i> | The south China sea            | 76 | Known |
| Smenospongidine  | Sesquiterpene         | Antibacterial                                                                                              | <i>Dysidea species</i> | The south China sea            | 76 | Known |

|                                                              |                        |                                                     |                        |                                               |    |       |
|--------------------------------------------------------------|------------------------|-----------------------------------------------------|------------------------|-----------------------------------------------|----|-------|
| Avapyran                                                     | Sesquiterpene          | Protein Tyrosine Phosphatase 1B Inhibitory Activity | <i>Dysidea sp.</i>     | Iriomote Island, Okinawa, Japan.              | 71 | New   |
| 17- <i>O</i> -Acetylavarol                                   | Sesquiterpene          | Protein Tyrosine Phosphatase 1B Inhibitory Activity | <i>Dysidea sp.</i>     | Iriomote Island, Okinawa, Japan.              | 71 | New   |
| 17- <i>O</i> -Acetylneoavarol                                | Sesquiterpene          | Protein Tyrosine Phosphatase 1B Inhibitory Activity | <i>Dysidea sp.</i>     | Iriomote Island, Okinawa, Japan.              | 71 | New   |
| 20- <i>O</i> -Acetylavarol                                   | Sesquiterpene          | Protein Tyrosine Phosphatase 1B Inhibitory Activity | <i>Dysidea sp.</i>     | Iriomote Island, Okinawa, Japan.              | 71 | Known |
| 20- <i>O</i> -Acetylneoavarol                                | Sesquiterpene          | Protein Tyrosine Phosphatase 1B Inhibitory Activity | <i>Dysidea sp.</i>     | Iriomote Island, Okinawa, Japan.              | 71 | Known |
| 3'-Aminoavarone                                              | Sesquiterpene          | Protein Tyrosine Phosphatase 1B Inhibitory Activity | <i>Dysidea sp.</i>     | Iriomote Island, Okinawa, Japan.              | 71 | Known |
| Dysiroid A                                                   | Sterol                 | Antibacterial activity                              | <i>Dysidea sp.</i>     | Dongshan Island, Guangdong Province, PR China | 77 | New   |
| Dysiroid B                                                   | Sterol                 | Antibacterial activity                              | <i>Dysidea sp.</i>     | Dongshan Island, Guangdong Province, PR China | 77 | New   |
| (5 <i>R</i> )-3,15,27-Triacontatriene-1,29-diyne-5-ol        | Miscellaneous compound | Antibacterial activity                              | <i>Dysidea sp.</i>     | Dongshan Island, Guangdong Province, PR China | 77 | Known |
| (4 <i>R</i> ,5 <i>R</i> )-Muurool-1(6),10(14)-diene-4,5-diol | Sesquiterpene          | NA                                                  | <i>Dysidea cinerea</i> | Lang Co beach, Thua Thien Hue, Vietnam        | 78 | New   |

|                                                                                                   |                        |                                         |                         |                                              |    |     |
|---------------------------------------------------------------------------------------------------|------------------------|-----------------------------------------|-------------------------|----------------------------------------------|----|-----|
| (4 <i>R</i> ,5 <i>R</i> )-Muurool-1(6)-ene-4,5-diol                                               | Sesquiterpene          | NA                                      | <i>Dysidea cinerea</i>  | Lang Co beach,<br>Thua Thien Hue,<br>Vietnam | 78 | New |
| (4 <i>R</i> ,5 <i>R</i> ,10 <i>R</i> )-10-Methoxymuurool-1(6)-ene-4,5-diol                        | Sesquiterpene          | NA                                      | <i>Dysidea cinerea</i>  | Lang Co beach,<br>Thua Thien Hue,<br>Vietnam | 78 | New |
| (4 <i>S</i> )-4-Hydroxy-1,10-seco-muurool-5-ene-1,10-dione                                        | Sesquiterpene          | NA                                      | <i>Dysidea cinerea</i>  | Lang Co beach,<br>Thua Thien Hue,<br>Vietnam | 78 | New |
| (4 <i>R</i> )-4-Hydroxy-1,10-seco-muurool-5-ene-1,10-dione                                        | Sesquiterpene          | NA                                      | <i>Dysidea cinerea</i>  | Lang Co beach,<br>Thua Thien Hue,<br>Vietnam | 78 | New |
| (6 <i>S</i> ,10 <i>S</i> )-6,10-Dihydroxy-7,8-seco-2,8-cyclo-muurool-4(5),7(11)-diene-12-oic acid | Sesquiterpene          | NA                                      | <i>Dysidea cinerea</i>  | Lang Co beach,<br>Thua Thien Hue,<br>Vietnam | 78 | New |
| (6 <i>R</i> ,10 <i>S</i> )-6,10-Dihydroxy-7,8-seco-2,8-cyclo-muurool-4(5),7(11)-diene-12-oic acid | Sesquiterpene          | NA                                      | <i>Dysidea cinerea</i>  | Lang Co beach,<br>Thua Thien Hue,<br>Vietnam | 78 | New |
| Dysideolide A                                                                                     | Miscellaneous compound | NA                                      | <i>Dysidea cinerea</i>  | Lang Co beach,<br>Vietnam                    | 79 | New |
| Dysideolide B                                                                                     | Miscellaneous compound | NA                                      | <i>Dysidea cinerea</i>  | Lang Co beach,<br>Vietnam                    | 79 | New |
| Dysidaminone A                                                                                    | Sesquiterpene          | Cytotoxic & NF-kB inhibitory activities | <i>Dysidea fragilis</i> | Yongxing Island,<br>South China Sea          | 80 | New |
| Dysidaminone B                                                                                    | Sesquiterpene          | Cytotoxic & NF-kB inhibitory activities | <i>Dysidea fragilis</i> | Yongxing Island,<br>South China Sea          | 80 | New |
| Dysidaminone C                                                                                    | Sesquiterpene          | Cytotoxic & NF-kB inhibitory activities | <i>Dysidea fragilis</i> | Yongxing Island,<br>South China Sea          | 80 | New |
| Dysidaminone D                                                                                    | Sesquiterpene          | Cytotoxic & NF-kB inhibitory activities | <i>Dysidea fragilis</i> | Yongxing Island,<br>South China Sea          | 80 | New |

|                          |               |                                         |                         |                                  |    |       |
|--------------------------|---------------|-----------------------------------------|-------------------------|----------------------------------|----|-------|
| Dysidaminone E           | Sesquiterpene | Cytotoxic & NF-kB inhibitory activities | <i>Dysidea fragilis</i> | Yongxing Island, South China Sea | 80 | New   |
| Dysidaminone F           | Sesquiterpene | Cytotoxic & NF-kB inhibitory activities | <i>Dysidea fragilis</i> | Yongxing Island, South China Sea | 80 | New   |
| Dysidaminone G           | Sesquiterpene | Cytotoxic & NF-kB inhibitory activities | <i>Dysidea fragilis</i> | Yongxing Island, South China Sea | 80 | New   |
| Dysidaminone H           | Sesquiterpene | Cytotoxic & NF-kB inhibitory activities | <i>Dysidea fragilis</i> | Yongxing Island, South China Sea | 80 | New   |
| Dysidaminone I           | Sesquiterpene | Cytotoxic & NF-kB inhibitory activities | <i>Dysidea fragilis</i> | Yongxing Island, South China Sea | 80 | New   |
| Dysidaminone J           | Sesquiterpene | Cytotoxic & NF-kB inhibitory activities | <i>Dysidea fragilis</i> | Yongxing Island, South China Sea | 80 | New   |
| Dysidaminone K           | Sesquiterpene | Cytotoxic & NF-kB inhibitory activities | <i>Dysidea fragilis</i> | Yongxing Island, South China Sea | 80 | New   |
| Dysidaminone L           | Sesquiterpene | Cytotoxic & NF-kB inhibitory activities | <i>Dysidea fragilis</i> | Yongxing Island, South China Sea | 80 | New   |
| Dysidaminone M           | Sesquiterpene | Cytotoxic & NF-kB inhibitory activities | <i>Dysidea fragilis</i> | Yongxing Island, South China Sea | 80 | New   |
| 18-Methylaminoavarone    | Sesquiterpene | Cytotoxic & NF-kB inhibitory activities | <i>Dysidea fragilis</i> | Yongxing Island, South China Sea | 80 | Known |
| 19-Methylaminoavarone    | Sesquiterpene | Cytotoxic & NF-kB inhibitory activities | <i>Dysidea fragilis</i> | Yongxing Island, South China Sea | 80 | Known |
| 18-Aminoavarone          | Sesquiterpene | Cytotoxic & NF-kB inhibitory activities | <i>Dysidea fragilis</i> | Yongxing Island, South China Sea | 80 | Known |
| 19-Aminoavarone          | Sesquiterpene | Cytotoxic & NF-kB inhibitory activities | <i>Dysidea fragilis</i> | Yongxing Island, South China Sea | 80 | Known |
| 18-Phenethylaminoavarone | Sesquiterpene | Cytotoxic & NF-kB inhibitory activities | <i>Dysidea fragilis</i> | Yongxing Island, South China Sea | 80 | Known |

|                                                                                                   |               |                                                       |                         |                                        |    |       |
|---------------------------------------------------------------------------------------------------|---------------|-------------------------------------------------------|-------------------------|----------------------------------------|----|-------|
| Popolohuanone D                                                                                   | Sesquiterpene | Cytotoxic & NF-kB inhibitory activities               | <i>Dysidea fragilis</i> | Yongxing Island, South China Sea       | 80 | Known |
| Dysinidin A                                                                                       | Sesquiterpene | NA                                                    | <i>Dysidea fragilis</i> | Vandon, Quangninh                      | 81 | New   |
| Dysinidin B                                                                                       | Sesquiterpene | NA                                                    | <i>Dysidea fragilis</i> | Vandon, Quangninh                      | 81 | New   |
| Furodysin in lactone                                                                              | Sesquiterpene | NA                                                    | <i>Dysidea fragilis</i> | Vandon, Quangninh                      | 81 | Known |
| O-Methyl furodysin in lactone                                                                     | Sesquiterpene | NA                                                    | <i>Dysidea fragilis</i> | Vandon, Quangninh                      | 81 | Known |
| Dysinidin C                                                                                       | Sesquiterpene | NA                                                    | <i>Dysidea fragilis</i> | Vandon, Quangninh                      | 82 | New   |
| Dysinidin D                                                                                       | Sesquiterpene | NA                                                    | <i>Dysidea fragilis</i> | Vandon, Quangninh                      | 82 | New   |
| Dysinidin E                                                                                       | Sesquiterpene | NA                                                    | <i>Dysidea fragilis</i> | Vandon, Quangninh                      | 82 | New   |
| Dysideasterol F                                                                                   | Sterol        | Cytotoxic activity                                    | <i>Dysidea fragilis</i> | Vandon, Quangninh                      | 82 | Known |
| 9 $\alpha$ ,11 $\alpha$ -Epoxycholest-7-en-3 $\beta$ ,5 $\alpha$ ,6 $\alpha$ -triol               | Sterol        | Cytotoxic activity                                    | <i>Dysidea fragilis</i> | Vandon, Quangninh                      | 82 | Known |
| 9 $\alpha$ ,11 $\alpha$ -Epoxycholest-7-en-3 $\beta$ ,5 $\alpha$ ,6 $\alpha$ ,19-tetrol 6-acetate | Sterol        | Cytotoxic activity                                    | <i>Dysidea fragilis</i> | Vandon, Quangninh                      | 82 | Known |
| Dysifragilone A                                                                                   | Sesquiterpene | Anti-inflammatory activity                            | <i>Dysidea fragilis</i> | Yongxing Island in the South China Sea | 83 | Known |
| Dysivillosin A                                                                                    | Meroterpene   | Antiallergic- Down regulation of production of lipids | <i>Dysidea villosa</i>  | The south China sea                    | 84 | New   |

|                                                 |                      |                                                       |                          |                                   |    |       |
|-------------------------------------------------|----------------------|-------------------------------------------------------|--------------------------|-----------------------------------|----|-------|
| Dysivillosin B                                  | Meroterpene          | Antiallergic- Down regulation of production of lipids | <i>Dysidea villosa</i>   | The south China sea               | 84 | New   |
| Dysivillosin C                                  | Meroterpene          | Antiallergic- Down regulation of production of lipids | <i>Dysidea villosa</i>   | The south China sea               | 84 | New   |
| Dysivillosin D                                  | Meroterpene          | Antiallergic- Down regulation of production of lipids | <i>Dysidea villosa</i>   | The south China sea               | 84 | New   |
| 2-(20,40-Dibromophenoxy)-3,5-dibromophenol      | Halogenated compound | Antibacterial activity                                | <i>Dysidea granulosa</i> | Not detected                      | 74 | Known |
| 2-(20,40-Dibromophenoxy)- 3,4,5-tribromophenol  | Halogenated compound | Antibacterial activity                                | <i>Dysidea granulosa</i> | Not detected                      | 74 | Known |
| 3,5-Dibromo-2-(2,4-dibromophenoxy)phenol        | Halogenated compound | Antimicrobial                                         | <i>Dysidea granulosa</i> | Papua New Guinea                  | 85 | known |
|                                                 |                      | Cytotoxic activity                                    | <i>Dysidea sp.</i>       | Palau Islands- Maumere, Indonesia | 86 |       |
| 2,4-dibromo-6-(2,4-dibromophenoxy)phenol        | Halogenated compound | Antimicrobial                                         | <i>Dysidea granulosa</i> | Papua New Guinea - Palau Islands  | 85 | known |
| 3,4,5-Tribromo-2-(2,4-dibromophenoxy)phenol     | Halogenated compound | Antimicrobial                                         | <i>Dysidea granulosa</i> | Papua New Guinea - Palau Islands  | 85 | known |
| 2,3,4-Tribromo-6-(2,4-dibromophenoxy)phenol     | Halogenated compound | Antimicrobial                                         | <i>Dysidea granulosa</i> | Papua New Guinea - Palau Islands  | 85 | known |
| 2,3,4,5-Tetrabromo-6-(2,4-dibromophenoxy)phenol | Halogenated compound | Antimicrobial                                         | <i>Dysidea granulosa</i> | Papua New Guinea - Palau Islands  | 85 | known |



|                                                                                                                                                                      |                      |                                   |                             |                                  |    |       |
|----------------------------------------------------------------------------------------------------------------------------------------------------------------------|----------------------|-----------------------------------|-----------------------------|----------------------------------|----|-------|
| 1,5-Dibromo-3-(2,4-dibromophenoxy)-2-methylbenzene                                                                                                                   | Halogenated compound | NA                                | <i>Dysidea granulosa</i>    | Papua New Guinea - Palau Islands | 85 | known |
| ((3aS,3bR,5aS,9aS,9bR,10S)-10-Hydroxy-6,6,9a-trimethyl-1-oxo-1,3,3a,3b,4,5,5a,6,7,8,9,9a,9b,10-tetradecahydrophenanthro[1,2-c]furan-3b-yl)methyl 3-methylbutanoate   | Diterpene            | Cytotoxic activity                | <i>Dysidea cf. arenaria</i> | Irabu Island, Okinawa            | 87 | New   |
| ((3aR,3bR,5aS,9aS,9bR,10S,11aR)-10-Hydroxy-6,6,9a-trimethyl-1-oxohexadecahydrophenanthro[1,2-c]furan-3b-yl)methyl 3-methylbutanoate                                  | Diterpene            | Cytotoxic activity                | <i>Dysidea cf. arenaria</i> | Irabu Island, Okinawa            | 87 | New   |
| ((4aS,4bR,5S,8S,8aS,10aS)-7,8-Diformyl-5-hydroxy-1,1,4a-trimethyl-1,2,3,4,4a,4b,5,8,8a,9,10,10a-dodecahydrophenanthren-8a-yl)methyl 3-methylbutanoate                | Diterpene            | Cytotoxic activity                | <i>Dysidea cf. arenaria</i> | Irabu Island, Okinawa            | 87 | New   |
| (1R,3R,4S,5R,5aS,7aS,11aS,11bR,12R)-5-Formyl-8,8,11a-trimethyl-5a-(((3-methylbutanoyl)oxy)methyl)tetradecahydro-1,4-methanonaphtho[1,2-c]oxepine-3,12-diyl diacetate | Diterpene            | Cytotoxic activity                | <i>Dysidea cf. arenaria</i> | Irabu Island, Okinawa            | 87 | New   |
| Septosone A                                                                                                                                                          | Meroterpene          | Anti-inflammatory activity        | <i>Dysidea septosa</i>      | The south China sea              | 88 | New   |
| Septosone B                                                                                                                                                          | Meroterpene          | NA                                | <i>Dysidea septosa</i>      | The south China sea              | 88 | New   |
| Septosone C                                                                                                                                                          | Meroterpene          | Anti-inflammatory activity (weak) | <i>Dysidea septosa</i>      | The south China sea              | 88 | New   |

|                                                       |                      |                                                                                   |                                |                             |    |       |
|-------------------------------------------------------|----------------------|-----------------------------------------------------------------------------------|--------------------------------|-----------------------------|----|-------|
| 2-(30,50-Dibromo-20-methoxyphenoxy)-3,5-dibromophenol | Halogenated compound | Inhibit Protein tyrosine phosphatase 1B activity<br>- Moderate cytotoxic activity | <i>Lamellodysidea herbacea</i> | Manado, Indonesia           | 89 | Known |
| Lamellodysidine A                                     | Sesquiterpene        | NA                                                                                | <i>Lamellodysidea herbacea</i> | Manadotua Island, Indonesia | 90 | New   |
| Lamellodysidine B                                     | Sesquiterpene        | NA                                                                                | <i>Lamellodysidea herbacea</i> | Manadotua Island, Indonesia | 90 | New   |
| O,Odimethylingshuiolide A                             | Sesquiterpene        | NA                                                                                | <i>Lamellodysidea herbacea</i> | Manadotua Island, Indonesia | 90 | New   |
| 11-epi-O,O-dimethylingshuiolide A                     | Sesquiterpene        | NA                                                                                | <i>Lamellodysidea herbacea</i> | Manadotua Island, Indonesia | 90 | New   |
| 3,5-Dibromobenzene-1,2-diol                           | Halogenated compound | NA                                                                                | <i>Lamellodysidea sp.</i>      | Papua New Guinea            | 85 | Known |
| 3,5-Dibromo-2-(3,5-dibromo-2-hydroxyphenoxy)phenol    | Halogenated compound | Antimicrobial                                                                     | <i>Lamellodysidea sp.</i>      | Papua New Guinea            | 85 | Known |
| 3,4,6-Tribromo-2-(3,5-dibromo-2-hydroxyphenoxy)phenol | Halogenated compound | Antimicrobial                                                                     | <i>Lamellodysidea sp.</i>      | Papua New Guinea            | 85 | Known |
| 2,3,5-Tribromo-6-(3,5-dibromo-2-hydroxyphenoxy)phenol | Halogenated compound | Antimicrobial                                                                     | <i>Lamellodysidea sp.</i>      | Papua New Guinea            | 85 | Known |
| 2,3,4-Tribromo-6-(3,5-dibromo-2-hydroxyphenoxy)phenol | Halogenated compound | Antimicrobial                                                                     | <i>Lamellodysidea sp.</i>      | Papua New Guinea            | 85 | Known |

|                                                                         |                        |                                                     |                            |                                    |    |       |
|-------------------------------------------------------------------------|------------------------|-----------------------------------------------------|----------------------------|------------------------------------|----|-------|
| 3,4,5-Tribromo-2-(3,5-dibromo-2-hydroxyphenoxy)phenol                   | Halogenated compound   | Antimicrobial                                       | <i>Lamellodysidea sp.</i>  | Papua New Guinea                   | 85 | Known |
|                                                                         |                        | Cytotoxic activity                                  | <i>Dysidea sp.</i>         | Maumere, Indonesia                 | 86 |       |
| 2,3,4,5-Tetrabromo-6-(3,5-dibromo-2-hydroxyphenoxy)phenol               | Halogenated compound   | Antimicrobial                                       | <i>Lamellodysidea sp.</i>  | Papua New Guinea                   | 85 | Known |
| 1-(3',5',6'-Tribromo-4'-methoxy-1'-hydroxyphenoxy)-3,5-dibromo-2-phenol | Halogenated compound   | Antimicrobial                                       | <i>Lamellodysidea sp.</i>  | Papua New Guinea                   | 85 | New   |
| <b>C- Family: Spongiidae</b>                                            |                        |                                                     |                            |                                    |    |       |
| (+)-Sponalisolide A                                                     | Miscellaneous compound | Antibacterial against <i>Pseudomonas aeruginosa</i> | <i>Spongia officinalis</i> | The coast of Weizhou island, China | 91 | New   |
| (-)-Sponalisolide A                                                     | Miscellaneous compound | Antibacterial against <i>Pseudomonas aeruginosa</i> | <i>Spongia officinalis</i> | The coast of Weizhou island, China | 91 | New   |
| (+)-Sponalisolide B                                                     | Miscellaneous compound | Antibacterial against <i>Pseudomonas aeruginosa</i> | <i>Spongia officinalis</i> | The coast of Weizhou island, China | 91 | New   |
| (-)-Sponalisolide B                                                     | Miscellaneous compound | Antibacterial against <i>Pseudomonas aeruginosa</i> | <i>Spongia officinalis</i> | The coast of Weizhou island, China | 91 | New   |
| 3-Nor-spongiolide A                                                     | Diterpene              | NA                                                  | <i>Spongia officinalis</i> | South China Sea                    | 92 | New   |
| Spongiolide A                                                           | Diterpene              | NA                                                  | <i>Spongia officinalis</i> | South China Sea                    | 92 | New   |
| Spongiolide B                                                           | Diterpene              | NA                                                  | <i>Spongia officinalis</i> | South China Sea                    | 92 | New   |

|                                                         |           |                                                                                          |                                    |                          |               |       |
|---------------------------------------------------------|-----------|------------------------------------------------------------------------------------------|------------------------------------|--------------------------|---------------|-------|
| Spongia-13(16),14-diene                                 | Diterpene | NA                                                                                       | <i>Spongia officinalis</i>         | South China Sea          | <sup>92</sup> | Known |
| 18-nor-3,17-Dihydroxyspongia-3,13(16),14-trien-2-one    | Diterpene | NA                                                                                       | <i>Spongia officinalis</i>         | South China Sea          | <sup>92</sup> | Known |
| Spongiatriol                                            | Diterpene | NA                                                                                       | <i>Spongia officinalis</i>         | South China Sea          | <sup>92</sup> | Known |
|                                                         |           | Antiviral activity & Cytotoxic activity                                                  | <i>Hyattella aff. Intestinalis</i> | Iriomote Island, Okinawa | <sup>93</sup> |       |
| Isospongiatriol                                         | Diterpene | NA                                                                                       | <i>Spongia officinalis</i>         | South China Sea          | <sup>92</sup> | Known |
|                                                         |           | Antiviral activity & Cytotoxic activity                                                  | <i>Hyattella aff. Intestinalis</i> | Iriomote Island, Okinawa | <sup>93</sup> |       |
| Epispongiatriol                                         | Diterpene | NA                                                                                       | <i>Spongia officinalis</i>         | South China Sea          | <sup>92</sup> | Known |
|                                                         |           | Antiviral activity & Cytotoxic activity                                                  | <i>Hyattella aff. Intestinalis</i> | Iriomote Island, Okinawa | <sup>93</sup> |       |
| 17,19-Dihydroxyspongia-13(16),14-dien-2,3-dione         | Diterpene | NA                                                                                       | <i>Spongia officinalis</i>         | South China Sea          | <sup>92</sup> | Known |
| 18-nor-3,17-dihydroxyspongia-3,13(16),14-trien-2-one    | Diterpene | Inhibition of TNF- $\alpha$ -activated NF- $\kappa$ B activity - Inhibition of aromatase | <i>Spongia sp</i>                  | Sulawesi, Indonesia      | <sup>94</sup> | New   |
| 18-nor-3,5,17-trihydroxyspongia-3,13(16),14-trien-2-one | Diterpene | Inhibition of TNF- $\alpha$ -activated NF- $\kappa$ B activity                           | <i>Spongia sp</i>                  | Sulawesi, Indonesia      | <sup>94</sup> | New   |

|                                                                                                                                                                                                                                                                                                         |               |                                                                |                    |                                          |    |       |
|---------------------------------------------------------------------------------------------------------------------------------------------------------------------------------------------------------------------------------------------------------------------------------------------------------|---------------|----------------------------------------------------------------|--------------------|------------------------------------------|----|-------|
| Songiapyridine                                                                                                                                                                                                                                                                                          | Diterpene     | Inhibition of TNF- $\alpha$ -activated NF- $\kappa$ B activity | <i>Spongia sp</i>  | Sulawesi, Indonesia                      | 94 | New   |
| 17-Hydroxy-4-epi-spongialactone A                                                                                                                                                                                                                                                                       | Diterpene     | Inhibition of TNF- $\alpha$ -activated NF- $\kappa$ B activity | <i>Spongia sp</i>  | Sulawesi, Indonesia                      | 94 | Known |
| (1 <i>R</i> ,5 <i>bR</i> ,11 <i>aS</i> ,13 <i>aS</i> ,13 <i>bR</i> )-1-Methoxy-5 <i>b</i> ,8,8,11 <i>a</i> ,13 <i>a</i> -pentamethyl-1,5,5 <i>a</i> ,6,7,7 <i>a</i> ,8,9,10,11,11 <i>a</i> ,11 <i>b</i> ,12,13,13 <i>a</i> ,13 <i>b</i> -hexadecahydrochryseno[1,2- <i>c</i> ]furan-3(5 <i>bH</i> )-one | Sesterterpene | NA                                                             | <i>Spongia sp</i>  | Geoje Island, South Sea of Korea         | 95 | New   |
| (1 <i>R</i> ,4 <i>bR</i> ,10 <i>aS</i> ,12 <i>R</i> ,12 <i>aS</i> )-Methyl 1-formyl-12-hydroxy-4 <i>b</i> ,7,7,10 <i>a</i> ,12 <i>a</i> -pentamethyl-1,4,4 <i>a</i> ,4 <i>b</i> ,5,6,6 <i>a</i> ,7,8,9,10,10 <i>a</i> ,10 <i>b</i> ,11,12,12 <i>a</i> -hexadecahydrochryseno-2-carboxylate              | Sesterterpene | NA                                                             | <i>Spongia sp</i>  | Geoje Island, South Sea of Korea         | 95 | New   |
| Furospingin-1                                                                                                                                                                                                                                                                                           | Sesterterpene | Protein tyrosine phosphatase (PTP) 1B inhibitor                | <i>Spongia sp.</i> | Manado, Indonesia                        | 96 | New   |
| Langcoquinone D                                                                                                                                                                                                                                                                                         | Sesquiterpene | Antibacterial & cytotoxic activity                             | <i>Spongia sp.</i> | Thua Thien-Hue city, Vietnam             | 97 | New   |
| Langcoquinone E                                                                                                                                                                                                                                                                                         | Sesquiterpene | NA                                                             | <i>Spongia sp.</i> | Thua Thien-Hue city, Vietnam             | 97 | New   |
| Langcoquinone F                                                                                                                                                                                                                                                                                         | Sesquiterpene | NA                                                             | <i>Spongia sp.</i> | Thua Thien-Hue city, Vietnam             | 97 | New   |
| Scalalactam A                                                                                                                                                                                                                                                                                           | Sesterterpene | NA                                                             | <i>Spongia sp.</i> | The South Sea near Tong-Yong City, Korea | 98 | New   |
| Scalalactam B                                                                                                                                                                                                                                                                                           | Sesterterpene | NA                                                             | <i>Spongia sp.</i> | The South Sea near Tong-Yong City, Korea | 98 | New   |

|                                                    |               |                                                |                              |                                          |     |       |
|----------------------------------------------------|---------------|------------------------------------------------|------------------------------|------------------------------------------|-----|-------|
| Scalalactam C                                      | Sesterterpene | NA                                             | <i>Spongia sp.</i>           | The South Sea near Tong-Yong City, Korea | 98  | New   |
| Scalalactam D                                      | Sesterterpene | NA                                             | <i>Spongia sp.</i>           | The South Sea near Tong-Yong City, Korea | 98  | New   |
| 18-Deoxy-18-formamidodictyoceratin B               | Sesquiterpene | Cytotoxic activity                             | <i>Spongia pertusa Esper</i> | Yongxing Island                          | 99  | New   |
| 18-Deoxy-18-(2-hydroxyacetyl)aminodictyoceratin B  | Sesquiterpene | Cytotoxic activity                             | <i>Spongia pertusa Esper</i> | Yongxing Island                          | 99  | New   |
| Dictyoceratin D                                    | Sesquiterpene | Cytotoxic activity                             | <i>Spongia pertusa Esper</i> | Yongxing Island                          | 99  | New   |
| N-Methyl-ent-smenospongine                         | Sesquiterpene | Cytotoxic activity                             | <i>Spongia pertusa Esper</i> | Yongxing Island                          | 99  | New   |
| N-Methyl-5-epi-smenospongine                       | Sesquiterpene | Cytotoxic activity                             | <i>Spongia pertusa Esper</i> | Yongxing Island                          | 99  | New   |
| 20-Demethoxy-20-methylaminodactyloquinone D        | Sesquiterpene | Cytotoxic activity                             | <i>Spongia pertusa Esper</i> | Yongxing Island                          | 99  | New   |
| 20-Demethoxy-20-methylamino-5-epi-dactyloquinone D | Sesquiterpene | Cytotoxic activity                             | <i>Spongia pertusa Esper</i> | Yongxing Island                          | 99  | New   |
| 20-Demethoxy-20-methylaminodactyloquinone B        | Sesquiterpene | Cytotoxic activity                             | <i>Spongia pertusa Esper</i> | Yongxing Island                          | 99  | New   |
| Yahazunol B                                        | Sesquiterpene | Cytotoxic activity                             | <i>Spongia pertusa Esper</i> | Yongxing Island                          | 99  | New   |
| 5-epi-smenospongine                                | Sesquiterpene | Cytotoxic activity                             | <i>Spongia pertusa Esper</i> | Yongxing Island                          | 99  | Known |
| Smenospongiadine                                   | Sesquiterpene | Cytotoxic activity                             | <i>Spongia pertusa Esper</i> | Yongxing Island                          | 99  | Known |
| Ceylonamide A                                      | Diterpene     | Inhibition of RANKL induced osteoclastogenesis | <i>Spongia ceylonensis</i>   | Indonesia                                | 100 | New   |
| Ceylonamide B                                      | Diterpene     | Inhibition of RANKL induced osteoclastogenesis | <i>Spongia ceylonensis</i>   | Indonesia                                | 100 | New   |
| Ceylonamide C                                      | Diterpene     | Inhibition of RANKL induced osteoclastogenesis | <i>Spongia ceylonensis</i>   | Indonesia                                | 100 | New   |
| Ceylonamide D                                      | Diterpene     | Inhibition of RANKL induced osteoclastogenesis | <i>Spongia ceylonensis</i>   | Indonesia                                | 100 | New   |
| Ceylonamide E                                      | Diterpene     | Inhibition of RANKL induced osteoclastogenesis | <i>Spongia ceylonensis</i>   | Indonesia                                | 100 | New   |

|                                                   |           |                                                |                            |           |     |       |
|---------------------------------------------------|-----------|------------------------------------------------|----------------------------|-----------|-----|-------|
| Ceylonamide F                                     | Diterpene | Inhibition of RANKL induced osteoclastogenesis | <i>Spongia ceylonensis</i> | Indonesia | 100 | New   |
| 15 $\alpha$ ,16-dimethoxyspongi-13-en-19-oic acid | Diterpene | Inhibition of RANKL induced osteoclastogenesis | <i>Spongia ceylonensis</i> | Indonesia | 100 | New   |
| Haumanamide                                       | Diterpene | Inhibition of RANKL induced osteoclastogenesis | <i>Spongia ceylonensis</i> | Indonesia | 100 | Known |
| Spongia-13(16),14-dien-19-oic acid                | Diterpene | Inhibition of RANKL induced osteoclastogenesis | <i>Spongia ceylonensis</i> | Indonesia | 100 | Known |
| Spongiadiol                                       | Diterpene | Inhibition of RANKL induced osteoclastogenesis | <i>Spongia ceylonensis</i> | Indonesia | 100 | Known |
| Isospongiadiol                                    | Diterpene | Inhibition of RANKL induced osteoclastogenesis | <i>Spongia ceylonensis</i> | Indonesia | 100 | Known |
| Ceylonin A                                        | Diterpene | Inhibition of RANKL induced osteoclastogenesis | <i>Spongia ceylonensis</i> | Indonesia | 101 | New   |
| Ceylonin B                                        | Diterpene | Inhibition of RANKL induced osteoclastogenesis | <i>Spongia ceylonensis</i> | Indonesia | 101 | New   |
| Ceylonin C                                        | Diterpene | Inhibition of RANKL induced osteoclastogenesis | <i>Spongia ceylonensis</i> | Indonesia | 101 | New   |
| Ceylonin D                                        | Diterpene | Inhibition of RANKL induced osteoclastogenesis | <i>Spongia ceylonensis</i> | Indonesia | 101 | New   |
| Ceylonin E                                        | Diterpene | Inhibition of RANKL induced osteoclastogenesis | <i>Spongia ceylonensis</i> | Indonesia | 101 | New   |

|                                        |               |                                                             |                              |                        |     |       |
|----------------------------------------|---------------|-------------------------------------------------------------|------------------------------|------------------------|-----|-------|
| Ceylonin F                             | Diterpene     | Inhibition of RANKL induced osteoclastogenesis              | <i>Spongia ceylonensis</i>   | Indonesia              | 101 | New   |
| Spongia- 13(16),14-dien-19-oic acid    | Diterpene     | NA                                                          | <i>Spongia ceylonensis</i>   | Indonesia              | 101 | Known |
| Ceylonin G                             | Diterpene     | NA                                                          | <i>Spongia ceylonensis</i>   | Indonesia              | 102 | New   |
| Ceylonin H                             | Diterpene     | NA                                                          | <i>Spongia ceylonensis</i>   | Indonesia              | 102 | New   |
| Ceylonin I                             | Diterpene     | NA                                                          | <i>Spongia ceylonensis</i>   | Indonesia              | 102 | New   |
| ent-13-norisocopalen-15-al-18-oic acid | Diterpene     | Ubiquitin-specific protease 7 (USP7) inhibitor (anticancer) | <i>Spongia ceylonensis</i>   | Indonesia              | 102 | Known |
| 15-oxospongi-13-en-19-oic acid         | Diterpene     | NA                                                          | <i>Spongia ceylonensis</i>   | Indonesia              | 102 | Known |
|                                        |               | NA                                                          | <i>Spongia ceylonensis</i>   | Indonesia              | 100 |       |
| 16-Oxospongi-13-en-19-oic acid         | Diterpene     | NA                                                          | <i>Spongia ceylonensis</i>   | Indonesia              | 102 | Known |
|                                        |               |                                                             | <i>Spongia ceylonensis</i>   | Indonesia              | 100 |       |
| Spongiabutenolide A                    | Diterpene     | NA                                                          | <i>Spongia ceylonensis</i>   | Indonesia              | 102 | Known |
|                                        |               |                                                             | <i>Spongia ceylonensis</i>   | Indonesia              | 100 |       |
| Spongiabutenolide B                    | Diterpene     | NA                                                          | <i>Spongia ceylonensis</i>   | Indonesia              | 102 | Known |
|                                        |               |                                                             | <i>Spongia ceylonensis</i>   | Indonesia              | 100 |       |
| <i>Epi-ilimaquinone</i>                | Sesquiterpene | Cytotoxic activity - Antimicrobial activity                 | <i>Hippospongia sp</i>       | Fiji island, Melanesia | 103 | Known |
| Smenospongine                          | Sesquiterpene | Cytotoxic activity                                          | <i>Hippospongia sp</i>       | Fiji island, Melanesia | 103 | Known |
|                                        |               |                                                             | <i>Spongia pertusa Esper</i> | Yongxing Island        | 99  |       |



|                                                                                                                                                          |               |                                                             |                            |                                    |     |       |
|----------------------------------------------------------------------------------------------------------------------------------------------------------|---------------|-------------------------------------------------------------|----------------------------|------------------------------------|-----|-------|
| Glycinyllimaquinone                                                                                                                                      | Sesquiterpene | Cytotoxic activity                                          | <i>Hippospongia sp</i>     | Fiji island, Melanesia             | 103 | Known |
| Hippospongide C                                                                                                                                          | Sesterterpene | Cytotoxic activity                                          | <i>Hippospongia sp.</i>    | The coast of Tai-tung, Taiwan      | 104 | New   |
| 12-Deacetyl-12-epi-scalaradial                                                                                                                           | Sesterterpene | Cytotoxic activity                                          | <i>Hippospongia sp.</i>    | The coast of Tai-tung, Taiwan      | 104 | Known |
| 12-epi-scalaradial                                                                                                                                       | Sesterterpene | Cytotoxic activity                                          | <i>Hippospongia sp.</i>    | The coast of Tai-tung, Taiwan      | 104 | Known |
| 12-Deacetyl-12,18-diepi-scalaradial                                                                                                                      | Sesterterpene | Cytotoxic activity                                          | <i>Hippospongia sp.</i>    | The coast of Tai-tung, Taiwan      | 104 | Known |
| 12,18-Diepisclaradial                                                                                                                                    | Sesterterpene | Cytotoxic activity                                          | <i>Hippospongia sp.</i>    | The coast of Tai-tung, Taiwan      | 104 | Known |
| Rhopaloic acid H                                                                                                                                         | Sesterterpene | Cytotoxic activity                                          | <i>Hippospongia sp.</i>    | The coast of Pingtung county       | 105 | New   |
| Rhopaloic acid A                                                                                                                                         | Sesterterpene | Cytotoxic activity                                          | <i>Hippospongia sp.</i>    | The coast of Pingtung county       | 105 | Known |
| Rhopaloic acid C                                                                                                                                         | Sesterterpene | Cytotoxic activity                                          | <i>Hippospongia sp.</i>    | The coast of Pingtung county       | 105 | Known |
| Heteronemin                                                                                                                                              | Sesterterpene | Cytotoxic activity                                          | <i>Hippospongia sp.</i>    | Tai-tung coast, Taiwan             | 106 | Known |
| Hippolachnin A                                                                                                                                           | Polyketide    | Antifungal activity                                         | <i>Hippospongia lachne</i> | The south China sea, Xisha Islands | 107 | New   |
| (1 <i>S</i> ,5 <i>R</i> )-8-((3 <i>E</i> ,7 <i>E</i> )-4,8,12-Trimethyltrideca-3,7,11-trien-1-yl)-9-oxa-2-azabicyclo[3.3.1]nona-3,7-diene-4-carbaldehyde | Sesterterpene | Protein tyrosine phosphatase 1B (PTP1B) inhibitory activity | <i>Hippospongia lachne</i> | The south China sea                | 108 | New   |

|                                                                                                                                                                                               |               |                                                             |                            |                                      |     |       |
|-----------------------------------------------------------------------------------------------------------------------------------------------------------------------------------------------|---------------|-------------------------------------------------------------|----------------------------|--------------------------------------|-----|-------|
| (3a <i>S</i> ,4 <i>R</i> ,7a <i>S</i> )-4-Hydroxy-2-oxo-7-((3 <i>E</i> ,7 <i>E</i> )-4,8,12-trimethyltrideca-3,7,11-trien-1-yl)-2,3,3a,4,5,7a-hexahydrobenzofuran-3a-carboxylic acid          | Sesterterpene | Protein tyrosine phosphatase 1B (PTP1B) inhibitory activity | <i>Hippospongia lachne</i> | The south China sea                  | 108 | New   |
| (3a <i>R</i> ,4 <i>R</i> ,7a <i>S</i> )-4-Hydroxy-2-oxo-7-((3 <i>E</i> ,7 <i>E</i> )-4,8,12-trimethyltrideca-3,7,11-trien-1-yl)-2,3,3a,4,5,7a-hexahydro-1 <i>H</i> -indole-3a-carboxylic acid | Sesterterpene | Protein tyrosine phosphatase 1B (PTP1B) inhibitory activity | <i>Hippospongia lachne</i> | The south China sea                  | 108 | New   |
| 2-(2-Hydroxy-5-((3 <i>E</i> ,7 <i>E</i> )-4,8,12-trimethyltrideca-3,7,11-trien-1-yl)phenyl)acetic acid                                                                                        | Sesterterpene | Protein tyrosine phosphatase 1B (PTP1B) inhibitory activity | <i>Hippospongia lachne</i> | The south China sea                  | 108 | New   |
| (2 <i>E</i> ,4 <i>E</i> ,6 <i>Z</i> )-6-(Aminomethylene)-2-((3 <i>E</i> ,7 <i>E</i> )-4,8,12-trimethyltrideca-3,7,11-trien-1-yl)hepta-2,4-dienedial                                           | Sesterterpene | Protein tyrosine phosphatase 1B (PTP1B) inhibitory activity | <i>Hippospongia lachne</i> | The south China sea                  | 108 | New   |
| (-)-Hippolide J                                                                                                                                                                               | Sesterterpene | Antifungal activity                                         | <i>Hippospongia lachne</i> | The south China sea, Yongxing Island | 109 | New   |
| (+)-Hippolide J                                                                                                                                                                               | Sesterterpene | Antifungal activity                                         | <i>Hippospongia lachne</i> | The south China sea, Yongxing Island | 109 | New   |
| Hipposponlachnin A                                                                                                                                                                            | Diterpene     | Antiallergic activity                                       | <i>Hippospongia lachne</i> | The south China sea, Xisha Islands   | 110 | New   |
| Hipposponlachnin B                                                                                                                                                                            | Diterpene     | Antiallergic activity                                       | <i>Hippospongia lachne</i> | The south China sea, Xisha Islands   | 110 | New   |
| Hyattellactone A                                                                                                                                                                              | Sesterterpene | Protein tyrosine phosphatase 1B inhibitor                   | <i>Hyattella sp.</i>       | North Sulawesi, Indonesia            | 111 | New   |
| Hyattellactone B                                                                                                                                                                              | Sesterterpene | Protein tyrosine phosphatase 1B inhibitor                   | <i>Hyattella sp.</i>       | North Sulawesi, Indonesia            | 111 | New   |
| Phyllofolactone F                                                                                                                                                                             | Sesterterpene | Protein tyrosine phosphatase 1B inhibitor                   | <i>Hyattella sp.</i>       | North Sulawesi, Indonesia            | 111 | Known |

|                                                                                                                                           |               |                                             |                                    |                           |     |       |
|-------------------------------------------------------------------------------------------------------------------------------------------|---------------|---------------------------------------------|------------------------------------|---------------------------|-----|-------|
| Phyllofolactone G                                                                                                                         | Sesterterpene | Protein tyrosine phosphatase 1B inhibitor   | <i>Hyattella sp.</i>               | North Sulawesi, Indonesia | 111 | Known |
| 2 $\alpha$ -Hydroxyspongia- 13(16),14-diene-3-one                                                                                         | Diterpene     | Cytotoxic activity                          | <i>Hyattella aff. intestinalis</i> | Iriomote Island, Okinawa  | 93  | New   |
| (3bR,5aR,6S,9aR,9bR)-6-(Hydroxymethyl)-3b,6,9a-trimethyl-4,5,5a,6,8,9,9a,9b,10,11-decahydrophenanthro[1,2-c]furan-7(3bH)-one              | Diterpene     | Cytotoxic activity                          | <i>Hyattella aff. intestinalis</i> | Iriomote Island, Okinawa  | 93  | Known |
| (3bR,5aR,7S,9aR,9bR)-7-Hydroxy-3b,6,6,9a-tetramethyl-3b,4,5,5a,6,7,9,9a,10,11-decahydrophenanthro[1,2-c]furan-8(9bH)-one                  | Diterpene     | Cytotoxic activity                          | <i>Hyattella aff. intestinalis</i> | Iriomote Island, Okinawa  | 93  | Known |
| 3 $\beta$ -Hydroxyspongia-13(16),14-diene-2-one                                                                                           | Diterpene     | Cytotoxic activity                          | <i>Hyattella aff. intestinalis</i> | Iriomote Island, Okinawa  | 93  | New   |
| 2 $\alpha$ ,3 $\alpha$ - Diacetoxy-17,19-dihydroxyspongia-13(16),14-diene                                                                 | Diterpene     | Cytotoxic activity                          | <i>Hyattella aff. intestinalis</i> | Iriomote Island, Okinawa  | 93  | New   |
| (3bS,5aR,6S,7R,8S,9aR,9bR)-3b,6-Bis(hydroxymethyl)-6,9a-dimethyl-3b,4,5,5a,6,7,8,9,9a,9b,10,11-dodecahydrophenanthro[1,2-c]furan-7,8-diol | Diterpene     | Cytotoxic activity                          | <i>Hyattella aff. intestinalis</i> | Iriomote Island, Okinawa  | 93  | Known |
| Suvanine N,N-dimethylguanidium salt                                                                                                       | Sesterterpene | Cytotoxic activity                          | <i>Coscinoderma sp.</i>            | Chuuk Island, Micronesia  | 112 | Known |
| N,N-Dimethyl-1,3- dimethylherbipoline salt                                                                                                | Sesterterpene | Cytotoxic activity - antibacterial activity | <i>Coscinoderma sp.</i>            | Chuuk Island, Micronesia` | 112 | New   |
| Coscinolactam A                                                                                                                           | Sesterterpene | Cytotoxic activity                          | <i>Coscinoderma sp.</i>            | Chuuk Island, Micronesia  | 112 | Known |

|                                                                                           |                        |                        |                         |                          |     |       |
|-------------------------------------------------------------------------------------------|------------------------|------------------------|-------------------------|--------------------------|-----|-------|
| Coscinolactam C                                                                           | Sesterterpene          | Cytotoxic activity     | <i>Coscinoderma sp.</i> | Chuuk Island, Micronesia | 112 | New   |
| Coscinolactam D                                                                           | Sesterterpene          | Cytotoxic activity     | <i>Coscinoderma sp.</i> | Chuuk Island, Micronesia | 112 | New   |
| Coscinolactam E                                                                           | Sesterterpene          | Cytotoxic activity     | <i>Coscinoderma sp.</i> | Chuuk Island, Micronesia | 112 | New   |
| Coscinolactam F                                                                           | Sesterterpene          | Cytotoxic activity     | <i>Coscinoderma sp.</i> | Chuuk Island, Micronesia | 112 | New   |
| Coscinolactam G                                                                           | Sesterterpene          | Cytotoxic activity     | <i>Coscinoderma sp.</i> | Chuuk Island, Micronesia | 112 | New   |
| Deacyl irciniasulfonic acid C                                                             | Miscellaneous compound | NA                     | <i>Coscinoderma sp.</i> | Chuuk Island, Micronesia | 112 | New   |
| Sodium deacyl irciniasulfonate D                                                          | Miscellaneous compound | NA                     | <i>Coscinoderma sp.</i> | Chuuk Island, Micronesia | 112 | New   |
| <b>D- Family: Irciniidae</b>                                                              |                        |                        |                         |                          |     |       |
| 4-(2-((S)-2,2-Dimethyl-6-methylenecyclohexyl)ethyl)-5-hydroxyfuran-2(5H)-one              | Sesquiterpene          | PPAR $\delta$ activity | <i>Ircinia sp.</i>      | Korea                    | 113 | Known |
| (S)-4-(2-(2,2-Dimethyl-6-methylenecyclohexyl)ethyl)-1-isopentyl-1H-pyrrol-2(5H)-one       | Meroterpene            | PPAR $\delta$ activity | <i>Ircinia sp.</i>      | Korea                    | 113 | New   |
| 4-(2-((S)-2,2-Dimethyl-6-methylenecyclohexyl)ethyl)-1-(2-methylbutyl)-1H-pyrrol-2(5H)-one | Meroterpene            | PPAR $\delta$ activity | <i>Ircinia sp.</i>      | Korea                    | 113 | New   |
| (S)-4-(2-(2,2-Dimethyl-6-methylenecyclohexyl)ethyl)-1-phenethyl-1H-pyrrol-2(5H)-one       | Meroterpene            | PPAR $\delta$ activity | <i>Ircinia sp.</i>      | Korea                    | 113 | New   |

|                                                                                                                                                                                |                                          |                                     |                    |                               |     |       |
|--------------------------------------------------------------------------------------------------------------------------------------------------------------------------------|------------------------------------------|-------------------------------------|--------------------|-------------------------------|-----|-------|
| (S)-3-(2-(2,2-Dimethyl-6-methylenecyclohexyl)ethyl)-1-phenethyl-1H-pyrrol-2(5H)-one                                                                                            | Meroterpene                              | PPAR $\delta$ activity (not active) | <i>Ircinia sp.</i> | Korea                         | 113 | New   |
| 3-(2-((S)-2,2-Dimethyl-6-methylenecyclohexyl)ethyl)-5-hydroxyfuran-2(5H)-one                                                                                                   | Sesquiterpene                            | PPAR $\delta$ activity (not active) | <i>Ircinia sp.</i> | Korea                         | 113 | Known |
| (4aR,6S,8aS)-4a,6-Dihydroxy-2-((1R,2R,3R)-2-(2-hydroxyethyl)-2-methyl-3-((R)-6-methylheptan-2-yl)cyclopentyl)-8a-methyl-4a,5,6,7,8,8a-hexahydronaphthalene-1,4-dione           | Secosterol                               | Antibacterial                       | <i>Ircinia sp.</i> | Yeongdeok-gun in the East Sea | 114 | New   |
| 5-Hydroxy-1Hindole-3-carboxylic acid ethyl ester                                                                                                                               | Nitrogenous compound (Indole derivative) | NA                                  | <i>Ircinia sp.</i> | Iriomote Island               | 115 | New   |
| 5-Hydroxy-1Hindole-3-glyoxylate ethyl ester                                                                                                                                    | Nitrogenous compound (Indole derivative) | NA                                  | <i>Ircinia sp.</i> | Iriomote Island               | 115 | New   |
| Dragmacidonamine B                                                                                                                                                             | Nitrogenous compound (Indole derivative) | NA                                  | <i>Ircinia sp.</i> | Iriomote Island               | 115 | Known |
| Gesashidine A                                                                                                                                                                  | Nitrogenous compound (Indole derivative) | NA                                  | <i>Ircinia sp.</i> | Iriomote Island               | 115 | Known |
| Hyrtilsulawesine                                                                                                                                                               | Nitrogenous compound (Indole derivative) | NA                                  | <i>Ircinia sp.</i> | Iriomote Island               | 115 | Known |
| Hyrtiomanzamine                                                                                                                                                                | Nitrogenous compound (Indole derivative) | NA                                  | <i>Ircinia sp.</i> | Iriomote Island               | 115 | Known |
| Hyrtimomine D                                                                                                                                                                  | Nitrogenous compound (Indole derivative) | NA                                  | <i>Ircinia sp.</i> | Iriomote Island               | 115 | Known |
| Hyrtilosine A                                                                                                                                                                  | Nitrogenous compound (Indole derivative) | NA                                  | <i>Ircinia sp.</i> | Iriomote Island               | 115 | Known |
| 5-Hydroxy-1H-indole-3-carbaldehyde                                                                                                                                             | Nitrogenous compound (Indole derivative) | NA                                  | <i>Ircinia sp.</i> | Iriomote Island               | 115 | Known |
| (4aR,6S,8aS)-2-((1R,2R,3R)-3-((2R,Z)-5,6-Dimethylhept-3-en-2-yl)-2-(2-hydroxyethyl)-2-methylcyclopentyl)-4a,6-dihydroxy-8a-methyl-4a,5,6,7,8,8a-hexahydronaphthalene-1,4-dione | Secosterol                               | Antibacterial                       | <i>Ircinia sp.</i> | Yeongdeok-gun in the East Sea | 116 | New   |

|                                     |               |                                                 |                      |                                  |     |       |
|-------------------------------------|---------------|-------------------------------------------------|----------------------|----------------------------------|-----|-------|
| (7E, 12E, 20Z, 18S)-Variabilin      | Sesterterpene | Protein tyrosine phosphatase (PTP) 1B inhibitor | <i>Ircinia sp.</i>   | Manado, Indonesia                | 96  | Known |
| (12E, 20Z, 18S)-8-Hydroxyvariabilin | Sesterterpene | Protein tyrosine phosphatase (PTP) 1B inhibitor | <i>Ircinia sp.</i>   | Manado, Indonesia                | 96  | Known |
| Felixin A                           | Sesterterpene | Cytotoxic activity                              | <i>Ircinia felix</i> | The coast of the Southern Taiwan | 117 | New   |
| Felixin B                           | Sesterterpene | Cytotoxic activity                              | <i>Ircinia felix</i> | The coast of the Southern Taiwan | 117 | New   |
| Felixin C                           | Sesterterpene | Cytotoxic activity                              | <i>Ircinia felix</i> | The coast of the Southern Taiwan | 117 | New   |
| Felixin D                           | Sesterterpene | Cytotoxic activity                              | <i>Ircinia felix</i> | The coast of the Southern Taiwan | 117 | New   |
| Felixin E                           | Sesterterpene | Cytotoxic activity                              | <i>Ircinia felix</i> | The coast of the Southern Taiwan | 117 | New   |
| Felixin F                           | Sesterterpene | Cytotoxic activity                              | <i>Ircinia felix</i> | The coast of the Southern Taiwan | 118 | New   |
| Felixin G                           | Sesterterpene | Cytotoxic activity                              | <i>Ircinia felix</i> | The coast of the Southern Taiwan | 118 | New   |
| Ircinialactam E                     | Sesterterpene | Antiprotozoal activity                          | <i>Ircinia oros</i>  | Northern Aegean Sea, Turkey      | 119 | New   |

|                                                                        |               |                        |                         |                                   |     |       |
|------------------------------------------------------------------------|---------------|------------------------|-------------------------|-----------------------------------|-----|-------|
| Ircinialactam F                                                        | Sesterterpene | Antiprotozoal activity | <i>Ircinia oros</i>     | Northern Aegean Sea, Turkey       | 119 | New   |
| (7E,12E,20Z,18β)-Variabilin                                            | Sesterterpene | NA                     | <i>Ircinia echinata</i> | Coto Island, Quangninh, Vietnam   | 120 | Known |
| (12E,20Z,18β)-8-Hydroxyvariabilin                                      | Sesterterpene | NA                     | <i>Ircinia echinata</i> | Coto Island, Quangninh, Vietnam   | 120 | Known |
| (7E,11E,3β)-3,7,11-Trimethyl-14-(furan-3-yl)tetradec-7,11-dienoic acid | Sesterterpene | NA                     | <i>Ircinia echinata</i> | Coto Island, Quangninh, Vietnam   | 120 | Known |
| Furoscarolol                                                           | Sesterterpene | NA                     | <i>Ircinia echinata</i> | Coto Island, Quangninh, Vietnam   | 120 | Known |
| 3β-Hydroxycholest-5-en-7-one                                           | Sterol        | NA                     | <i>Ircinia echinata</i> | Coto Island, Quangninh, Vietnam   | 120 | Known |
| 5,6-Epoxycholesta-7,22(E)-dien-3,9-diol                                | Epoxysterol   | NA                     | <i>Ircinia echinata</i> | Bai Tu Long (Quang Ninh, Vietnam) | 121 | New   |

|                                                  |               |                    |                         |                                   |     |       |
|--------------------------------------------------|---------------|--------------------|-------------------------|-----------------------------------|-----|-------|
| 5,6-Epoxycholesta-7,24(28)-dien-3,9-diol         | Epoxysterol   | NA                 | <i>Ircinia echinata</i> | Bai Tu Long (Quang Ninh, Vietnam) | 121 | New   |
| (24R)-5,6-Epoxy-24-ethyl-cholesta-7-en-3,9-diol  | Epoxysterol   | Cytotoxic activity | <i>Ircinia echinata</i> | Bai Tu Long (Quang Ninh, Vietnam) | 121 | New   |
| 5,6-Epoxycholesta-7-en-3,9-diol                  | Epoxysterol   | Cytotoxic activity | <i>Ircinia echinata</i> | Bai Tu Long (Quang Ninh, Vietnam) | 121 | New   |
| (24S)-5,6-Epoxyergosta-7,22-dien-3,9-diol        | Epoxysterol   | NA                 | <i>Ircinia echinata</i> | Bai Tu Long (Quang Ninh, Vietnam) | 121 | New   |
| (24R)-5,6-Epoxy-24-methyl-cholesta-7-en-3,9-diol | Epoxysterol   | NA                 | <i>Ircinia echinata</i> | Bai Tu Long (Quang Ninh, Vietnam) | 121 | New   |
| 5,6-Epoxystigmasta-7-en-3-ol                     | Epoxysterol   | NA                 | <i>Ircinia echinata</i> | Bai Tu Long (Quang Ninh, Vietnam) | 121 | Known |
| 5,6-Epoxystigmasta-7,22-dien-3-ol                | Epoxysterol   | NA                 | <i>Ircinia echinata</i> | Bai Tu Long (Quang Ninh, Vietnam) | 121 | Known |
| 5,6-Epoxyergosta-7-en-3-ol                       | Epoxysterol   | NA                 | <i>Ircinia echinata</i> | Bai Tu Long (Quang Ninh, Vietnam) | 121 | Known |
| Sarcotragin C                                    | Sesterterpene | Cytotoxic activity | <i>Sarcotragus sp.</i>  | Chuja Island, Korea               | 122 | New   |



|                                                                                                                               |               |                        |                                 |                             |     |       |
|-------------------------------------------------------------------------------------------------------------------------------|---------------|------------------------|---------------------------------|-----------------------------|-----|-------|
| Ircinin 1                                                                                                                     | Sesterterpene | Anticancer Activity    | <i>Sarcotragus spinosulus</i>   | Tabarka, Tunisia -          | 123 | Known |
|                                                                                                                               |               | Anticancer Activity    | <i>Psammocinia sp.</i>          | North Sulawesi, Indonesia   | 124 |       |
|                                                                                                                               |               | Antiprotozoal activity | <i>Ircinia oros</i>             | Northern Aegean Sea, Turkey | 119 |       |
| Sarcotin A                                                                                                                    | Sesterterpene | Anticancer Activity.   | <i>Sarcotragus fasciculatus</i> | Monastir, Tunisia           | 123 | Known |
| Variabilin                                                                                                                    | Sesterterpene | Anticancer Activity.   | <i>Sarcotragus fasciculatus</i> | Monastir, Tunisia           | 123 | Known |
| 2-((2E,6E,10E,14E,18E,22E)-3,7,11,15,19,23,27-Heptamethyloctacos-2,6,10,14,18,22,26-heptaen-1-yl)benzene-1,4-diol             | Polyketide    | Anticancer Activity.   | <i>Sarcotragus spinosulus</i>   | Monastir, Tunisia           | 123 | Known |
| 2-((2E,6E,10E,14E,18E,22E,26E)-3,7,11,15,19,23,27,31-Octamethyldotriaconta-2,6,10,14,18,22,26,30-octaen-1-yl)benzene-1,4-diol | Polyketide    | Anticancer Activity.   | <i>Sarcotragus spinosulus</i>   | Tabarka, Tunisia            | 123 | Known |
| 2'-[38-Hydroxy]nonaprenyl-1',4'-hydroquinone                                                                                  | Polyketide    | Anticancer Activity.   | <i>Sarcotragus foetidus</i>     | Bizerte, Tunisia            | 123 | Known |
| 12-Deacetoxy-23-hydroxyscalaradial                                                                                            | Sesterterpene | Cytotoxic activity     | <i>Psammocinia sp.</i>          | The South Sea of Korea      | 125 | New   |
| 12-Dehydroxy- 23-hydroxyhyrtiolide                                                                                            | Sesterterpene | Cytotoxic activity     | <i>Psammocinia sp.</i>          | The South Sea of Korea      | 125 | New   |
| 12-O-Acetyl-16-deacetoxy-23-acetoxyscalarafuran                                                                               | Sesterterpene | Cytotoxic activity     | <i>Psammocinia sp.</i>          | The South Sea of Korea      | 125 | New   |
| 12-Deacetoxy-23-hydroxyheteronemin                                                                                            | Sesterterpene | Cytotoxic activity     | <i>Psammocinia sp.</i>          | The South Sea of Korea      | 125 | Known |
| 12-Deacetoxy-23-acetoxy-19-O-acetylscalarin                                                                                   | Sesterterpene | Cytotoxic activity     | <i>Psammocinia sp.</i>          | The South Sea of Korea      | 125 | Known |
| 12-Deacetoxy-23-O-acetoxysteronemin                                                                                           | Sesterterpene | Cytotoxic activity     | <i>Psammocinia sp.</i>          | The South Sea of Korea      | 125 | Known |
| 12-Deacetoxyscalaradial                                                                                                       | Sesterterpene | Cytotoxic activity     | <i>Psammocinia sp.</i>          | The South Sea of Korea      | 125 | Known |

|                                 |               |                                                                                        |                        |                    |     |       |
|---------------------------------|---------------|----------------------------------------------------------------------------------------|------------------------|--------------------|-----|-------|
| (-)-Ircinianin                  | Sesterterpene | Modulation of glycine-gated chloride channel receptors (GlyRs) (modest potentiator)    | <i>Psammocinia sp.</i> | Southern Australia | 126 | Known |
| (-)-Ircinianin sulfate          | Sesterterpene | Modulation of glycine-gated chloride channel receptors (GlyRs) (modest antagonist)     | <i>Psammocinia sp.</i> | Southern Australia | 126 | Known |
| (-)-Ircinianin lactam A         | Sesterterpene | Modulation of glycine-gated chloride channel receptors (GlyRs) (no significant effect) | <i>Psammocinia sp.</i> | Southern Australia | 126 | New   |
| (-)-Ircinianin lactam A sulfate | Sesterterpene | Modulation of glycine-gated chloride channel receptors (GlyRs) (modest potentiator)    | <i>Psammocinia sp.</i> | Southern Australia | 126 | New   |
| (-)-Oxoircinianin               | Sesterterpene | Modulation of glycine-gated chloride channel receptors (GlyRs) (no significant effect) | <i>Psammocinia sp.</i> | Southern Australia | 126 | New   |

|                            |               |                                                                                                            |                        |                             |     |       |
|----------------------------|---------------|------------------------------------------------------------------------------------------------------------|------------------------|-----------------------------|-----|-------|
| (-)-Oxoircinianin lactam A | Sesterterpene | Modulation of glycine-gated chloride channel receptors (GlyRs) (selective potentiator of $\alpha$ 1 GlyRs) | <i>Psammocinia sp.</i> | Southern Australia          | 126 | New   |
| (-)-Icinianin lactone A    | Sesterterpene | Modulation of glycine-gated chloride channel receptors (GlyRs) (no significant effect)                     | <i>Psammocinia sp.</i> | Southern Australia          | 126 | New   |
| Sulawesin A                | Sesterterpene | Anticancer Activity.                                                                                       | <i>Psammocinia sp.</i> | North Sulawesi, Indonesia   | 124 | New   |
| Sulawesin B                | Sesterterpene | Anticancer Activity.                                                                                       | <i>Psammocinia sp.</i> | North Sulawesi, Indonesia   | 124 | New   |
| Sulawesin C                | Sesterterpene | Anticancer Activity.                                                                                       | <i>Psammocinia sp.</i> | North Sulawesi, Indonesia   | 124 | New   |
| Ircinin 2                  | Sesterterpene | Anticancer Activity                                                                                        | <i>Psammocinia sp.</i> | North Sulawesi, Indonesia   | 124 | Known |
|                            |               | Antiprotozoal activity                                                                                     | <i>Ircinia oros</i>    | Northern Aegean Sea, Turkey | 119 |       |

| E- Artifacts from order Dictyoceratida:                          |                      |                                                              |                                |                                   |    |          |
|------------------------------------------------------------------|----------------------|--------------------------------------------------------------|--------------------------------|-----------------------------------|----|----------|
| $\alpha$ 16- Methoxyfuroscalarol                                 | Sesterterpene        | Cytotoxic activity                                           | <i>Scalarispongia sp.</i>      | Dokdo (island), Republic of Korea | 37 | Artifact |
| $\beta$ 16- Methoxyfuroscalarol                                  | Sesterterpene        | Cytotoxic activity                                           | <i>Scalarispongia sp.</i>      | Dokdo (island), Republic of Korea | 37 | Artifact |
| 20-Demethoxy-20-ethoxydactyloquinone E                           | Sesquiterpene        | Cytotoxic activity                                           | <i>Spongia pertusa Esper</i>   | Yongxing Island                   | 99 | Artifact |
| 20-Demethoxy-20-ethoxydactyloquinone B                           | Sesquiterpene        | Cytotoxic activity                                           | <i>Spongia pertusa Esper</i>   | Yongxing Island                   | 99 | Artifact |
| 20-Demethoxy-20-ethoxycyclosporgiaquinone-1                      | Sesquiterpene        | Cytotoxic activity                                           | <i>Spongia pertusa Esper</i>   | Yongxing Island                   | 99 | Artifact |
| 3,5-Dibromo-2-(30,50-dibromo-20-methoxyphenoxy)-1-methoxybenzene | Halogenated compound | Inhibit Protein tyrosine phosphatase 1B activity             | <i>Lamellodysidea herbacea</i> | Manado, Indonesia                 | 89 | Prepared |
| 3,5-Dibromo-2-(30,50-dibromo-20-methoxyphenoxy)phenyl ethanoate  | Halogenated compound | Inhibit Protein tyrosine phosphatase 1B activity - cytotoxic | <i>Lamellodysidea herbacea</i> | Manado, Indonesia                 | 89 | Prepared |
| 3,5-Dibromo-2-(30,50-dibromo-20-methoxyphenoxy)phenyl butanoate  | Halogenated compound | Inhibit Protein tyrosine phosphatase 1B activity - cytotoxic | <i>Lamellodysidea herbacea</i> | Manado, Indonesia                 | 89 | Prepared |
| 3,5-Dibromo-2-(30,50-dibromo-20-methoxyphenoxy)phenyl hexanoate  | Halogenated compound | Inhibit Protein tyrosine phosphatase 1B activity - cytotoxic | <i>Lamellodysidea herbacea</i> | Manado, Indonesia                 | 89 | Prepared |
| 3,5-Dibromo-2-(30,50-dibromo-20-methoxyphenoxy)phenyl benzoate   | Halogenated compound | Inhibit Protein tyrosine phosphatase 1B activity - cytotoxic | <i>Lamellodysidea herbacea</i> | Manado, Indonesia                 | 89 | Prepared |

|                                                                                                         |               |                                                                                        |                             |                    |     |                               |
|---------------------------------------------------------------------------------------------------------|---------------|----------------------------------------------------------------------------------------|-----------------------------|--------------------|-----|-------------------------------|
| (-)-Ircinianin acetate                                                                                  | Sesterterpene | Modulation of glycine-gated chloride channel receptors (GlyRs) (no significant effect) | <i>Psammocinia sp.</i>      | Southern Australia | 126 | Acetylation of (-)-ircinianin |
| (2R,3R,4S,5R)-3-(2-((S)-2,2-Dimethyl-6-methylenecyclohexyl)ethyl)-2,5-dimethoxytetrahydrofuran-3,4-diol | Terpene       | PPAR $\delta$ agonistic activity                                                       | <i>Ircinia sp.</i>          | Korea              | 113 | artifact                      |
| (2R,4S,5R)-3-(2-((S)-2,2-Dimethyl-6-methylenecyclohexyl)ethyl)-2,5-dimethoxytetrahydrofuran-3,4-diol    | Terpene       | PPAR $\delta$ agonistic activity                                                       | <i>Ircinia sp.</i>          | Korea              | 113 | artifact                      |
| Salarin A                                                                                               | Macrolide     | Cytotoxic activity                                                                     | <i>Fascaplysinopsis sp.</i> | Madagascar         | 127 | New                           |
| Salarin C                                                                                               | Macrolide     | Cytotoxic activity                                                                     | <i>Fascaplysinopsis sp.</i> | Madagascar         | 127 | New                           |
| Tulearin A                                                                                              | Macrolide     | Cytotoxic activity                                                                     | <i>Fascaplysinopsis sp.</i> | Madagascar         | 127 | New                           |

## References:

1. D. Youssef, L. Shaala and H. Asfour, Bioactive compounds from the Red Sea marine sponge Hyrtios species, *Mar. Drugs*, 2013, 11, 1061-1070.22
2. R. Momose, N. Tanaka, J. Fromont and J. i. Kobayashi, Hyrtimomines A–C, New Heteroaromatic Alkaloids from a Sponge Hyrtios sp, *Organic Lett.*, 2013, 15, 2010-2013.
3. N. Tanaka, R. Momose, Y. Takahashi, T. Kubota, A. Takahashi-Nakaguchi, T. Gonoï, J. Fromont and J. i. Kobayashi, Hyrtimomines D and E, bisindole alkaloids from a marine sponge Hyrtios sp, *Tetrahedron Lett.*, 2013, 54, 4038-4040.
4. N. Tanaka, R. Momose, A. Takahashi-Nakaguchi, T. Gonoï, J. Fromont and J. i. Kobayashi, Hyrtimomines, indole alkaloids from Okinawan marine sponges Hyrtios spp, *Tetrahedron*, 2014, 70, 832-837.
5. F. Yang, J. H. Gan, X. Y. Liu and H. W. Lin, Scalarane sesterterpenes from the Paracel Islands marine sponge Hyrtios sp, *Nat. Prod. Commun.*, 2014, 9, 763-764.
6. C. Festa, C. Cassiano, M. V. D'Auria, C. Debitus, M. C. Monti and S. De Marino, Scalarane sesterterpenes from Thorectidae sponges as inhibitors of TDP-43 nuclear factor, *Org. Biomol. Chem.*, 2014, 12, 8646-8655.
7. W. Kawetripob, C. Mahidol, P. Tuntiwachwuttikul, S. Ruchirawat and H. Prawat, Cytotoxic Sesterterpenes from Thai Marine Sponge Hyrtios erectus, *Mar. Drugs*, 2018, 16, 1-15.
8. W. M. Alarif, S. S. Al-Lihaibi, M. A. Ghandourah, M. I. Orif, S. A. Basaif and S.-E. N. Ayyad, Cytotoxic scalarane-type sesterterpenes from the Saudi Red Sea sponge Hyrtios erectus, *J. Asian Nat. Prod. Res.*, 2016, 18, 611-617.
9. A. Alahdal, H. Asfour, S. Ahmed, A. Noor, A. Al-Abd, M. Elfaky and S. Elhady, Anti-helicobacter, antitubercular and cytotoxic activities of scalaranes from the red sea sponge hyrtios erectus, *Molecules*, 2018, 23, 1-11.
10. S.-Y. Wu, P.-J. Sung, Y.-L. Chang, S.-L. Pan and C.-M. Teng, Heteronemin, a spongean sesterterpene, induces cell apoptosis and autophagy in human renal carcinoma cells, *Biomed. Res. Int.*, 2015, 2015, 1-13.
11. S. Elhady, A. Al-Abd, A. El-Halawany, A. Alahdal, H. Hassanean and S. Ahmed, Antiproliferative scalarane-based metabolites from the Red Sea sponge Hyrtios erectus, *Mar. Drugs*, 2016, 14, 1-14.

12. S. Elhady, A. El-Halawany, A. Alahdal, H. Hassanean and S. Ahmed, A new bioactive metabolite isolated from the Red Sea marine sponge *Hyrtios erectus*, *Molecules*, 2016, 21, 1-9.
13. T. Kubota, K. Nakamura, K. Sakai, J. Fromont, T. Gonoï and J. i. Kobayashi, Hyrtinadines C and D, New Azepinoindole-Type Alkaloids from a Marine Sponge *Hyrtios* sp, *Chem. Pharm. Bull.*, 2016, 64, 975-978.
14. J. Wang, F.-R. Mu, W.-H. Jiao, J. Huang, L.-L. Hong, F. Yang, Y. Xu, S.-P. Wang, F. Sun and H.-W. Lin, Meroterpenoids with protein tyrosine phosphatase 1B inhibitory activity from a *Hyrtios* sp. marine sponge, *J. Nat. Prod.*, 2017, 80, 2509-2514.
15. T. S. Hilliard, G. Miklossy, C. Chock, P. Yue, P. Williams and J. Turkson, 15 $\alpha$ -Methoxypuuphenol induces antitumor effects in vitro and in vivo against human glioblastoma and breast cancer models, *Mol. Cancer Ther.*, 2017, 16, 601-613.
16. N. H. Shady, M. A. Fouad, S. Ahmed, S. M. Pimentel-Elardo, J. R. Nodwell, M. S. Kamel and U. R. Abdelmohsen, A new antitrypanosomal alkaloid from the Red Sea marine sponge *Hyrtios* sp, *J. Antibiot.*, 2018, 71, 1036-1039.
17. J. Li, L. Du, M. Kelly, Y.-D. Zhou and D. G. Nagle, Structures and potential antitumor activity of sesterterpenes from the marine sponge *Hyrtios communis*, *J. Nat. Prod.*, 2013, 76, 1492-1497.
18. W.-F. He, D.-Q. Xue, L.-G. Yao, J.-Y. Li, J. Li and Y.-W. Guo, Hainan erectamines A-C, alkaloids from the Hainan sponge *Hyrtios erecta*, *Mar. Drugs*, 2014, 12, 3982-3993.
19. E. Ju, A. Latif, C.-S. Kong, Y. Seo, Y.-J. Lee, S. R. Dalal, M. B. Cassera and D. G. Kingston, Antimalarial activity of the isolates from the marine sponge *Hyrtios erectus* against the chloroquine-resistant Dd2 strain of *Plasmodium falciparum*, *Z Naturforsch C*, 2018, 73, 397-400.
20. M. S. Majik, D. Shirodkar, C. Rodrigues, L. D'Souza and S. Tilvi, Evaluation of single and joint effect of metabolites isolated from marine sponges, *Fasciospongia cavernosa* and *Axinella donnani* on antimicrobial properties, *Bioorg. Med. Chem. Lett.*, 2014, 24, 2863-2866.
21. E. Sakai, H. Kato, H. Rotinsulu, F. Losung, R. E. Mangindaan, N. J. de Voogd, H. Yokosawa and S. Tsukamoto, Variabines A and B: New  $\beta$ -carboline alkaloids from the marine sponge *Luffariella variabilis*, *J. Nat. Med.*, 2014, 68, 215-219.
22. U. W. Hawas, L. T. Abou El-Kassem, M. S. Abdelfattah, M. I. Elmallah, M. A. G. Eid, M. M. Monier and N. Marimuthu, Cytotoxic activity of alkyl benzoate and fatty acids from the red sea sponge *Hyrtios erectus*, *Nat. Prod. Res.*, 2018, 32, 1369-1374.
23. H. Wahab, N. Pham, T. Muhammad, J. Hooper and R. Quinn, Merosesquiterpene congeners from the Australian Sponge *Hyrtios digitatus* as potential drug leads for atherosclerosis disease, *Mar. Drugs*, 2017, 15, 1-10.
24. R. Teta, E. Irollo, G. Della Sala, G. Pirozzi, A. Mangoni and V. Costantino, Smenamides A and B, chlorinated peptide/polyketide hybrids containing a dolapyrrolidinone unit from the Caribbean sponge *Smenospongia aurea*. Evaluation of their role as leads in antitumor drug research, *Mar. Drugs*, 2013, 11, 4451-4463.
25. G. Esposito, G. Della Sala, R. Teta, A. Caso, M. L. Bourguet-Kondracki, J. R. Pawlik, A. Mangoni and V. Costantino, Chlorinated Thiazole-Containing Polyketide-Peptides from the Caribbean Sponge *Smenospongia conulosa*: Structure Elucidation on Microgram Scale, *Eur. J. Org. Chem.*, 2016, 2016, 2871-2875.
26. I. H. Hwang, J. Oh, A. Kochanowska-Karamyan, R. J. Doerksen, M. Na and M. T. Hamann, A novel natural phenyl alkene with cytotoxic activity, *Tetrahedron Lett.*, 2013, 54, 3872-3876.
27. G. Esposito, R. Teta, R. Miceli, L. Ceccarelli, G. Della Sala, R. Camerlingo, E. Irollo, A. Mangoni, G. Pirozzi and V. Costantino, Isolation and assessment of the in vitro anti-tumor activity of smenothiazole A and B, chlorinated thiazole-containing peptide/polyketides from the Caribbean sponge, *Smenospongia aurea*, *Mar. Drugs*, 2015, 13, 444-459.
28. I. H. Hwang, J. Oh, W. Zhou, S. Park, J.-H. Kim, A. G. Chittiboyina, D. Ferreira, G. Y. Song, S. Oh and M. Na, Cytotoxic activity of rearranged drimane meroterpenoids against colon cancer cells via down-regulation of  $\beta$ -catenin expression, *J. Nat. Prod.*, 2015, 78, 453-461.
29. G. Esposito, R. Teta, G. Della Sala, J. Pawlik, A. Mangoni and V. Costantino, Isolation of smenopyrone, a Bis- $\gamma$ -pyrone polypropionate from the Caribbean sponge *Smenospongia aurea*, *Mar. Drugs*, 2018, 16, 1-9.
30. R. Teta, G. Della Sala, G. Esposito, C. W. Via, C. Mazzoccoli, C. Piccoli, M. J. Bertin, V. Costantino and A. Mangoni, A joint molecular networking study of a *Smenospongia* sponge and a cyanobacterial bloom revealed new antiproliferative chlorinated polyketides, *Org. Chem. Front.*, 2019, 6, 1762-1774.
31. T. H. Le, D. T. T. Hang, N. X. Nhiem, P. H. Yen, H. L. T. Anh, T. H. Quang, B. H. Tai, N. Van Dau and P. Van Kiem, Naphtoquinones and sesquiterpene cyclopentenones from the sponge *Smenospongia cerebriformis* with their cytotoxic activity, *Chem. Pharm. Bull.*, 2017, 65, 589-592.
32. P. Van Kiem, D. T. Hang, N. X. Nhiem, B. H. Tai, H. L. T. Anh, P. Van Cuong, T. H. Quang, C. Van Minh, N. Van Dau and Y.-A. Kim, Sesquiterpene derivatives from marine sponge *Smenospongia cerebriformis* and their anti-inflammatory activity, *Bioorg. Med. Chem. Lett.*, 2017, 27, 1525-1529.
33. L. T. Huyen, D. T. Hang, N. X. Nhiem, B. H. Tai, H. L. T. Anh, T. H. Quang, P. H. Yen, C. Van Minh, N. Van Dau and P. Van Kiem, Sesquiterpene quinones and diterpenes from *Smenospongia cerebriformis* and their cytotoxic activity, *Nat. Prod. Commun.*, 2017, 12, 477-478.
34. Z.-B. Zhao, J.-Z. Sun, S.-C. Mao and Y.-W. Guo, Fasciospyrinadine, a novel sesquiterpene pyridine alkaloid from a Guangxi sponge *Fasciospongia* sp, *J. Asian Nat. Prod. Res.*, 2013, 15, 198-202.

35. Y. J. Lee, D. G. Lee, H. S. Rho, V. B. Krasokhin, H. J. Shin, J. S. Lee and H. S. Lee, Cytotoxic 5-Hydroxyindole Alkaloids from the Marine Sponge *Scalarispongia* sp, *J. Heterocycl.Chem.*, 2013, 50, 1400-1404.
36. Y.-J. Lee, J.-W. Lee, D.-G. Lee, H.-S. Lee, J. Kang and J. Yun, Cytotoxic sesterterpenoids isolated from the marine sponge *Scalarispongia* sp, *Int. J. Mol. Sci.*, 2014, 15, 20045-20053.
37. Y.-J. Lee, S. H. Kim, H. Choi, H.-S. Lee, J. S. Lee, H. J. Shin and J. Lee, Cytotoxic Furan-and Pyrrole-Containing Scalarane Sesterterpenoids Isolated from the Sponge *Scalarispongia* sp, *Molecules*, 2019, 24, 1-9.
38. J. G. Starkus, P. Poerzgen, K. Layugan, K. G. Kawabata, J.-I. Goto, S. Suzuki, G. Myers, M. Kelly, R. Penner and A. Fleig, Scalaradiol is a potent inhibitor of transient receptor potential melastatin 2 (TRPM2) ion channels, *J. Nat. Prod.*, 2017, 80, 2741-2750.
39. S. Khushi, L. Nahar, A. Salim and R. Capon, Cacolid: Sesterterpene Butenolides from a Southern Australian Marine Sponge, *Cacospongia* sp, *Mar. Drugs*, 2018, 16, 1-17.
40. X. Zhang, P.-L. Li, G.-F. Qin, S. Li, N. de Voogd, X.-L. Tang and G.-Q. Li, Isolation and Absolute Configurations of Diversiform C17, C21 and C25 Terpenoids from the Marine Sponge *Cacospongia* sp, *Mar. Drugs*, 2019, 17, 1-14.
41. T. Taufa, A. J. Singh, C. R. Harland, V. Patel, B. Jones, T. i. Halafihi, J. H. Miller, R. A. Keyzers and P. T. Northcote, Zampanolides B–E from the Marine Sponge *Cacospongia mycofijiensis*: Potent Cytotoxic Macrolides with Microtubule-Stabilizing Activity, *J. Nat. Prod.*, 2018, 81, 2539-2544.
42. A. D. Przeslak, M. Inman, W. Lewis and C. J. Moody, Origin of the Thiopyrone CTP-431 “Unexpectedly” Isolated from the Marine Sponge *Cacospongia mycofijiensis*, *J. Org. Chem.*, 2018, 83, 10595-10601.
43. M. H. Hassan, M. E. Rateb, M. Hetta, T. A. Abdelaziz, M. A. Sleim, M. Jaspars and R. Mohammed, Scalarane sesterterpenes from the Egyptian Red Sea sponge *Phyllospongia lamellosa*, *Tetrahedron*, 2015, 71, 577-583.
44. S. Sun, C. Canning, K. Wang, W. Zhu, F. Yang, Y. Zhang and K. Zhou, Antibacterial Activity of 2-(3',5'-Dibromo-2'-methoxyphenoxy)-3,5- dibromophenol Isolated from *Phyllospongia papyracea*, *Nat. Prod. Commun.*, 2017, 12, 567-569.
45. H. Zhang, P. Crews, K. Tenney and F. A. Valeriote, Cytotoxic phyllactone analogs from the marine sponge *Phyllospongia papyracea*, *Med. Chem.*, 2017, 13, 295-300.
46. L. Harinantenaina, P. J. Brodie, J. Maharavo, G. Bakary, K. TenDyke, Y. Shen and D. G. Kingston, Antiproliferative homoscalarane sesterterpenes from two Madagascan sponges, *Bioorg. Med. Chem.*, 2013, 21, 2912-2917.
47. F. Cao, Z.-H. Wu, C.-L. Shao, S. Pang, X.-Y. Liang, N. J. de Voogd and C.-Y. Wang, Cytotoxic scalarane sesterterpenoids from the South China Sea sponge *Carteriospongia foliascens*, *Org. Biomol. Chem.*, 2015, 13, 4016-4024.
48. K.-H. Lai, Y.-C. Liu, J.-H. Su, M. El-Shazly, C.-F. Wu, Y.-C. Du, Y.-M. Hsu, J.-C. Yang, M.-K. Weng and C.-H. Chou, Antileukemic scalarane sesterterpenoids and meroditerpenoid from *Carteriospongia* (*Phyllospongia*) sp., induce apoptosis via dual inhibitory effects on topoisomerase II and Hsp90, *Sci. Rep.*, 2016, 6, 1-14.
49. K. Hagiwara, J. E. Garcia Hernandez, M. K. Harper, A. Carroll, C. A. Motti, J. Awaya, H.-Y. Nguyen and A. D. Wright, Puupehenol, a potent antioxidant antimicrobial meroterpenoid from a Hawaiian deep-water *Dactylospongia* sp. sponge, *J. Nat. Prod.*, 2015, 78, 325-329.
50. J. Li, F. Yang, Z. Wang, W. Wu, L. Liu, S.-P. Wang, B.-X. Zhao, W.-H. Jiao, S.-H. Xu and H.-W. Lin, Unusual anti-inflammatory meroterpenoids from the marine sponge *Dactylospongia* sp, *Org. Biomol. Chem.*, 2018, 16, 6773-6782.
51. S. S. Ebada, N. de Voogd, R. Kalscheuer, W. E. Müller and P. Proksch, Cytotoxic drimane meroterpenoids from the Indonesian marine sponge *Dactylospongia elegans*, *Phytochem. Lett.*, 2017, 22, 154-158.
52. G. Daletos, N. J. de Voogd, W. E. Müller, V. Wray, W. Lin, D. Feger, M. Kubbutat, A. H. Aly and P. Proksch, Cytotoxic and protein kinase inhibiting nakijiquinones and nakijiquinols from the sponge *Dactylospongia metachromia*, *J. Nat. Prod.*, 2014, 77, 218-226.
53. L. Du, Y.-D. Zhou and D. G. Nagle, Inducers of hypoxic response: Marine sesquiterpene quinones activate HIF-1, *J. Nat. Prod.*, 2013, 76, 1175-1181.
54. W. Balansa, U. Mettal, Z. G. Wuisan, A. Plubrukarn, F. G. Ijong, Y. Liu and T. F. Schäberle, A New Sesquiterpenoid Aminoquinone from an Indonesian Marine Sponge, *Mar. Drugs*, 2019, 17, 1-7.
55. R. Zhong, C.-L. Shao, N. J. de Voogd and C.-Y. Wang, Sesquiterpene derivatives and steroids from the sponge *Dactylospongia elegans* collected from the south China sea, *Chem. Nat. Compd.*, 2014, 50, 1-3.
56. H.-B. Yu, B.-B. Gu, S.-P. Wang, C.-W. Cheng, F. Yang and H.-W. Lin, New diterpenoids from the marine sponge *Dactylospongia elegans*, *Tetrahedron*, 2017, 73, 6657-6661.
57. J. Li, Z. Wang, F. Yang, W.-H. Jiao, H.-W. Lin and S.-H. Xu, Two new steroids with cytotoxicity from the marine sponge *Dactylospongia elegans* collected from the South China Sea, *Nat. Prod. Res.*, 2019, 33, 1340-1344.
58. J. Li, W. Wu, F. Yang, L. Liu, S. P. Wang, W. H. Jiao, S. H. Xu and H. W. Lin, Popolohuanones G–I, Dimeric Sesquiterpene Quinones with IL-6 Inhibitory Activity from the Marine Sponge *Dactylospongia elegans*, *Chem. Biodivers.*, 2018, 15, 1-7.

59. H.-B. Yu, Z.-F. Yin, B.-B. Gu, J.-P. Zhang, S.-P. Wang, F. Yang and H.-W. Lin, Cytotoxic meroterpenoids from the marine sponge *Dactylospongia elegans*, *Nat. Prod. Res.*, 2019, 24, 1-7.
60. Q. Wang, X. Tang, X. Luo, N. J. de Voogd, P. Li and G. Li, (+)- and (-)-Spiroreticulatine, A Pair of Unusual Spiro Bisheterocyclic Quinoline-imidazole Alkaloids from the South China Sea Sponge *Fascaplysinopsis reticulata*, *Org. Lett.*, 2015, 17, 3458-3461.
61. G.-F. Qin, X.-L. Tang, N. J. de Voogd, P.-L. Li and G.-Q. Li, Cytotoxic components from the Xisha sponge *Fascaplysinopsis reticulata*, *Nat. Prod. Res.*, 2018, DOI: 10.1080/14786419.2018.1502765, 1-7.
62. P.-E. Campos, E. Pichon, C. Moriou, P. Clerc, R. Trépos, M. Frederich, N. De Voogd, C. Hellio, A. Gauvin-Bialecki and A. Al-Mourabit, New Antimalarial and Antimicrobial Tryptamine Derivatives from the Marine Sponge *Fascaplysinopsis reticulata*, *Mar. Drugs*, 2019, 17, 1-10.
63. Q. Wang, X.-L. Tang, X.-C. Luo, N. J. de Voogd, P.-L. Li and G.-Q. Li, Aplysinopsin-type and Bromotyrosine-derived Alkaloids from the South China Sea Sponge *Fascaplysinopsis reticulata*, *Sci. Rep.*, 2019, 9, 1-10.
64. T.-R. Su, Z.-J. Liao, M.-C. Lu, Y.-J. Wu and J.-H. Su, Cytotoxic Monocarbocyclic Sesterterpenoids from a Marine Sponge *Luffariella* sp, *Bull. Chem. Soc. Jpn.*, 2015, 88, 176-182.
65. A. Faricha, P. Ahmadi, N. J. Devoogd and J. Tanaka, Two isospongian diterpenes from the sponge *luffariella* sp, *Nat. Prod. Commun.*, 2017, 12, 1011-1012.
66. P. Ahmadi, M. Higashi, N. J. d. Voogd and J. Tanaka, Two Furanosesterterpenoids from the Sponge *Luffariella variabilis*, *Mar. Drugs*, 2017, 15, 1-8.
67. S. De Caralt, D. Bry, N. Bontemps, X. Turon, M.-J. Uriz and B. Banaigs, Sources of Secondary Metabolite Variation in *Dysidea avara* (Porifera: Demospongiae): The Importance of Having Good Neighbors, *Mar. Drugs*, 2013, 11, 489-503.
68. A. Hamed, W. Wätjen, R. Schmitz, Y. Chovolou, R. Edrada-Ebel, D. Youssef, M. Kamel and C. Chaidir, A New Bioactive Sesquiterpenoid Quinone from the Mediterranean Sea Marine Sponge *Dysidea avara*, *Nat. Prod. Commun.*, 2013, 8, 289-292.
69. W.-H. Jiao, T.-T. Xu, H.-B. Yu, G.-D. Chen, X.-J. Huang, F. Yang, Y.-S. Li, B.-N. Han, X.-Y. Liu and H.-W. Lin, Dysideanones A–C, Unusual Sesquiterpene Quinones from the South China Sea Sponge *Dysidea avara*, *J. Nat. Prod.*, 2014, 77, 346-350.
70. W.-H. Jiao, T.-T. Xu, B.-B. Gu, G.-H. Shi, Y. Zhu, F. Yang, B.-N. Han, S.-P. Wang, Y.-S. Li and W. Zhang, Bioactive sesquiterpene quinols and quinones from the marine sponge *Dysidea avara*, *RSC Adv.*, 2015, 5, 7730-7738.
71. D. B. Abdjul, H. Yamazaki, O. Takahashi, R. Kirikoshi, K. Ukai and M. Namikoshi, Sesquiterpene Hydroquinones with Protein Tyrosine Phosphatase 1B Inhibitory Activities from a *Dysidea* sp. Marine Sponge Collected in Okinawa, *J. Nat. Prod.*, 2016, 79, 1842-1847.
72. A. Trianto, N. J. de Voogd and J. Tanaka, Two new compounds from an Indonesian sponge *Dysidea* sp, *J. Asian Nat. Prod. Res.*, 2014, 16, 163-168.
73. W.-H. Jiao, J. Li, Q. Liu, T.-T. Xu, G.-H. Shi, H.-B. Yu, F. Yang, B.-N. Han, M. Li and H.-W. Lin, Dysidinoid A, an Unusual Meroterpenoid with Anti-MRSA Activity from the South China Sea Sponge *Dysidea* sp, *Molecules*, 2014, 19, 18025-18032.
74. S. Sun, C. B. Canning, K. Bhargava, X. Sun, W. Zhu, N. Zhou, Y. Zhang and K. Zhou, Polybrominated diphenyl ethers with potent and broad spectrum antimicrobial activity from the marine sponge *Dysidea*, *Bioorg. Med. Chem. Lett.*, 2015, 25, 2181-2183.
75. C.-K. Kim, J.-K. Woo, S.-H. Kim, E. Cho, Y.-J. Lee, H.-S. Lee, C. J. Sim, D.-C. Oh, K.-B. Oh and J. Shin, Meroterpenoids from a tropical *Dysidea* sp. sponge, *J. Nat. Prod.*, 2015, 78, 2814-2821.
76. X. Zhang, H.-Y. Xu, A.-M. Huang, L. Wang, Q. Wang, P.-Y. Cao and P.-M. Yang, Antibacterial Meroterpenoids from the South China Sea Sponge *Dysidea* sp, *Chem. Pharm. Bull.*, 2016, 64, 1036-1042.
77. Y. Lu and M. Zhao, Two highly acetylated sterols from the marine sponge *Dysidea* sp, *Z Naturforsch B*, 2017, 72, 49-52.
78. P. V. Kiem, C. V. Minh, N. X. Nhiem, N. T. Cuc, N. V. Quang, H. L. Tuan Anh, B. H. Tai, P. H. Yen, N. T. Hoai, K. Y. Ho, N. Kim, S. Park and S. H. Kim, Muurolane-type sesquiterpenes from marine sponge *Dysidea cinerea*, *Magn. Reson. Chem.*, 2014, 52, 51-56.
79. P. Van Kiem, N. X. Nhiem, N. Van Quang, C. Van Minh, N. H. Nam, N. T. Cuc, H. T. Le Anh, B. H. Tai, P. H. Yen, N. X. Cuong, N. P. Thao, N. T. Hoai, N. Y. Kim, S. J. Park and K. S. Hyun, New butenolide and pentenolide from *Dysidea cinerea*, *Nat. Prod. Commun.*, 2013, 8, 1751-1752.
80. W.-H. Jiao, T.-T. Xu, H.-B. Yu, F.-R. Mu, J. Li, Y.-S. Li, F. Yang, B.-N. Han and H.-W. Lin, Dysidaminones A–M, cytotoxic and NF- $\kappa$ B inhibitory sesquiterpene aminoquinones from the South China Sea sponge *Dysidea fragilis*, *Rsc Adv.*, 2014, 4, 9236-9246.
81. N. T. Cue, T. Anh Hle, D. T. Hang, N. X. Nhiem, N. H. Dang, N. H. Nama, P. H. Yen, C. Thung do, V. K. Thuc, C. V. Minh and P. V. Kiema, Sesquiterpenes from the Vietnamese Marine Sponge *Dysidea fragilis*, *Nat. Prod. Commun.*, 2015, 10, 1341-1342.
82. P. V. Kiem, N. X. Nhiem, B. H. Tai, T. Anh Hle, D. T. Hang, N. T. Cuc, T. Huyen le, N. H. Nam, P. H. Yen, C. Thung do and C. V. Minh, Bis-sesquiterpene from the Marine Sponge *Dysidea fragilis*, *Nat. Prod. Commun.*, 2016, 11, 439-441.



83. H. Li, Q. Zhang, X. Jin, X. Zou, Y. Wang, D. Hao, F. Fu, W. Jiao, C. Zhang and H. Lin, Dysifragilone A inhibits LPS-induced RAW264. 7 macrophage activation by blocking the p38 MAPK signaling pathway, *Mol. Med. Rep.*, 2018, 17, 674-682.
84. W.-H. Jiao, B.-H. Cheng, G.-H. Shi, G.-D. Chen, B.-B. Gu, Y.-J. Zhou, L.-L. Hong, F. Yang, Z.-Q. Liu, S.-Q. Qiu, Z.-G. Liu, P.-C. Yang and H.-W. Lin, Dysivillosins A–D, Unusual Anti-allergic Meroterpenoids from the Marine Sponge *Dysidea villosa*, *Sci. Rep.*, 2017, 7, 1-10.
85. H. Liu, K. Lohith, M. Rosario, T. H. Pulliam, R. D. O'Connor, L. J. Bell and C. A. Bewley, Polybrominated diphenyl ethers: structure determination and trends in antibacterial activity, *J. Nat. Prod.*, 2016, 79, 1872-1876.
86. M. Arai, D. Shin, K. Kamiya, R. Ishida, A. Setiawan, N. Kotoku and M. Kobayashi, Marine spongean polybrominated diphenyl ethers, selective growth inhibitors against the cancer cells adapted to glucose starvation, inhibits mitochondrial complex II, *J. Nat. Med.*, 2017, 71, 44-49.
87. M. Shingaki, T. Wauke, P. Ahmadi and J. Tanaka, Four cytotoxic spongian diterpenes from the sponge *Dysidea cf. arenaria*, *Chem. Pharm. Bull.*, 2016, 64, 272-275.
88. Y.-H. Gui, W.-H. Jiao, M. Zhou, Y. Zhang, D.-Q. Zeng, H.-R. Zhu, K.-C. Liu, F. Sun, H.-F. Chen and H.-W. Lin, Septosones A–C, in Vivo Anti-inflammatory Meroterpenoids with Rearranged Carbon Skeletons from the Marine Sponge *Dysidea septosa*, *Org. Lett.*, 2019, 21, 767-770.
89. H. Yamazaki, D. A. Sumilat, S.-i. Kanno, K. Ukai, H. Rotinsulu, D. S. Wewengkang, M. Ishikawa, R. E. Mangindaan and M. Namikoshi, A polybromodiphenyl ether from an Indonesian marine sponge *Lamellodysidea herbacea* and its chemical derivatives inhibit protein tyrosine phosphatase 1B, an important target for diabetes treatment, *J. Nat. Med.*, 2013, 67, 730-735.
90. M. Torii, H. Kato, Y. Hitora, E. D. Angkouw, R. E. P. Mangindaan, N. J. de Voogd and S. Tsukamoto, Lamellodysidines A and B, Sesquiterpenes Isolated from the Marine Sponge *Lamellodysidea herbacea*, *J. Nat. Prod.*, 2017, 80, 2536-2541.
91. D.-Y. Sun, G.-Y. Han, N.-N. Yang, L.-F. Lan, X.-W. Li and Y.-W. Guo, Racemic trinorsesquiterpenoids from the Beihai sponge *Spongia officinalis*: structure and biomimetic total synthesis, *Org. Chem. Front.*, 2018, 5, 1022-1027.
92. G.-Y. Han, D.-Y. Sun, L.-F. Liang, L.-G. Yao, K.-X. Chen and Y.-W. Guo, Spongian diterpenes from Chinese marine sponge *Spongia officinalis*, *Fitoterapia*, 2018, 127, 159-165.
93. P. Ahmadi, T. Haruyama, N. Kobayashi, N. J. de Voogd and J. Tanaka, Spongian Diterpenes from the Sponge *Hyattella* aff. *intestinalis*, *Chem. Pharm. Bull.*, 2017, 65, 874-877.
94. S. M. Parrish, W. Y. Yoshida, T. P. Kondratyuk, E.-J. Park, J. M. Pezzuto, M. Kelly and P. G. Williams, Spongiapyridine and Related Spongians Isolated from an Indonesian *Spongia* sp, *J. Nat. Prod.*, 2014, 77, 1644-1649.
95. I. Yang, S.-J. Nam and H. Kang, Two New Scalaranes from a Korean Marine Sponge *Spongia* sp, *Nat. Prod. Sci.*, 2015, 21, 289-292.
96. D. B. Abdjul, H. Yamazaki, S.-i. Kanno, D. S. Wewengkang, H. Rotinsulu, D. A. Sumilat, K. Ukai, M. M. Kapojos and M. Namikoshi, Furanoterpenes, new types of protein tyrosine phosphatase 1B inhibitors, from two Indonesian marine sponges, *Ircinia* and *Spongia* spp, *Bioorg. Med. Chem. Lett.*, 2017, 27, 1159-1161.
97. T. Ito, H. M. Nguyen, N. N. Win, H. Q. Vo, H. T. Nguyen and H. Morita, Three new sesquiterpene aminoquinones from a Vietnamese *Spongia* sp. and their biological activities, *J. Nat. Med.*, 2018, 72, 298-303.
98. I. Yang, J. Lee, J. Lee, D. Hahn, J. Chin, H. D. Won, J. Ko, H. Choi, A. Hong, S.-J. Nam and H. Kang, Scalalactams A–D, Scalarane Sesterterpenes with a  $\gamma$ -Lactam Moiety from a Korean *Spongia* Sp. Marine Sponge, *Molecules*, 2018, 23, 1-10.
99. J. Li, B.-B. Gu, F. Sun, J.-R. Xu, W.-H. Jiao, H.-B. Yu, B.-N. Han, F. Yang, X.-C. Zhang and H.-W. Lin, Sesquiterpene quinones/hydroquinones from the marine sponge *Spongia pertusa* Esper, *J. Nat. Prod.*, 2017, 80, 1436-1445.
100. A. H. El-Desoky, H. Kato, E. D. Angkouw, R. E. P. Mangindaan, N. J. de Voogd and S. Tsukamoto, Ceylonamides A–F, Nitrogenous Spongian Diterpenes That Inhibit RANKL-Induced Osteoclastogenesis, from the Marine Sponge *Spongia ceylonensis*, *J. Nat. Prod.*, 2016, 79, 1922-1928.
101. A. H. El-Desoky, H. Kato, I. Kagiya, Y. Hitora, F. Losung, R. E. P. Mangindaan, N. J. de Voogd and S. Tsukamoto, Ceylonins A–F, Spongian Diterpene Derivatives That Inhibit RANKL-Induced Formation of Multinuclear Osteoclasts, from the Marine Sponge *Spongia ceylonensis*, *J. Nat. Prod.*, 2017, 80, 90-95.
102. A. H. El-Desoky, H. Kato and S. Tsukamoto, Ceylonins G–I: spongian diterpenes from the marine sponge *Spongia ceylonensis*, *J. Nat. Med.*, 2017, 71, 765-769.
103. R. Kumar, R. Subramani and W. Aalbersberg, Three bioactive sesquiterpene quinones from the Fijian marine sponge of the genus *Hippospongia*, *Nat. Prod. Res.*, 2013, 27, 1488-1491.
104. Y.-M. Fuh, M.-C. Lu, C.-H. Lee and J.-H. Su, Cytotoxic scalarane sesterterpenoids from a marine sponge *Hippospongia* sp, *Nat. Prod. Commun.*, 2013, 8, 571-572.
105. C. C. Su, H. J. Su, K. J. Liang, S. J. Tsaif and J. H. Su, A Norsesterterpene Peroxide from a Marine Sponge *Hippospongia* sp, *Nat. Prod. Commun.*, 2016, 11, 445-446.
106. Y.-C. Chen, M.-C. Lu, M. El-Shazly, K.-H. Lai, T.-Y. Wu, Y.-M. Hsu, Y.-L. Lee and Y.-C. Liu, Breaking down Leukemia Walls: Heteronemin, a Sesterterpene Derivative, Induces Apoptosis in Leukemia Molt4 Cells through Oxidative Stress, Mitochondrial Dysfunction and Induction of Talin Expression, *Mar. Drugs*, 2018, 16, 1-22.

107. S.-J. Piao, Y.-L. Song, W.-H. Jiao, F. Yang, X.-F. Liu, W.-S. Chen, B.-N. Han and H.-W. Lin, Hippolachnin A, a new antifungal polyketide from the South China sea sponge *Hippospongia lachne*, *Org. Lett.*, 2013, 15, 3526-3529.
108. S.-J. Piao, W.-H. Jiao, F. Yang, Y.-H. Yi, Y.-T. Di, B.-N. Han and H.-W. Lin, New Hippolide Derivatives with Protein Tyrosine Phosphatase 1B Inhibitory Activity from the Marine Sponge *Hippospongia lachne*, *Mar. Drugs*, 2014, 12, 4096-4109.
109. W. H. Jiao, L. L. Hong, J. B. Sun, S. J. Piao, G. D. Chen, H. Deng, S. P. Wang, F. Yang and H. W. Lin, (±)-Hippolide J–A Pair of Unusual Antifungal Enantiomeric Sesterterpenoids from the Marine Sponge *Hippospongia lachne*, *Eur. J. Org. Chem.*, 2017, 2017, 3421-3426.
110. L.-L. Hong, H.-B. Yu, J. Wang, W.-H. Jiao, B.-H. Cheng, F. Yang, Y.-J. Zhou, B.-B. Gu, S.-J. Song and H.-W. Lin, Unusual Anti-allergic Diterpenoids from the Marine Sponge *Hippospongia lachne*, *Sci. Rep.*, 2017, 7, 1-7.
111. D. B. Abdjul, H. Yamazaki, O. Takahashi, R. Kirikoshi, R. E. P. Mangindaan and M. Namikoshi, Two new protein tyrosine phosphatase 1B inhibitors, hyattellactones A and B, from the Indonesian marine sponge *Hyattella* sp, *Bioorg. Med. Chem. Lett.*, 2015, 25, 904-907.
112. C.-K. Kim, I.-H. Song, H. Y. Park, Y.-J. Lee, H.-S. Lee, C. J. Sim, D.-C. Oh, K.-B. Oh and J. Shin, Suvanine sesterterpenes and deacyl irciniasulfonic acids from a tropical *Coscinoderma* sp. sponge, *J. Nat. Prod.*, 2014, 77, 1396-1403.
113. D. Hahn, J. Chin, H. Kim, I. Yang, D. H. Won, M. Ekins, H. Choi, S.-J. Nam and H. Kang, Sesquiterpenoids with PPAR $\delta$  agonistic effect from a Korean marine sponge *Ircinia* sp, *Tetrahedron Lett.*, 2014, 55, 4716-4719.
114. I. Yang, H. Choi, D. H. Won, S.-J. Nam and H. Kang, An antibacterial 9, 11-secosterol from a marine sponge *Ircinia* sp, *Bull. Korean Chem. Soc.*, 2014, 35, 3360-3362.
115. D. B. Abdjul, H. Yamazaki, K. Ukai and M. Namikoshi, Two new indole derivatives from a marine sponge *Ircinia* sp. collected at Iriomote Island, *J. Nat. Med.*, 2015, 69, 416-420.
116. I. Yang, H. Choi, S.-J. Nam and H. Kang, A new 9,11-secosterol with a 1,4-quinone from a Korean marine sponge *Ircinia* sp, *Arch. Pharm. Res.*, 2015, 38, 1970-1974.
117. Y.-Y. Lai, M.-C. Lu, L.-H. Wang, J.-J. Chen, L.-S. Fang, Y.-C. Wu and P.-J. Sung, New Scalarane Sesterterpenoids from the Formosan Sponge *Ircinia felix*, *Mar. Drugs*, 2015, 13, 4296-4309.
118. Y.-Y. Lai, L.-C. Chen, C.-F. Wu, M.-C. Lu, Z.-H. Wen, T.-Y. Wu, L.-S. Fang, L.-H. Wang, Y.-C. Wu and P.-J. Sung, New cytotoxic 24-homoscalarane sesterterpenoids from the sponge *Ircinia felix*, *Int. J. Mol. Sci.*, 2015, 16, 21950-21958.
119. G. Chianese, J. Silber, P. Luciano, C. Merten, D. Erpenbeck, B. Topaloglu, M. Kaiser and D. Tasdemir, Antiprotozoal Linear Furanosesterterpenoids from the Marine Sponge *Ircinia oros*, *J. Nat. Prod.*, 2017, 80, 2566-2571.
120. D. T. Dung, N. X. Nhiem, B. H. Tai, P. H. Yen, H. L. T. Anh, D. C. Thung, C. Van Minh and P. Van Kiem, Furanosesterterpenes from the marine sponge *Ircinia echinata* (Keller, 1889), *Vietnam J. Chem.*, 2016, 54, 477-482.
121. T. T. Trinh, N. B. Truong, A. Longeon, M. T. Doan, A. Deville, M. V. Chau, C. V. Pham and M.-L. Bourguet-Kondracki, New 9 $\alpha$ -Hydroxy-5 $\alpha$ ,6 $\alpha$ -epoxysterols from the Vietnamese Marine Sponge *Ircinia echinata*, *Mar. Drugs*, 2018, 16, 1-10.
122. J.-K. Woo, J.-e. Jeon, B. Kim, C. J. Sim, D.-C. Oh, K.-B. Oh and J. Shin, A New Sesterterpene from the Korean *Sarcotragus* sp. Sponge, *Nat. Prod. Sci.*, 2015, 21, 237-239.
123. Y. BenRedjem Romdhane, M. Elbour, M. Carbone, M. L. Ciavatta, M. Gavagnin, V. Mathieu, Ronique, F. Lefranc, L. Ktari, K. Ben Mustapha, A. Boudabous, R. Kiss and E. Mollo, In Vitro Growth Inhibitory Activities of Natural Products from Irciniid Sponges against Cancer Cells: A Comparative Study, *Biomed Res. Int.*, 2016, 2016, 1-6.
124. A. H. Afifi, I. Kagiya, A. H. El-Desoky, H. Kato, R. E. Mangindaan, N. J. de Voogd, N. M. Ammar, M. S. Hifnawy and S. Tsukamoto, Sulawesins A–C, furanosesterterpene tetronic acids that inhibit USP7, from a *Psammocinia* sp. marine sponge, *J. Nat. Prod.*, 2017, 80, 2045-2050.
125. D. Hahn, D. H. Won, B. Mun, H. Kim, C. Han, W. Wang, T. Chun, S. Park, D. Yoon, H. Choi, S.-J. Nam, M. Ekins, J. Chin and H. Kang, Cytotoxic scalarane sesterterpenes from a Korean marine sponge *Psammocinia* sp, *Bioorg. Med. Chem. Lett.*, 2013, 23, 2336-2339.
126. W. Balansa, R. Islam, F. Fontaine, A. M. Piggott, H. Zhang, X. Xiao, T. I. Webb, D. F. Gilbert, J. W. Lynch and R. J. Capon, Sesterterpene glycyl-lactams: a new class of glycine receptor modulator from Australian marine sponges of the genus *Psammocinia*, *Org. Biomol. Chem.*, 2013, 11, 4695-4701.
127. L. Zur, A. Bishara, M. Aknin, D. Neumann, N. Ben-Califa and Y. Kashman, Derivatives of Salarin A, Salarin C and Tulearin A—*Fascaplysinopsis* sp. Metabolites, *Mar. Drugs*, 2013, 11, 4487-4509.
